# Supplementary material for: Intrinsic Disorder in PTEN and its Interactome Confers Structural Plasticity and Functional Versatility
Source: PubMed Central journal article supplement — Sci Rep. 2013 Jun 20;3:2035. doi: 10.1038/srep02035 (PMC3687229; doi:10.1038/srep02035), 2013-06-20
Supplement: srep02035-s1.pdf [file srep02035-s1.pdf]

# **Intrinsic Disorder in PTEN and its Interactome Confers**

## **Structural Plasticity and Functional Versatility**

Prerna Malaney<sup>1†</sup>

Ravi Ramesh Pathak<sup>1†</sup>

Bin Xue<sup>3</sup>

Vladimir N. Uversky<sup>3-5</sup>

Vrushank Dave<sup>1,2\*</sup>

### **Supplementary Material List**

#### 1. Figures

Figure S1. Mutational Analysis for the PTEN protein

Figure S2. Sequence alignments for PTEN catalytic dual phosphatase motif

Figure S3. Sequence alignments for PTEN C-tail interacting proteins

Figure S4. MoRF prediction for PTEN

Figure S5. ELMs output for PTEN

Figure S6. DISPHOS prediction for PTEN

#### 2. Tables

Table S1. PTEN Primary Interactome

Table S2. GO of 40 interactome proteins

Table S3. Disorder score for mapped proteins

Table S4. Identification of cancer as the most over represented disease in the primary interactomes

Table S5. PTEN Secondary Interactome

Table S6. Disorder analysis of the PTEN-Cancer Interactome

Table S7. Derivation of PTEN associated cancer hubs using a human cancer signaling map

Table S8. Disorder prediction for kinases

## **SUPPLEMENTARY FIGURES**

## **Supplementary Figure Legends**

### **Supplementary Figure S1: Mutational Analysis for the PTEN protein**

PTEN mutations from two databases cBioPortal for Cancer Genomics and the Roche Cancer Genome Database were analyzed. The number of mutations occurring in each amino acid residue was plotted. The PTEN C-tail IDR region is indicated in red.

### **Supplementary Figure S2: Sequence alignments for PTEN catalytic dual phosphatase motif**

Sequence alignments were performed for the PTEN protein from vertebrates and invertebrates. All of the species considered show a conserved catalytic motif HCKAGKGR. All FASTA sequences for the PTEN protein were retrieved from UniProt. The sequence alignments were performed using Clustal Omega.

### **Supplementary Figure S3: Sequence alignments for PTEN C-tail interacting proteins**

A literature review helped identify the interaction domains/motifs in thirteen PTEN C-tail interacting proteins. The interaction domain details as well as the relevant references are part of the table. Sequence alignments were performed for these thirteen PTEN C-tail interacting proteins: neprilysin, NHERF1, NHERF2, MSP58, Prex2, sharpin, MAGI1, MAGI2, MAGI3, MAST1, MAST2, MAST3 and DLG1. The alignments are restricted to the PTEN interaction motifs in these proteins (as indicated in the table). The sequence alignments have been performed for vertebrate animals and invertebrate animals (wherever available). Conserved residues are indicated in red. Short motifs that are known to be critical for interaction with PTEN are highlighted in yellow. Most of these PTEN C-tail interaction motifs show good sequence conservation across species. This indicates that the PTEN tail has evolved in vertebrates so as to incorporate features that allow interaction with these conserved domains. All FASTA sequences for the proteins were retrieved from UniProt. The sequence alignments were performed using Clustal Omega.

#### **Supplementary Figure S4: MoRF prediction for PTEN.**

MoRFPred (Disfani et al, 2012), a computational tool, was used to identify MoRF regions within the PTEN protein. The output for PTEN is illustrated with the MoRF regions highlighted in red.

#### **Supplementary Figure S5: ELMs output for PTEN**

ELM output for PTEN (Redrawn from the output from ELM; <http://elm.eu.org/>). We ran the ELM software with PTEN as the query protein. The query protein is scanned for annotated ELMs. Several other tools are used in conjunction to reveal structural information about the query protein. SMART is used to detect protein domains. IUPred is used to predict any disorder within the protein structure. IUPred uses a cut-off of 0.5, regions having values above 0.5 are considered to be disordered and those below 0.5 are considered to be ordered. IUPred helps correlate the occurrence of ELMs with disorder in a protein structure. The output also shows a conservation score for each of the motifs. Generally, it is observed that the conserved motifs appear to be the ones which are functional. Conservation is calculated using a tree-based method with lighter shades of blue representing a lower conservation score while darker shades represent higher conservation scores. Details regarding the phosphorylation modifications occurring within the protein sequence are obtained from the Phospho.ELM database (Dinkel et al, 2012). The ELM output for PTEN shows that it possesses several linear motifs distributed throughout the length of the protein. It is interesting, however, to note that linear motifs with a high conservation score are restricted to the disordered C-tail region indicating its functional significance in PTEN function.

#### **Supplementary Figure S6: DISPHOS prediction for PTEN.**

DISPHOS (Iakoucheva, Radivojac et al, 2004), a structural disorder based phosphorylation prediction software was used to identify residues within the PTEN protein that are modified through phosphorylation events. The software predicts all of the serine and threonine sites modified by phosphorylation with the exception of T382 and T383. The software, however, fails to pick up any of the currently documented tyrosine phosphorylation sites.

**Supplementary Figure S1**  
**Mutational Analysis for the PTEN protein**

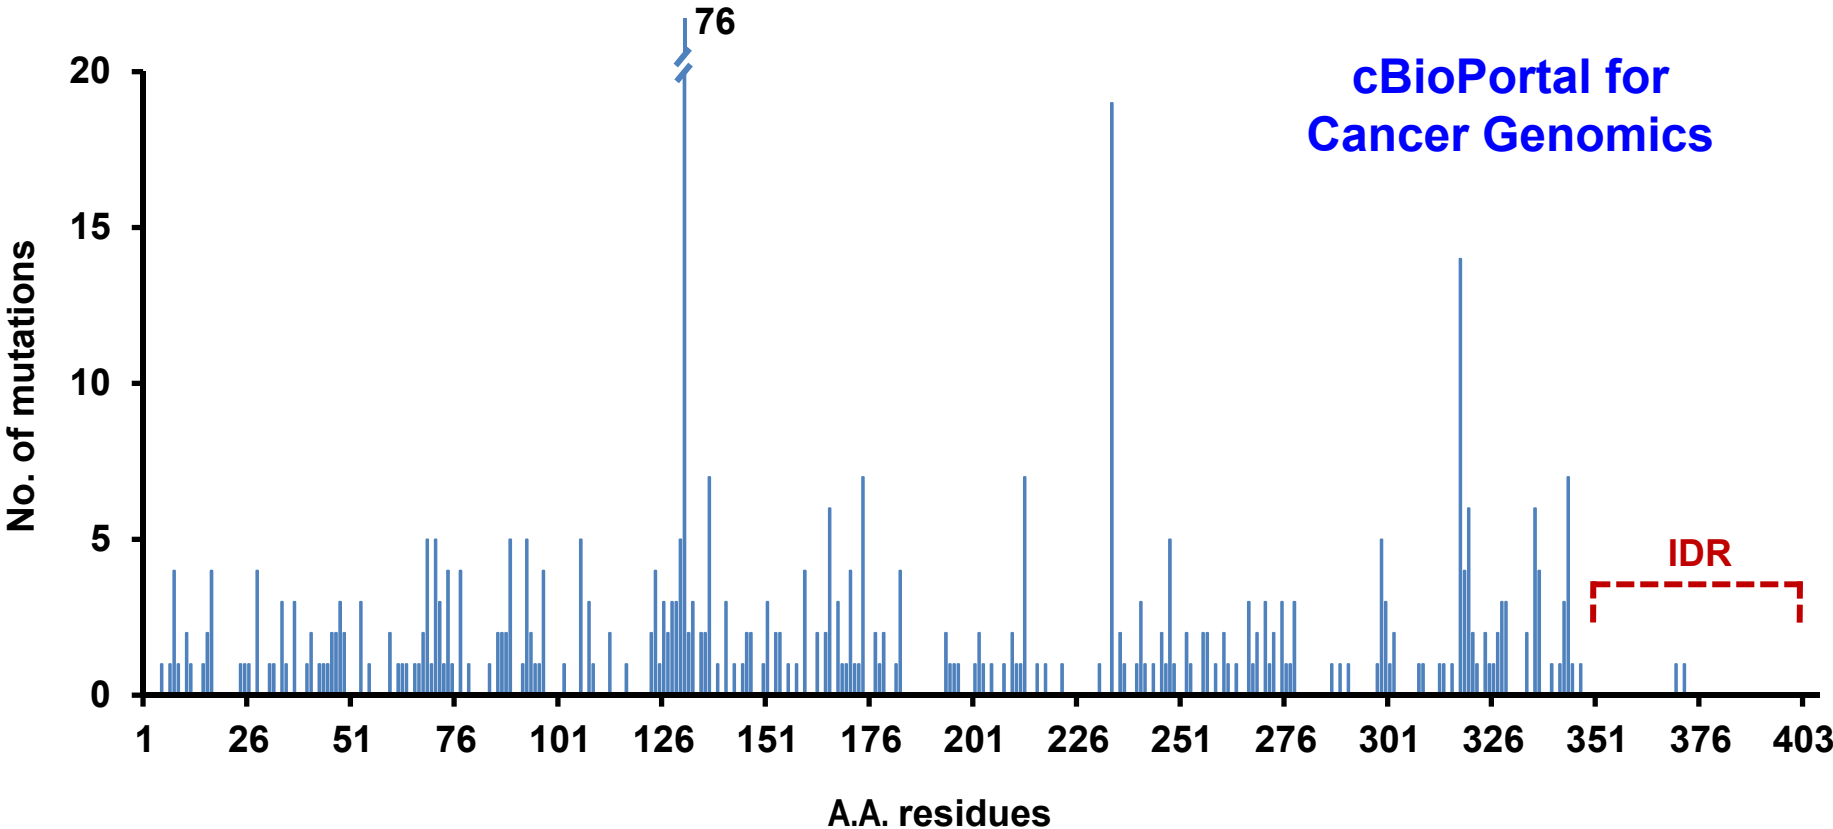

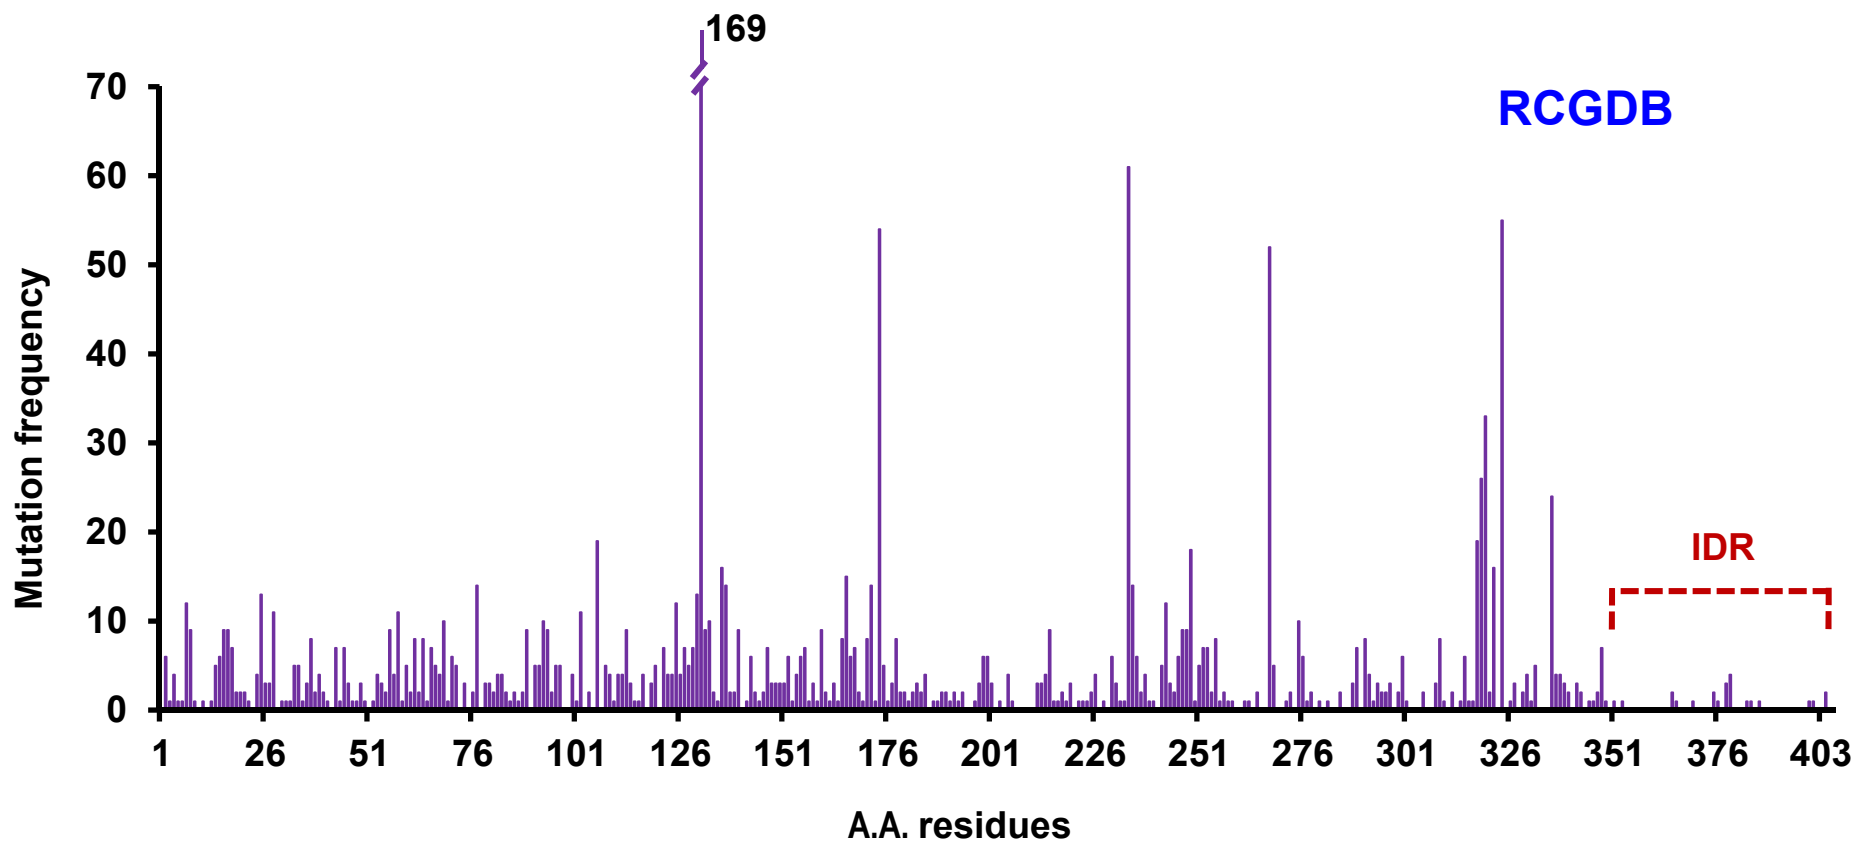

Supplementary Figure S2  
 Sequence alignments for PTEN catalytic dual phosphatase motif

|                             |                                | Dual specificity phosphatase<br>catalytic motif |          |          |
|-----------------------------|--------------------------------|-------------------------------------------------|----------|----------|
|                             |                                | 123                                             | 130      |          |
|                             | <i>Homo sapiens</i>            | HVAAI                                           | HCKAGKGR |          |
|                             | <i>Pan troglodytes</i>         | HVAAI                                           | HCKAGKGR |          |
|                             | <i>Gorilla gorilla gorilla</i> | HVAAI                                           | HCKAGKGR |          |
|                             | <i>Macaca mulatta</i>          | HVAAI                                           | HCKAGKGR |          |
|                             | <i>Bos taurus</i>              | HVAAI                                           | HCKAGKGR |          |
|                             | <i>Sus scrofa</i>              | HVAAI                                           | HCKAGKGR |          |
|                             | <i>Ailuropoda melanoleuca</i>  | HVAAI                                           | HCKAGKGR |          |
|                             | <i>Canis familiaris</i>        | HVAAI                                           | HCKAGKGR |          |
|                             | <i>Mus musculus</i>            | HVAAI                                           | HCKAGKGR |          |
|                             | <i>Rattus norvegicus</i>       | HVAAI                                           | HCKAGKGR |          |
|                             | <i>Sarcophilus harrisii</i>    | HVAAI                                           | HCKAGKGR |          |
| Vertebrates                 | <i>Gallus gallus</i>           | HVAAI                                           | HCKAGKGR |          |
|                             | <i>Pelodiscus sinensis</i>     | HVAAI                                           | HCKAGKGR |          |
|                             | <i>Anolis carolinensis</i>     | HVAAI                                           | HCKAGKGR |          |
|                             | <i>Xenopus laevis</i>          | NVAAI                                           | HCKAGKGR |          |
|                             | <i>Xenopus tropicalis</i>      | NVAAI                                           | HCKAGKGR |          |
|                             | <i>Takifugu rubripes</i>       | HVAAI                                           | HCKAGKGR |          |
|                             | <i>Oryzias latipes_1</i>       | HVAAI                                           | HCKAGKGR |          |
|                             | <i>Oryzias latipes_2</i>       | HVAAI                                           | HCKAGKGR |          |
|                             | <i>Danio rerio_1</i>           | HVAAI                                           | HCKAGKGR |          |
|                             | <i>Danio rerio_2</i>           | HVAAI                                           | HCKAGKGR |          |
|                             | <i>Latimeria chalumnae</i>     | HVAAI                                           | HCKAGKGR |          |
|                             | Invertebrates                  | <i>S. kowalevskii</i>                           | NVAVI    | HCKAGKGR |
|                             |                                | <i>Apis mellifera_1</i>                         | NVAVV    | HCKAGKGR |
| <i>Apis mellifera_2</i>     |                                | NVAVV                                           | HCKAGKGR |          |
| <i>Apis mellifera_3</i>     |                                | NVAVV                                           | HCKAGKGR |          |
| <i>D. melanogaster_1</i>    |                                | NVVAV                                           | HCKAGKGR |          |
| <i>D. melanogaster_2</i>    |                                | NVVAV                                           | HCKAGKGR |          |
| <i>D. melanogaster_3</i>    |                                | NVVAV                                           | HCKAGKGR |          |
| <i>Trichinella spiralis</i> |                                | NVVAI                                           | HCKAGKGR |          |

## Supplementary Figure S3

### Sequence alignments for PTEN C-tail interacting proteins

| Binding partner | Interaction interface in PTEN C-tail                     | Interaction interface in the binding partner  | Reference |
|-----------------|----------------------------------------------------------|-----------------------------------------------|-----------|
|                 |                                                          |                                               |           |
| Neprilysin      | AA 379-385 of PTEN                                       | A triple lysine residue in cytoplasmic domain | [1]       |
| NHERF1          | PDZ binding motif of PTEN                                | Q37 residue in the PDZ1 domain                | [2]       |
| NHERF2          | PDZ binding motif of PTEN                                | PDZ1 domain                                   | [2]       |
| MSP58           | C-terminal region of PTEN (interaction requires Thr366)  | Forkhead Association (FHA) Domain             | [3]       |
| PREX2           | C-terminal region of PTEN (not including the PDZ domain) | Pleckstrin Homology (PH) domain               | [4]       |
| Sharpin         | Amino and C-terminus of PTEN                             | Ubiquitin Like (UBL) domain                   | [5]       |
| MAGI-1b         | PDZ binding motif                                        | 2nd PDZ domain                                | [6]       |
| MAGI-2          | PDZ binding motif                                        | 2nd PDZ domain                                | [7]       |
| MAGI-3          | PDZ binding motif                                        | 2nd PDZ domain                                | [8]       |
| MAST1           | PDZ binding motif                                        | PDZ domain                                    | [9]       |
| MAST2           | PDZ binding motif                                        | PDZ domain                                    | [9, 10]   |
| MAST3           | PDZ binding motif                                        | PDZ domain                                    | [9, 11]   |
| DLG1            | PDZ binding motif                                        | 2nd PDZ domain                                | [10]      |



Sequence alignments for PTEN C-tail interacting proteins

Nephrilysin

|               | Cytoplasmic domain                                                                                                                                                                                                                                                                                                                                                                                                                                                                                                                                                 |
|---------------|--------------------------------------------------------------------------------------------------------------------------------------------------------------------------------------------------------------------------------------------------------------------------------------------------------------------------------------------------------------------------------------------------------------------------------------------------------------------------------------------------------------------------------------------------------------------|
| Vertebrates   | <i>Homo sapiens</i> 15 19 21 25<br>TPKPKKKQRWT<br><i>Macaca mulatta</i><br>TPKPKKKQRWT<br><i>Sus scrofa</i><br>TPKPKKKQRWT<br><i>Mus musculus</i><br>APKPKKKQRWT<br><i>Rattus norvegicus</i><br>APKPKKKQRWT<br><i>O. cuniculus</i><br>TPKPKKKQRWT<br><i>Pteropus alecto</i><br>TPKPKKKQRWT<br><i>Gallus gallus</i><br>APKPKKKLRWS<br><i>Anolis carolinensis</i><br>SPKPKKKQRWS<br><i>Oryzias latipes</i><br>TPKSAKKPRWT<br>Crassostrea gigas<br>LSFKKKQPR-T<br>Bombyx mori<br>RPRDPAEKRW<br>C. quinquefasciatus<br>-RKEDSG--CH<br>Ixodes scapularis<br>-ARDLKSIPCL |
| Invertebrates |                                                                                                                                                                                                                                                                                                                                                                                                                                                                                                                                                                    |

NHERF1

| Vertebrates   | <i>Homo sapiens</i> 32 37 42<br>KGKLGQYIRLV<br><i>Macaca mulatta</i><br>KGKLGQYIRLV<br><i>Bos taurus</i><br>KGKVGQYIRL<br><i>Canis familiaris</i><br>KGKVGQFIRLV<br><i>Mus musculus</i><br>KGKVGQFIRLV<br><i>Rattus norvegicus</i><br>KGKVGQFIRLV<br><i>Gallus gallus</i><br>KGKPGQYIRLV<br><i>Xenopus laevis</i><br>KRSRSGYVRLV<br><i>Oryzias latipes</i><br>KGKTGFIRLV<br>Latimeria chalumnae<br>KGKTGFIRLV<br>Crassostrea gigas<br>RGKAGQFIGKV<br>Ascaris suum<br>RGKPFQFIGTV |
|---------------|----------------------------------------------------------------------------------------------------------------------------------------------------------------------------------------------------------------------------------------------------------------------------------------------------------------------------------------------------------------------------------------------------------------------------------------------------------------------------------|
| Invertebrates |                                                                                                                                                                                                                                                                                                                                                                                                                                                                                  |

NHERF2

| Vertebrates | <i>Homo sapiens</i> 29 34 39<br>KGRRGQFIRRV<br><i>Macaca mulatta</i><br>KGRRGQFIRRV<br><i>Bos taurus</i><br>KGRRGQFIRRV<br><i>Canis familiaris</i><br>KGRRGQFIRRV<br><i>Mus musculus</i><br>KGRRGQFIRRV<br><i>Rattus norvegicus</i><br>KGRRGQFIRRV<br><i>Gallus gallus</i><br>KGKSGQFIRKV<br><i>Xenopus laevis</i><br>KGKSGQYIRKV<br>Oryzias latipes_1<br>KGKSGQYIRKV<br>Oryzias latipes_2<br>RNRGGQFIRNV |
|-------------|-----------------------------------------------------------------------------------------------------------------------------------------------------------------------------------------------------------------------------------------------------------------------------------------------------------------------------------------------------------------------------------------------------------|

MSP58

|               | FHA domain                                                                                                                                                                                                                                                                                                                                                                                                                                                                                                                                                                                                                                                                                                                                                                                                                                                                                                                                                                                                                                                                                                                                                                                                                                                                                                                                                                              |
|---------------|-----------------------------------------------------------------------------------------------------------------------------------------------------------------------------------------------------------------------------------------------------------------------------------------------------------------------------------------------------------------------------------------------------------------------------------------------------------------------------------------------------------------------------------------------------------------------------------------------------------------------------------------------------------------------------------------------------------------------------------------------------------------------------------------------------------------------------------------------------------------------------------------------------------------------------------------------------------------------------------------------------------------------------------------------------------------------------------------------------------------------------------------------------------------------------------------------------------------------------------------------------------------------------------------------------------------------------------------------------------------------------------------|
| Vertebrates   | 363 419<br><i>Homo sapiens</i><br>EITLGRATKDNQIDVDLSLEGPAAKISRKQGVIKLNNGDFFIANEGRRPIYIDGRP<br><i>Macaca mulatta</i><br>EITLGRATKDNQIDVDLSLEGPAAKISRKQGVIKLNNGDFFIANEGRRPIYIDGRP<br><i>Bos taurus</i><br>EITLGRATKDNQIDVDLSLEGPAAKISRKQGVIKLNNGDFFIANEGRRPIYIDGRP<br><i>Canis familiaris</i><br>EITLGRATKDNQIDVDLSLEGPAAKISRKQGVIKLNNGDFFIANEGRRPIYIDGRP<br><i>Mus musculus</i><br>EITLGRATKDNQIDVDLSLEGPAAKISRKQGVIKLNNGDFFIANEGRRPIYIDGRP<br><i>Rattus norvegicus</i><br>EITLGRATKDNQIDVDLSLEGPAAKISRKQGVIKLNNGDFFIANEGRRPIYIDGRP<br><i>Gallus gallus</i><br>EITLGRATKDNQIDVDLALLEGPAWKISRKQGVIKLNNGDFFIANEGRRPIYIDGRP<br><i>Xenopus laevis</i><br>EITLGRATKDNQIDVDLSLEGPAAKISRKQGVIKLNNGDFFIANEGRAIYIDGRP<br><i>Oryzias latipes</i><br>EITLGRATKDKQVDVDLSLEGPAAKISRKQGI I KLNNGDFFIANEGRRPIYIDGRP<br>Latimeria chalumnae<br>EITLGRATKDNQIDVDLSLEGPAAKISRKQGI I KLNNGDFFIANEGRRVYIDGRP<br>Crassostrea gigas<br>EITLGRATKDNQIDVDLSLEGPAAKISRKQGI I KLRNSGDFFLANEGKRPFYVDGKA<br>Danaus plexippus<br>EIAVGRSTRDHTIDVDLSLEGPAAKISRKQATIRLRNSGDFFMSSEKRPFIYVDGRP<br>C. quinquefasciatus<br>EIVFGRSTKDATVDVDFSLGGPAYKISRKQGTIKLRNSGDFFITNEGKRPLYIDGTA<br>Ixodes scapularis<br>EITIGRATKDSRIDVDLSLEGPAAKISRKQGVVILRNTEFTIANEGKRPIYIDGKRP<br>Trichinella spiralis<br>--TDKSPESVKTIINEITKGGSSVKCGQQIDKLTVRGGSE-----<br>C. elegans<br>SVTMGRASLNEKIDIDLSEKGPATKVRKQQAIVICHVADDKFTIQNVGQRIMYVDSKP |
| Invertebrates |                                                                                                                                                                                                                                                                                                                                                                                                                                                                                                                                                                                                                                                                                                                                                                                                                                                                                                                                                                                                                                                                                                                                                                                                                                                                                                                                                                                         |

Sharpin

|             | UBL domain                                                                                                                                                                                                                                                                                                                                                                                                                                                                                                                                                                                                                                                                                                                              |
|-------------|-----------------------------------------------------------------------------------------------------------------------------------------------------------------------------------------------------------------------------------------------------------------------------------------------------------------------------------------------------------------------------------------------------------------------------------------------------------------------------------------------------------------------------------------------------------------------------------------------------------------------------------------------------------------------------------------------------------------------------------------|
| Vertebrates | 240 300<br><i>Homo sapiens</i><br>ALQVHPHCTVAALQEQVFSELGFPFAVQRWVIGRCLCVPERSLASYGVRQDGPFAFLYLLS<br><i>Macaca mulatta</i><br>ALQVHPHCTVAALQEQVFSELGFPFAVQRWVIGRCLCVPERSLASYGVRQDGPFAFLYLLS<br><i>Bos taurus</i><br>SLQVHPHCTIRALQEQVFSEFGFPFAVQRWVIGRCLCVPEHSLAFYGVQRDGPFAFLYLLS<br><i>Sus scrofa</i><br>SLQVHPHCTIRALQEQVFSEFGFPFAVQRWVIGRCLCAPECSLASYGVRDGPFAFLYLLS<br><i>Mus musculus</i><br>SLQVHPHCTIATLQEQVFSEFGFPFAVQRWVIGQCLCVPERSLASYGVRDGPFAFLYLLS<br><i>Canis familiaris</i><br>SLKIHPHCSIAALQEQVFSEFGFPFAVQRWVIGRCLCMPERSLASYGVSDQDGPFAFLYLLS<br><i>Rattus norvegicus</i><br>SLQIHPHCSIAALQEQVFSEFGFPFAVQRWVIGRCLCMPERSLASYGVSDQDGPFAFLYLLS<br>Takifugu rubripes<br>TVKVFPHMTAALKQQVFLEYGFHPVQRWVIGQCLCADQRSASYGVHGDGTAFYLLS |

PREX2

|             |                            | 245 | PH domain                                                                                                             | 361 |
|-------------|----------------------------|-----|-----------------------------------------------------------------------------------------------------------------------|-----|
| Vertebrates | <i>Homo sapiens</i>        |     | EMLMCGVLLKISSGNIQERVFFLFDNLLVYCKRKHRLKNSKASTDGHRYLFRGRINTEVMEVENVDDGTADFHSSGHIVVNGWKIHNTAKNKWFVCMAKTPEEKHEWFEAILKERE  |     |
|             | <i>Bos taurus</i>          |     | EMLMCGVLLKISSGNIQERVFFLFDNLLVYCKRKHRLKNSKASTDGHRYLFRGRINTEVMEVENVDDGTADFHSSGHIVVNGWKIHNTAKNKWFVCMAKTPEEKHEWFEAILKERE  |     |
|             | <i>Canis familiaris</i>    |     | EMLMCGVLLKISSGNIQERVFFLFDNLLVYCKRKHRLKNSKASTDGHRYLFRGRINTEVMEVENVDDGTADFHSSGHIVVNGWKIHNTAKNKWFVCMAKTPEEKHEWFEAILKERE  |     |
|             | <i>Mus musculus</i>        |     | EMLMCGVLLKISSGNIQERVFFLFDNLLVYCKRKHRLKNSKASTDGHRYLFRGRINTEVMEVENVDDGTADFHSSGHIVVNGWKIHNTAKNKWFVCMAKTPEEKHEWFEAILKERE  |     |
|             | <i>Gallus gallus</i>       |     | EMLRSGLLKISAGNIQERIFFLFDNLLVYCKKHRLKNSKASTDGHRYLFRGRINTEVMEVENVDDGTADYHSSGHTVINNGWKIHNTAKNKWFVCMAKTPEEKQEWLEAILKERE   |     |
|             | <i>Anolis carolinensis</i> |     | EMLMCGVLLKISAGNIQERVFFLFDNLLVYCKRKHRLKNSKTSSEGHRYLFRGRINTEVMEVENVDDGTADYHSSGHIVLNGWKIHNTAKNKWFVCMAKTPEEKQEWLEAILKERE  |     |
|             | <i>Xenopus tropicalis</i>  |     | EMLMHGVLLKISSGNIQDRVFFLFDNLLVYCKRQRRLKNNKASTDGHRYIFRGRINTEVMEVENVDDGTADFHSSGNTVVNGWKIHNTAKNKWFVCMAKTPEEKQEWLEAILKERE  |     |
|             | <i>Takifugu rubripes</i>   |     | EILLMHGVLLKISAGNIQERIFFLFDKLLVYCKKNNRRLKNSKATEGPRYLFRGRINTEVMEVENVDDGTADYHSSGNIVNNGWKIHNTAKNKWFVCMAKTPEEKQEWLEAIMKERE |     |
|             | <i>Oryzias latipes</i>     |     | EMLKQGVLLKISAGNIQERIFFLFDKLLVYCKRNNRRLKNSKATSEGPRLFRGRINTEVMEVENVDDGTADYHSSGNIVNNGWKIHNTAKNKWFVCMANTPEEKQEWLEAIMQERE  |     |

DLG1

|             |                            | 319 | PDZ2 domain                                                                            | 405 |
|-------------|----------------------------|-----|----------------------------------------------------------------------------------------|-----|
| Vertebrates | <i>Homo sapiens</i>        |     | EIKLIGPKGLGFSIAGGVGNQHIPGDNSIYVTKIIEGGAHKDGLQIGDKLLAVNNVCLEEVTHEEAVTALKNTSDFVYLKVAKP   |     |
|             | <i>Macaca mulatta</i>      |     | EIKLIGPKGLGFSIAGGVGNQHIPGDNSIYVTKIIEGGAHKDGLQIGDKLLAVNNVCLEEVTHEEAVTALKNTSDFVYLKVAKP   |     |
|             | <i>Canis familiaris</i>    |     | EIKLIGPKGLGFSIAGGVGNQHIPGDNSIYVTKIIEGGAHKDGLQIGDKLLAVNSVCLEEVTHEEAVTALKNTSDFVYLKVAKP   |     |
|             | <i>Mus musculus</i>        |     | EIKLIGPKGLGFSIAGGVGNQHIPGDNSIYVTKIIEGGAHKDGLQIGDKLLAVNSVCLEEVTHEEAVTALKNTSDFVYLKVAKP   |     |
|             | <i>Rattus norvegicus</i>   |     | EIKLIGPKGLGFSIAGGVGNQHIPGDNSIYVTKIIEGGAHKDGLQIGDKLLAVNSVCLEEVTHEEAVTALKNTSDFVYLKVAKP   |     |
|             | <i>Xenopus tropicalis</i>  |     | DIKLVKGPGLGFSIAGGVGNQHIPGDNSIYVTKIIEGGAHKDGLRLQIGDKLLAVNTVCLEEVSHEDAVTALKNTSDFVNLKVAKP |     |
|             | <i>Danio rerio</i>         |     | DVKLVKGPGLGFSIAGGVGNQHIPGDNSIYTKIIEGGAHKDGLRLQIGDKLLAVNAVCLEEVTHEDAVAALKNTPDVVYLKVAKP  |     |
|             | <i>Oryzias latipes</i>     |     | EIKLVKGPGLGFSIAGGVGNQHIPGDNSIYVTKIIEGGAHKDGLSLQIGDKLLAVNSSCLEEVSHEDAVTALKNTPDVVYLKVAKP |     |
|             | <i>Latimeria chalumnae</i> |     | EIKLVKGPGLGFSIAGGVGNQHIPGDNSIYVTKIIEGGAHKDGLRLQIGDKLLAVNTVCLEEVTHEDAVTALKNTSDIVYLKVAKP |     |

MAGI-1

|                     |                           | 472                 | PDZ2 domain                                                                                                                                                                                                | 554                                                                                                                                                                                                        |  |
|---------------------|---------------------------|---------------------|------------------------------------------------------------------------------------------------------------------------------------------------------------------------------------------------------------|------------------------------------------------------------------------------------------------------------------------------------------------------------------------------------------------------------|--|
| Vertebrates         | <i>Homo sapiens</i>       |                     | HTKLRKSSRGFGFTVVGDE---PDEFLQIKSLVLDGPAALDGKMETGDVIVSVNDTCVLGHTHAQVVKIFQSIPIGASVDLELCR                                                                                                                      |                                                                                                                                                                                                            |  |
|                     | <i>Macaca mulatta</i>     |                     | HTKLRKSSRGFGFTVVGDE---PDEFLQIKSLVLDGPAALDGKMETGDVIVSVNDTCVLGHTHAQVVKIFQSIPIGASVDLELCR                                                                                                                      |                                                                                                                                                                                                            |  |
|                     | <i>Mus musculus</i>       |                     | HTKLRKSSRGFGFTVVGDE---PDEFLQIKSLVLDGPAALDGKMETGDVIVSVNDTCVLGHTHAQVVKIFQSIPIGASVDLELCR                                                                                                                      |                                                                                                                                                                                                            |  |
|                     | <i>Rattus norvegicus</i>  |                     | HTKLRKSSRGFGFTVVGDE---PDEFLQIKSLVLDGPAALDGKMETGDVIVSVNDTCVLGHTHAQVVKIFQSIPIGASVDLELCR                                                                                                                      |                                                                                                                                                                                                            |  |
|                     | <i>Xenopus tropicalis</i> |                     | HTKLRKSSRGFGFTVVGDE---PDEFLQIKSLVLDGPAALDGKMETGDVIVSVNDTCVLGYTHAQVVKIFQSIPIGESVDLELCR                                                                                                                      |                                                                                                                                                                                                            |  |
|                     | <i>Danio rerio</i>        |                     | NTKLKSSRRGFGFTVVGDE---PDEFLQIKSLVLDGPAALDGKMETGDVIVSVNDTCVLGYTHAQVVKIFQSIPIGSMVDLELCR                                                                                                                      |                                                                                                                                                                                                            |  |
|                     | <i>Oryzias latipes_1</i>  |                     | NTKLKSSRRGFGFTVVGDE---PDEFLQIKSLVLDGPAALDGKMETGDVIVSVNDTCVLGYTHAQVVKIFQSIPIGSMVNLLELCR                                                                                                                     |                                                                                                                                                                                                            |  |
|                     | <i>Oryzias latipes_2</i>  |                     | NTKLKSSRRGFGFTVVGDE---PDEFLQIKSLVLDGPAALDGKMETGDVIVSVNDTCVLGYTHAQVVKIFQSIPIGSMVDLTLR                                                                                                                       |                                                                                                                                                                                                            |  |
|                     | Invertebrates             | <i>C. elegans_1</i> |                                                                                                                                                                                                            | STKIVKGA <del>KL</del> GF <del>TL</del> IGN <del>D</del> SSSRGDE <del>FI</del> QVKS <del>VL</del> SGG <del>PAA</del> ANG <del>VLR</del> SGD <del>ILVR</del> VN <del>GRL</del> LLGATQKEACDVFVAIPVNEAVDIQVCR |  |
|                     |                           | <i>C. elegans_2</i> |                                                                                                                                                                                                            | STKIVKGA <del>KL</del> GF <del>TL</del> IGN <del>D</del> SSSRGDE <del>FI</del> QVKS <del>VL</del> SGG <del>PAA</del> ANG <del>VLR</del> SGD <del>ILVR</del> VN <del>GRL</del> LLGATQKEACDVFVAIPVNEAVDIQVCR |  |
| <i>C. elegans_3</i> |                           |                     | STKIVKGA <del>KL</del> GF <del>TL</del> IGN <del>D</del> SSSRGDE <del>FI</del> QVKS <del>VL</del> SGG <del>PAA</del> ANG <del>VLR</del> SGD <del>ILVR</del> VN <del>GRL</del> LLGATQKEACDVFVAIPVNEAVDIQVCR |                                                                                                                                                                                                            |  |
| <i>C. elegans_4</i> |                           |                     | STKIVKGA <del>KL</del> GF <del>TL</del> IGN <del>D</del> SSSRGDE <del>FI</del> QVKS <del>VL</del> SGG <del>PAA</del> ANG <del>VLR</del> SGD <del>ILVR</del> VN <del>GRL</del> LLGATQKEACDVFVAIPVNEAVDIQVCR |                                                                                                                                                                                                            |  |
| <i>C. elegans_5</i> |                           |                     | STKIVKGA <del>KL</del> GF <del>TL</del> IGN <del>D</del> SSSRGDE <del>FI</del> QVKS <del>VL</del> SGG <del>PAA</del> ANG <del>VLR</del> SGD <del>ILVR</del> VN <del>GRL</del> LLGATQKEACDVFVAIPVNEAVDIQVCR |                                                                                                                                                                                                            |  |

MAGI-2

|             |                           | 426 | PDZ2 domain                                                                                                                                                                                   | 510 |
|-------------|---------------------------|-----|-----------------------------------------------------------------------------------------------------------------------------------------------------------------------------------------------|-----|
| Vertebrates | <i>Homo sapiens</i>       |     | STTLKKS <del>NMG</del> FGFTII <del>IG</del> DE <del>P</del> DEFLQVKS <del>VI</del> PDG <del>PAA</del> QDGKMETGDVIVYINEV <del>CV</del> LGHTHADVVKLFQSVPIGQSVNLVLCRGY                           |     |
|             | <i>Macaca mulatta</i>     |     | STTLKKS <del>NMG</del> FGFTII <del>IG</del> DE <del>P</del> DEFLQVKS <del>VI</del> PDG <del>PAA</del> QDGKMETGDVIVYINEV <del>CV</del> LGHTHADVVKLFQSVPIGQSVNLVLCRGY                           |     |
|             | <i>Mus musculus</i>       |     | STTLKKS <del>NMG</del> FGFTII <del>IG</del> DE <del>P</del> DEFLQVKS <del>VI</del> PDG <del>PAA</del> QDGKMETGDVIVYINEV <del>CV</del> LGHTHADVVKLFQSVPIGQSVNLVLCRGY                           |     |
|             | <i>Rattus norvegicus</i>  |     | STTLKKS <del>NMG</del> FGFTII <del>IG</del> DE <del>P</del> DEFLQVKS <del>VI</del> PDG <del>PAA</del> QDGKMETGDVIVYINEV <del>CV</del> LGHTHADVVKLFQSVPIGQSVNLVLCRGY                           |     |
|             | <i>Xenopus tropicalis</i> |     | ST <del>TL</del> KKS <del>NMG</del> FGFTII <del>IG</del> DE <del>P</del> DEFLQVKS <del>VI</del> PDG <del>PAA</del> QDGKMETGDVIVYINEA <del>CV</del> LG <del>Y</del> THADVVKIFQSVPIGQSVNLVLCRGY |     |
|             | <i>Danio rerio</i>        |     | ST <del>PL</del> QK <del>S</del> NMGFGFTII <del>IG</del> DE <del>P</del> DEFLQVKS <del>VI</del> PDG <del>PAA</del> QDGK <del>MA</del> TGDVIVYIND <del>V</del> CVLGTTHADVVKLFQSVPIGQSVTLVLCRGY |     |
|             | <i>Oryzias latipes_1</i>  |     | ST <del>SL</del> QK <del>S</del> NMGFGFTII <del>IG</del> DE <del>P</del> DEFLQVKS <del>VI</del> PDG <del>PAA</del> QDGK <del>MA</del> TGDVIVYIND <del>V</del> CVLGTTHADVVKIFQSIPIGQSVTLVLCRGY |     |
|             | <i>Oryzias latipes_2</i>  |     | ST <del>AL</del> QK <del>S</del> NMGFGFTII <del>IG</del> DE <del>P</del> DEFLQVKS <del>VI</del> PDG <del>PAA</del> QDGK <del>MD</del> TGDVIVYIND <del>I</del> CVLGTTHADVVKLFQSVPIGQSVTLVLCRGY |     |

MAGI-3

|             |                           | 435 | PDZ2 domain                                                                                                                                                                                                                      | 517 |
|-------------|---------------------------|-----|----------------------------------------------------------------------------------------------------------------------------------------------------------------------------------------------------------------------------------|-----|
| Vertebrates | <i>Homo sapiens</i>       |     | RASLKKSTMGFGFTII <del>IG</del> DRPDEFLQVKNVLDGPA <del>AQ</del> DGK <del>IA</del> PGDVIVDINGN <del>CV</del> LGHTHADV <del>VQ</del> MFQLVPV <del>NQ</del> YVNLTLR                                                                  |     |
|             | <i>Macaca mulatta</i>     |     | RASLKKSTMGFGFTII <del>IG</del> DRPDEFLQVKNVLDGPA <del>AQ</del> DGK <del>IA</del> PGDVIVDINGN <del>CV</del> LGHTHADV <del>VQ</del> MFQLVPV <del>NQ</del> YVNLTLR                                                                  |     |
|             | <i>Mus musculus</i>       |     | RASLKKSTMGFGFTII <del>IG</del> DRPDEFLQVKNVLDGPA <del>AQ</del> DGK <del>IA</del> PGDVIVDINGN <del>CV</del> LGHTHADV <del>VQ</del> MFQLVPV <del>NQ</del> YVNLTLR                                                                  |     |
|             | <i>Rattus norvegicus</i>  |     | RASLKKSTMGFGFTII <del>IG</del> DRPDEFLQVKNVLDGPA <del>AQ</del> DGK <del>MA</del> PGDVIVDINGN <del>CV</del> LGHTHADV <del>VQ</del> MFQLVPV <del>NQ</del> YVNLTLR                                                                  |     |
|             | <i>Xenopus tropicalis</i> |     | HTSLKKS <del>AM</del> GF <del>GT</del> II <del>IG</del> DRPDEFLQVKNVLDGPA <del>AQ</del> DGK <del>IA</del> PGDVIVDING <del>T</del> CVLGH <del>THA</del> EVVQMFQLP <del>IN</del> QYV <del>NM</del> TLR                             |     |
|             | <i>Danio rerio</i>        |     | R <del>TT</del> LKKS <del>PQ</del> GF <del>GT</del> II <del>IG</del> DRPDEFLQVKNVLDGPA <del>AH</del> DN <del>K</del> IASGDVIVDINGA <del>CV</del> LK <del>GT</del> HADV <del>VQ</del> MFQ <del>SI</del> PV <del>NQ</del> YVDMVLCR |     |
|             | <i>Oryzias latipes_1</i>  |     | H <del>TT</del> LKKS <del>LH</del> GF <del>GT</del> II <del>IG</del> DRPDEFLQVKNVLDGPA <del>AH</del> D <del>K</del> KIASGDVIVEINEA <del>CV</del> LK <del>GT</del> HADV <del>VQ</del> MFQ <del>SI</del> PV <del>NQ</del> YVDMVLCR |     |
|             | <i>Oryzias latipes_2</i>  |     | HTSLKKS <del>SQ</del> GF <del>GT</del> II <del>IG</del> DRPDEFLQVKNVLDGPA <del>AQ</del> DN <del>K</del> MASGDVIVEIN <del>RM</del> CVLGR <del>TH</del> PEV <del>VK</del> MFQ <del>SVP</del> INH <del>Y</del> VDMVLCR              |     |

MAST1

|             |                            | 967 | PDZ domain | 1055 |   |   |   |   |   |   |   |   |   |   |   |   |   |   |   |   |   |   |   |   |   |   |   |   |   |   |   |   |   |   |   |   |   |   |   |   |   |   |   |   |   |   |   |   |   |   |   |   |   |   |   |   |   |   |   |   |   |   |   |   |   |   |   |   |   |   |   |   |   |   |   |   |   |   |   |   |   |   |   |   |   |   |   |
|-------------|----------------------------|-----|------------|------|---|---|---|---|---|---|---|---|---|---|---|---|---|---|---|---|---|---|---|---|---|---|---|---|---|---|---|---|---|---|---|---|---|---|---|---|---|---|---|---|---|---|---|---|---|---|---|---|---|---|---|---|---|---|---|---|---|---|---|---|---|---|---|---|---|---|---|---|---|---|---|---|---|---|---|---|---|---|---|---|---|---|---|
| Vertebrates | <i>Homo sapiens</i>        | P   | I          | T    | I | Q | R | S | G | K | Y | G | F | T | L | R | A | I | R | V | M | G | D | S | D | V | Y | S | V | H | H | I | V | W | H | V | E | E | G | G | P | A | Q | E | A | G | L | C | A | G | D | L | I | T | H | V | N | G | E | P | V | H | G | M | V | H | P | E | V | V | E | L | L | K | S | G | N | K | V | A | V | T | T | T | P | F | E |
|             | <i>Macaca mulatta</i>      | P   | I          | T    | I | Q | R | S | G | K | Y | G | F | T | L | R | A | I | R | V | M | G | D | S | D | V | Y | S | V | H | H | I | V | W | H | V | E | E | G | G | P | A | Q | E | A | G | L | C | A | G | D | L | I | T | H | V | N | G | E | P | V | H | G | M | V | H | P | E | V | V | E | L | L | K | S | G | N | K | V | A | V | T | T | T | P | F | E |
|             | <i>Canis familiaris</i>    | P   | I          | T    | I | Q | R | S | G | K | Y | G | F | T | L | R | A | I | R | V | M | G | D | S | D | V | Y | S | V | H | H | I | V | W | H | V | E | E | G | G | P | A | Q | E | A | G | L | C | A | G | D | L | I | T | H | V | N | G | E | P | V | H | G | M | V | H | P | E | V | V | E | L | L | K | S | G | N | K | V | A | V | T | T | T | P | F | E |
|             | <i>Mus musculus</i>        | P   | I          | T    | I | Q | R | S | G | K | Y | G | F | T | L | R | A | I | R | V | M | G | D | S | D | V | Y | S | V | H | H | I | V | W | H | V | E | E | G | G | P | A | Q | E | A | G | L | C | A | G | D | L | I | T | H | V | N | G | E | P | V | H | G | M | V | H | P | E | V | V | E | L | L | K | S | G | N | K | V | A | V | T | T | T | P | F | E |
|             | <i>Rattus norvegicus</i>   | P   | I          | T    | I | Q | R | S | G | K | Y | G | F | T | L | R | A | I | R | V | M | G | D | S | D | V | Y | S | V | H | H | I | V | W | H | V | E | E | G | G | P | A | Q | E | A | G | L | C | A | G | D | L | I | T | H | V | N | G | E | P | V | H | G | M | V | H | P | E | V | V | E | L | L | K | S | G | N | K | V | A | V | T | T | T | P | F | E |
|             | <i>Anolis carolinensis</i> | P   | I          | T    | I | Q | R | S | G | K | Y | G | F | T | L | R | A | I | R | V | M | G | D | S | D | V | Y | S | V | H | H | I | V | W | H | V | E | E | G | G | P | A | E | A | G | L | C | A | G | D | L | I | T | H | V | N | G | E | P | V | H | G | L | V | H | T | E | V | V | E | L | L | K | S | G | N | K | V | M | V | T | T | T | P | F | E |   |
|             | <i>Xenopus tropicalis</i>  | P   | I          | C    | I | Q | R | S | G | K | Y | G | F | T | L | R | A | I | R | V | M | G | E | S | D | V | Y | S | V | Q | H | I | V | W | H | V | E | E | G | G | P | A | E | A | G | L | C | A | G | D | L | I | T | H | N | G | E | P | V | H | G | L | V | H | T | E | V | V | E | L | L | K | S | G | N | K | V | L | V | T | T | T | P | F | E |   |   |
|             | <i>Oryzias latipes</i>     | P   | I          | T    | H | R | S | G | K | Y | G | F | T | L | R | A | I | R | V | M | G | D | S | D | V | Y | S | V | H | H | I | V | W | H | V | E | E | G | G | P | A | Q | E | A | G | L | R | A | G | D | L | I | T | H | V | N | G | E | S | V | H | G | L | V | H | T | E | V | V | E | L | L | K | S | G | N | K | V | T | T | T | P | F | E |   |   |   |
|             | <i>Latimeria chalumnae</i> | P   | I          | T    | H | R | S | G | K | Y | G | F | T | L | R | A | I | R | V | M | G | D | S | D | V | Y | S | V | H | H | I | V | W | H | V | E | E | G | G | P | A | E | A | G | L | C | A | G | D | L | I | T | H | V | N | G | E | P | V | H | G | L | V | H | T | E | V | V | E | L | L | K | S | G | N | K | V | T | T | T | P | F | E |   |   |   |   |

MAST2

|             |                            | 1104 | PDZ domain | 1192 |   |   |   |   |   |   |   |   |   |   |   |   |   |   |   |   |   |   |   |   |   |   |   |   |   |   |   |   |   |   |   |   |   |   |   |   |   |   |   |   |   |   |   |   |   |   |   |   |   |   |   |   |   |   |   |   |   |   |   |   |   |   |   |   |   |   |   |   |   |   |   |   |   |   |   |   |   |   |   |   |   |   |
|-------------|----------------------------|------|------------|------|---|---|---|---|---|---|---|---|---|---|---|---|---|---|---|---|---|---|---|---|---|---|---|---|---|---|---|---|---|---|---|---|---|---|---|---|---|---|---|---|---|---|---|---|---|---|---|---|---|---|---|---|---|---|---|---|---|---|---|---|---|---|---|---|---|---|---|---|---|---|---|---|---|---|---|---|---|---|---|---|---|---|
| Vertebrates | <i>Homo sapiens</i>        | P    | P          | I    | I | H | R | A | G | K | Y | G | F | T | L | R | A | I | R | V | M | G | D | S | D | V | Y | T | V | H | H | M | V | W | H | V | E | D | G | G | P | A | S | E | A | G | L | R | Q | G | D | L | I | T | H | V | N | G | E | P | V | H | G | L | V | H | T | E | V | V | E | L | L | K | S | G | N | K | V | A | I | S | T | T | P | L |
|             | <i>Macaca mulatta</i>      | P    | P          | I    | I | H | R | A | G | K | Y | G | F | T | L | R | A | I | R | V | M | G | D | S | D | V | Y | T | V | H | H | M | V | W | H | V | E | D | G | G | P | A | S | E | A | G | L | R | Q | G | D | L | I | T | H | V | N | G | E | P | V | H | G | L | V | H | T | E | V | V | E | L | L | K | S | G | N | K | V | A | I | S | T | T | P | L |
|             | <i>Canis familiaris</i>    | P    | P          | I    | I | H | R | A | G | K | Y | G | F | T | L | R | A | I | R | V | M | G | D | S | D | V | Y | T | V | H | H | M | V | W | H | V | E | D | G | G | P | A | S | E | A | G | L | R | Q | G | D | L | I | T | H | V | N | G | E | P | V | H | G | L | V | H | T | E | V | V | E | L | L | K | S | G | N | K | V | S | I | S | T | T | P | L |
|             | <i>Mus musculus</i>        | P    | P          | I    | I | H | R | A | G | K | Y | G | F | T | L | R | A | I | R | V | M | G | D | S | D | V | Y | T | V | H | H | M | V | W | H | V | E | D | G | G | P | A | S | E | A | G | L | R | Q | G | D | L | I | T | H | V | N | G | E | P | V | H | G | L | V | H | T | E | V | V | E | L | L | K | S | G | N | K | V | S | I | S | T | T | P | L |
|             | <i>Rattus norvegicus</i>   | P    | P          | I    | I | H | R | A | G | K | Y | G | F | T | L | R | A | I | R | V | M | G | D | S | D | V | Y | T | V | H | H | M | V | W | H | V | E | D | G | G | P | A | S | E | A | G | L | R | Q | G | D | L | I | T | H | V | N | G | E | P | V | H | G | L | V | H | T | E | V | V | E | L | L | K | S | G | N | K | V | S | I | S | T | T | P | L |
|             | <i>Anolis carolinensis</i> | P    | P          | I    | I | H | R | A | G | K | Y | G | F | T | L | R | A | I | R | V | M | G | N | S | D | I | Y | T | V | H | H | M | V | W | H | V | E | E | G | G | P | A | S | E | A | G | L | R | E | G | D | L | I | T | H | V | N | G | E | P | V | H | G | L | V | H | T | E | V | V | E | L | L | K | S | G | N | K | V | S | I | S | T | T | P | F |
|             | <i>Xenopus tropicalis</i>  | P    | P          | I    | I | H | R | A | G | K | Y | G | F | T | L | R | A | I | R | V | M | G | E | S | D | V | Y | T | V | H | H | M | V | W | H | V | E | E | D | G | P | A | H | D | A | G | L | R | E | G | D | L | I | T | H | V | N | G | E | P | V | H | G | L | V | H | T | E | V | V | E | L | L | K | S | G | N | K | V | S | I | S | T | T | P | F |
|             | <i>Oryzias latipes</i>     | P    | A          | I    | T | I | H | R | A | G | K | Y | G | F | T | L | R | A | I | R | V | M | G | D | T | N | Y | T | V | H | H | M | V | W | H | V | E | E | G | G | P | A | E | A | G | L | R | E | G | D | L | I | T | H | V | N | G | E | P | V | H | G | L | V | H | T | E | V | V | E | L | L | K | S | G | A | K | V | S | I | S | A | T | T | P | F |
|             | <i>Latimeria chalumnae</i> | P    | P          | I    | I | H | R | A | G | K | Y | G | F | T | L | R | A | I | R | V | M | G | D | T | V | Y | T | V | H | H | M | V | W | H | V | E | D | G | G | P | A | Q | E | A | G | L | R | E | G | D | L | I | T | H | V | N | G | E | P | V | H | G | L | V | H | T | E | V | V | E | L | L | K | S | D | N | K | V | S | I | S | T | T | P | F |   |

MAST3

|             |                            | 950 | PDZ domain | 1038 |   |   |   |   |   |   |   |   |   |   |   |   |   |   |   |   |   |   |   |   |     |   |   |   |   |   |   |   |   |   |   |   |   |   |   |   |   |   |   |   |   |   |   |   |   |   |   |   |   |   |   |   |   |   |   |   |   |   |   |   |   |   |   |   |   |   |   |   |   |   |   |   |   |   |   |   |   |   |   |   |   |   |
|-------------|----------------------------|-----|------------|------|---|---|---|---|---|---|---|---|---|---|---|---|---|---|---|---|---|---|---|---|-----|---|---|---|---|---|---|---|---|---|---|---|---|---|---|---|---|---|---|---|---|---|---|---|---|---|---|---|---|---|---|---|---|---|---|---|---|---|---|---|---|---|---|---|---|---|---|---|---|---|---|---|---|---|---|---|---|---|---|---|---|---|
| Vertebrates | <i>Homo sapiens</i>        | P   | I          | V    | I | H | S | S | G | K | Y | G | F | S | L | R | A | I | R | V | M | G | D | S | D   | V | Y | T | V | H | H | V | W | S | V | E | D | G | S | P | A | Q | E | A | G | L | R | A | G | D | L | I | T | H | I | N | G | E | S | V | L | G | L | V | H | M | D | V | V | E | L | L | K | S | G | N | K | I | S | L | R | T | T | A | L | E |
|             | <i>Macaca mulatta</i>      | P   | I          | V    | I | H | S | S | G | K | Y | G | F | S | L | R | A | I | R | V | M | G | D | S | D   | V | Y | A | V | H | H | V | W | S | V | E | D | G | S | P | A | Q | E | A | G | L | R | A | G | D | L | I | T | H | I | N | G | E | S | V | L | G | L | V | H | M | D | V | V | E | L | L | K | S | G | N | K | I | S | L | R | T | T | A | L | E |
|             | <i>Canis familiaris</i>    | P   | I          | V    | I | H | S | S | G | K | Y | G | F | S | L | R | A | I | R | V | M | G | D | S | D   | V | Y | T | V | H | H | V | W | S | V | E | E | G | S | P | A | Q | E | A | G | L | R | A | G | D | L | I | T | H | I | N | G | E | S | V | L | G | L | V | H | M | D | V | V | E | L | L | K | S | G | N | K | I | A | L | R | T | T | A | L | E |
|             | <i>Mus musculus</i>        | P   | I          | V    | I | H | S | S | G | K | Y | G | F | S | L | R | A | I | R | V | M | G | D | S | D   | V | Y | T | V | H | H | V | W | S | V | E | E | G | S | P | A | Q | E | A | G | L | R | A | G | D | L | I | T | H | I | N | G | E | S | V | L | G | L | V | H | M | D | V | V | E | L | L | K | S | G | N | K | I | S | L | R | T | T | A | L | E |
|             | <i>Rattus norvegicus</i>   | P   | I          | V    | I | H | S | S | G | K | Y | G | F | S | L | R | A | I | R | V | M | G | D | S | D   | V | Y | T | V | H | H | V | W | S | V | E | E | G | S | P | A | Q | E | A | G | L | R | A | G | D | L | I | T | H | I | N | G | E | S | V | L | G | L | V | H | M | D | V | V | E | L | L | K | S | G | N | K | I | S | L | R | T | T | A | L | E |
|             | <i>Anolis carolinensis</i> | P   | I          | V    | I | H | S | Q | G | K | Y | G | F | T | L | R | A | I | R | V | M | G | D | S | D   | I | Y | A | V | H | H | M | V | S | V | E | E | G | S | P | A | Q | E | A | G | L | R | A | G | D | L | I | T | H | V | N | G | E | S | V | L | G | L | V | H | M | D | V | V | E | L | L | K | S | G | N | K | V | A | L | R | T | T | A | L | E |
|             | <i>Xenopus tropicalis</i>  | P   | I          | I    | H | S | S | G | K | Y | G | F | T | L | R | A | I | R | V | M | G | E | S | D | V   | Y | T | V | H | H | M | V | W | N | V | E | D | G | S | P | A | E | A | G | L | R | A | G | D | L | I | T | H | V | N | G | E | S | V | L | G | L | V | H | M | D | V | V | E | L | L | K | S | G | S | K | V | S | L | R | T | T | P | L | E |   |
|             | <i>Oryzias latipes_1</i>   | P   | I          | V    | I | H | T | S | G | K | F | G | F | T | V | Q | A | I | R | V | M | G | D | S | D   | V | Y | T | V | H | H | M | V | S | S | V | E | E | G | S | L | A | Y | Q | A | G | L | R | T | G | D | L | I | T | H | V | N | G | E | S | V | Q | G | L | V | H | P | E | M | I | E | L | L | K | S | G | K | V | T | L | Q | T | I | A | L | E |
|             | <i>Oryzias latipes_2</i>   | P   | V          | I    | I | H | C | S | G | R | L | G | F | T | L | R | A | I | R | V | M | G | D | T | N</ |   |   |   |   |   |   |   |   |   |   |   |   |   |   |   |   |   |   |   |   |   |   |   |   |   |   |   |   |   |   |   |   |   |   |   |   |   |   |   |   |   |   |   |   |   |   |   |   |   |   |   |   |   |   |   |   |   |   |   |   |   |





# Supplementary Figure S5 ELM output for PTEN

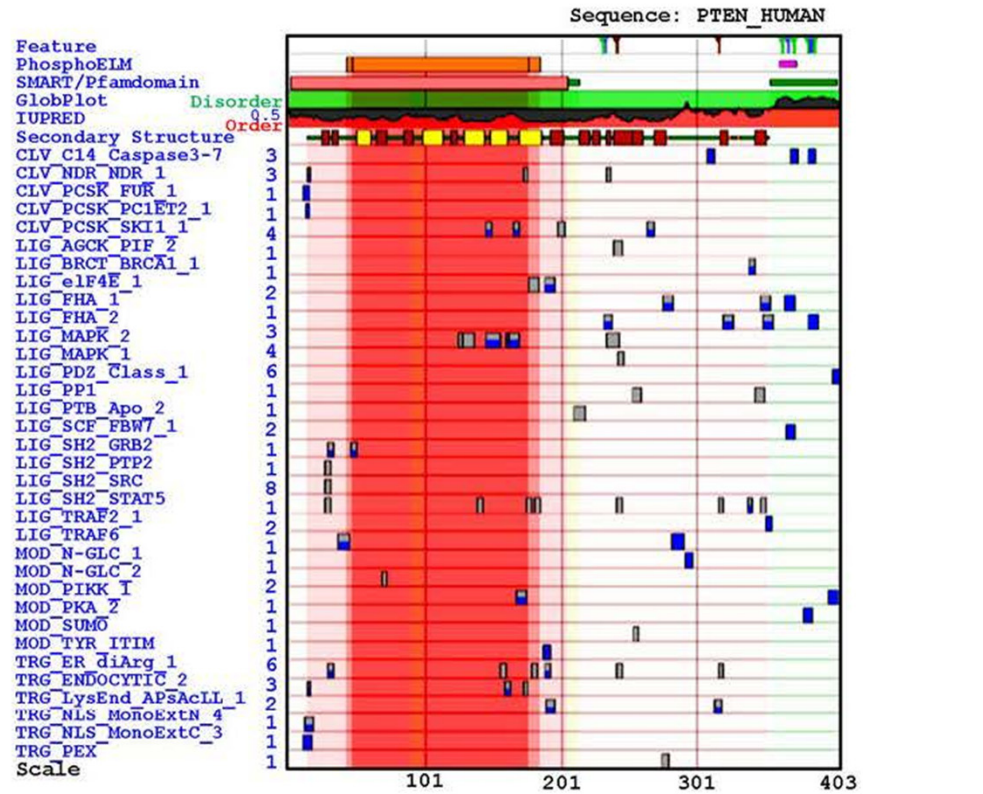

## KEY

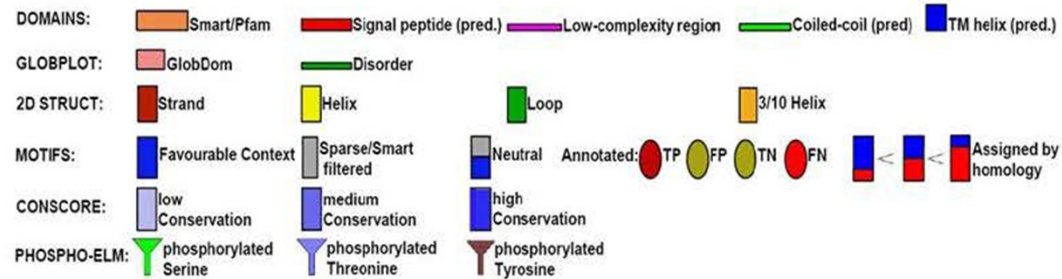



Supplementary Figure S6  
DISPHOS prediction for PTEN

## DISPHOS Results

```
>sp|P60484|PTEN_HUMAN Phosphatidylinositol-3,4,5-trisphosphate 3-phosphatase and dual-specificity
protein phosphatase PTEN OS=Homo sapiens GN=PTEN PE=1 SV=1
MTAIIKEIVSRNKRRYQEDGFDDLDTYIYENIIAMGFPAERLEGVYRNNIDDVVRF LDSKHKNHYKIYNLCAERHYDTAK
FNCRVAQYPFEDHNPPQLELIKPFCEDDLQWLSEDDNHVAAIHCKAGKGR TGVMICAYLLHRGKFLKAQEALDFYGEVRT
RDKKGVTI PSQRRYVYYYSYLLKNHLDYR PVALLFHKMMFETI PMFSGGT CNPQFVVCQLKVKIYSSNSGPTRRDKFMY
FEFPQPLPVCGDIKVEF FHKQNKMLKDKMFFHWVNTFFI PGPEETS EKVENGLSLCDQEIDSICSIERADNDKEYLVLTL
TKNDLDKANKDKANRYF S PNFVKLYFTKTVEEPSNPEASSSTS VT PDVS DNE PDHYRYS DTTDS DPENE PFDEDQHTQI
TKV
```

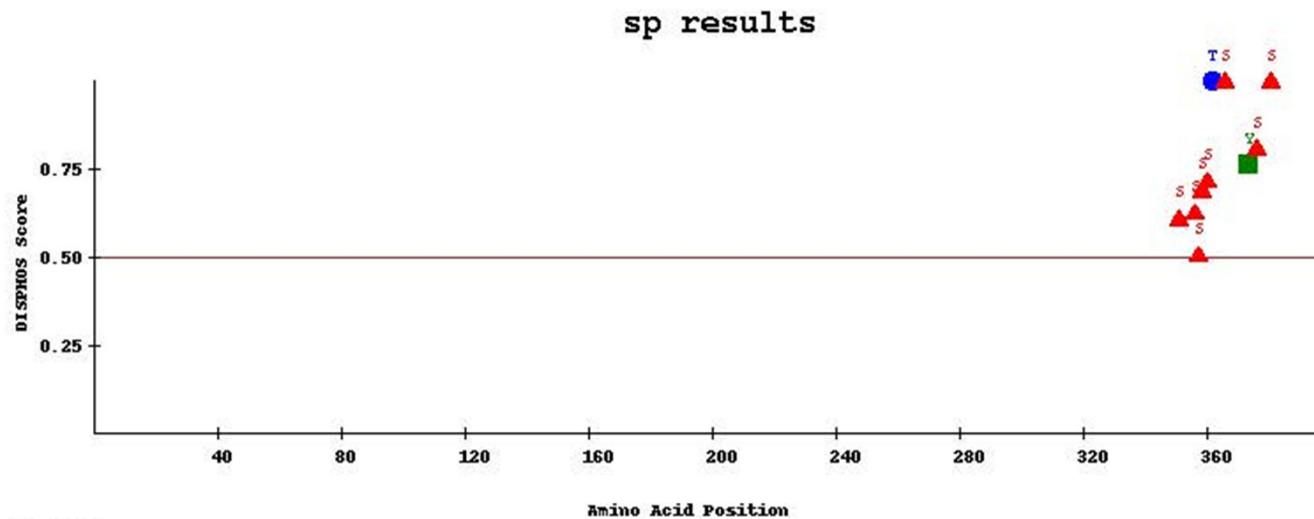

### Statistics

Number of phosphorylated serines: 8 out of 22 (36.364%)  
 Number of phosphorylated threonines: 1 out of 21 (4.762%)  
 Number of phosphorylated tyrosines: 1 out of 23 (4.348%)

| Position | Residue | Score | Sequence  | Yes/No |
|----------|---------|-------|-----------|--------|
| 2        | T       | 0.004 | ***MTAIIK |        |

|     |   |       |            |
|-----|---|-------|------------|
| 10  | S | 0.151 | KEIVSRNKR  |
| 16  | Y | 0.002 | NKRRYQEDG  |
| 26  | T | 0.051 | DLDLTYIYP  |
| 27  | Y | 0.077 | LDLTYIYPN  |
| 29  | Y | 0.012 | LYIYPNII   |
| 46  | Y | 0.038 | LEGVYRNNI  |
| 59  | S | 0.021 | RFLDSKHKN  |
| 65  | Y | 0.011 | HKNHYKIYN  |
| 68  | Y | 0.014 | HYKIYNLCA  |
| 76  | Y | 0.024 | AERHYDTAK  |
| 78  | T | 0.055 | RHYDTAKFN  |
| 88  | Y | 0.008 | RVAQYPFED  |
| 113 | S | 0.039 | DQWLSEDDN  |
| 131 | T | 0.004 | GKGRTGVM I |
| 138 | Y | 0.027 | MICAYLLHR  |
| 155 | Y | 0.215 | ALDFYGEVR  |
| 160 | T | 0.229 | GEVTRDCK   |
| 167 | T | 0.023 | KKGV TIPSQ |
| 170 | S | 0.227 | VTIP SQRRY |
| 174 | Y | 0.011 | SQRRYVYYY  |
| 176 | Y | 0.021 | RRYVYYYSY  |
| 177 | Y | 0.022 | RYVYYSYL   |
| 178 | Y | 0.017 | YVYYSYLL   |
| 179 | S | 0.072 | VYYYSYLLK  |
| 180 | Y | 0.019 | YYYSYLLKN  |
| 188 | Y | 0.057 | NHLDYRPVA  |
| 202 | T | 0.010 | MMFETIPME  |



|     |   |       |           |     |
|-----|---|-------|-----------|-----|
| 207 | S | 0.022 | IPMFSGGTC |     |
| 210 | T | 0.037 | FSGGTCNPQ |     |
| 225 | Y | 0.031 | KVKIYSSNS |     |
| 226 | S | 0.110 | VKIYSSNSG |     |
| 227 | S | 0.159 | KIYSSNSGP |     |
| 229 | S | 0.145 | YSSNSGPTR |     |
| 232 | T | 0.093 | NSGPTRRER |     |
| 240 | Y | 0.080 | DKFMYFEFP |     |
| 277 | T | 0.012 | FWVNTFFIP |     |
| 286 | T | 0.285 | GPEETSEKV |     |
| 287 | S | 0.357 | PEETSEKVE |     |
| 294 | S | 0.137 | VENGSLCDQ |     |
| 302 | S | 0.211 | QEIDSICSI |     |
| 305 | S | 0.392 | DSICSIERA |     |
| 315 | Y | 0.037 | NDKEYLVLT |     |
| 319 | T | 0.010 | YLVLTLTKN |     |
| 321 | T | 0.025 | VLTLTKNDL |     |
| 336 | Y | 0.024 | KANRYFSPN |     |
| 338 | S | 0.243 | NRYFSPNFK |     |
| 346 | Y | 0.016 | KVKLYFTKT |     |
| 348 | T | 0.014 | KLYFTKTVE |     |
| 350 | T | 0.075 | YFTKTVEEP |     |
| 355 | S | 0.611 | VEEPSNPEA | YES |
| 360 | S | 0.628 | NPEASSSTS | YES |
| 361 | S | 0.508 | PEASSSTSV | YES |
| 362 | S | 0.692 | EASSSTSVT | YES |
| 363 | T | 0.064 | ASSSTSVTP |     |

|     |   |       |           |      |
|-----|---|-------|-----------|------|
| 364 | S | 0.718 | SSSTSVTPD | YES  |
| 366 | T | 1.000 | STSVTPDVS | YES* |
| 370 | S | 1.000 | TPDVSDNEP | YES* |
| 377 | Y | 0.765 | EPDHYRYSD | YES  |
| 379 | Y | 0.298 | DHYRYSDTT |      |
| 380 | S | 0.808 | HYRYSDTTD | YES  |
| 382 | T | 0.236 | RYSDTTDSD |      |
| 383 | T | 0.384 | YSDTTDSDP |      |
| 385 | S | 1.000 | DTTDSDPEN | YES* |
| 398 | T | 0.080 | EDQHTQITK |      |
| 401 | T | 0.083 | HTQITKV** |      |

\*An asterisk indicates prediction by similarity to the training sequences

## REFERENCES

1. Sumitomo, M., et al., *Synergy in tumor suppression by direct interaction of neutral endopeptidase with PTEN*. *Cancer Cell*, 2004. **5**(1): p. 67-78.
2. Takahashi, Y., et al., *PTEN tumor suppressor associates with NHERF proteins to attenuate PDGF receptor signaling*. *EMBO J*, 2006. **25**(4): p. 910-20.
3. Okumura, K., et al., *Cellular transformation by the MSP58 oncogene is inhibited by its physical interaction with the PTEN tumor suppressor*. *Proceedings of the National Academy of Sciences of the United States of America*, 2005. **102**(8): p. 2703-2706.
4. Fine, B., et al., *Activation of the PI3K Pathway in Cancer Through Inhibition of PTEN by Exchange Factor P-REX2a*. *Science*, 2009. **325**(5945): p. 1261-1265.
5. He, L., et al., *Shank-interacting protein-like 1 promotes tumorigenesis via PTEN inhibition in human tumor cells*. *J Clin Invest*, 2010. **120**(6): p. 2094-108.
6. Kotelevets, L., et al., *Implication of the MAGI-1b/PTEN signalosome in stabilization of adherens junctions and suppression of invasiveness*. *FASEB J*, 2005. **19**(1): p. 115-7.
7. Wu, X., et al., *Evidence for regulation of the PTEN tumor suppressor by a membrane-localized multi-PDZ domain containing scaffold protein MAGI-2*. *Proc Natl Acad Sci U S A*, 2000. **97**(8): p. 4233-8.
8. Wu, Y., et al., *Interaction of the tumor suppressor PTEN/MMAC with a PDZ domain of MAGI3, a novel membrane-associated guanylate kinase*. *J Biol Chem*, 2000. **275**(28): p. 21477-85.
9. Terrien, E., et al., *Interference with the PTEN-MAST2 interaction by a viral protein leads to cellular relocalization of PTEN*. *Sci Signal*, 2012. **5**(237): p. ra58.
10. Adey, N.B., et al., *Threonine phosphorylation of the MMAC1/PTEN PDZ binding domain both inhibits and stimulates PDZ binding*. *Cancer Research*, 2000. **60**(1): p. 35-37.
11. Valiente, M., et al., *Binding of PTEN to specific PDZ domains contributes to PTEN protein stability and phosphorylation by microtubule-associated serine/threonine kinases*. *J Biol Chem*, 2005. **280**(32): p. 28936-43.

## **SUPPLEMENTARY TABLES**

## **Supplementary Table Legends**

### **Supplementary Table S1: PTEN Primary Interactome.**

Mapped proteins: A list of 40 proteins, within the PTEN interactome, that have been mapped onto the PTEN structure. Approximate regions of PTEN involved in interaction with each of the 40 proteins are known. Unmapped proteins: A list of approx. 350 proteins that are known to interact with PTEN, determined either experimentally or through computational approaches. However, the exact region of PTEN involved in interaction with each of these proteins is yet to be determined. It is important to note that the 350 proteins may interact with PTEN directly or indirectly via another protein or scaffold.

### **Supplementary Table S2: GO of 40 interactome proteins.**

Gene Ontology terms were mapped onto the list of 40 mapped proteins using a controlled vocabulary to describe gene and gene attributes as per the Gene Ontology project (GO) using UniProtKB database. The gene attributes were described under three disjointed categories: cellular component, molecular function and biological process.

### **Supplementary Table S3: Disorder score for mapped proteins.**

A per residue disorder prediction was obtained for each of the 40 mapped proteins of the PTEN interactome using the PONDR-FIT software. A value of 0.5 is used as a cut-off to distinguish between ordered and disordered residues. The number of disordered residues throughout the entire length of the protein is calculated for each of the 40 proteins. Percent disorderliness is calculated as  $[(\text{No. of disordered residues within a given protein} / \text{Total number of amino acid residues in the given protein}) * 100]$ . Protein is classified as disordered if it contains one or more long disordered regions (i.e disordered stretches greater than 30 amino acids). A plot of the percent disorderliness is part of Figure 2.

**Supplementary Table S4: Identification of cancer as the most over represented disease in the primary interactome.**

Functional Analysis using IPA (Ingenuity® Systems, [www.ingenuity.com](http://www.ingenuity.com)) identified the biological functions and/or diseases that were most significant in the primary PTEN interactome. 13 proteins were enriched as cancer-related from the analysis. Right-tailed Fisher's exact test was used to calculate a p-value determining the probability that each biological function and/or disease assigned to that data set is due to chance alone.

**Supplementary Table S5: PTEN Secondary Interactome.**

PTEN secondary interactome was derived using 37 of the 40 primary interacting proteins (individual interacting proteins for each of the primary interacting proteins are listed in separately). Disorder analysis was carried out for each of the secondary interacting proteins (using PONDR-FIT software) and disordered proteins were identified.

**Supplementary Table S6: Disorder analysis of the PTEN-Cancer Interactome.**

Secondary interactome was derived for the 13 cancer-related primary interacting proteins. Disorder analysis identified 193 disordered proteins from the secondary interactome. 31 disordered proteins occurred more than once in the individual interactomes of the 13 cancer related primary interacting proteins.

**Supplementary Table S7: Derivation of PTEN associated cancer hubs using a human cancer signaling map**

PTEN associated cancer network: Network associations for the PTEN related cancer associated genes were derived from the Cancer Signaling Map (Cui et al, 2007, Awan et al, 2007, Li et al, 2012 and Newman et al, 2013). The network was extended by adding PTEN protein-protein interactions from the primary interactome (Figure 2d, Supplementary Table S1) to the signaling map. The extended network

associations were used for visualization and network topology analysis. Topological analysis of PTEN cancer network: Topological analysis identifies p53 as the most significant network hub. PTEN associated cancer network was analyzed using the Network Analysis tool, which calculates topological coefficients to identify topologically important proteins. Based on the statistically relevant scores p53 was identified as the top network hub in the PTEN associated cancer network.

**Supplementary Table S8: Disorder prediction for kinases.**

A per residue disorder prediction was obtained for all kinases that are known to phosphorylate PTEN using the PONDR-VLXT and PONDR-FIT softwares. A value of 0.5 is used as a cut-off to distinguish between ordered and disordered residues. The kinase is classified as disordered if it contains one or more long disordered regions (i.e disordered stretches greater than 30 amino acids). The exact location of the kinase domains is obtained from UniProt. It is observed that all the kinases have a relatively ordered catalytic domain supporting the concept of a D-O interaction between PTEN and a kinase.

**SUPPLEMENTARY TABLE S1**  
**PTEN PRIMARY INTERACTOME: MAPPED PROTEINS**

| Uniprot ID | Protein name | Region of PTEN that the protein interacts with |
|------------|--------------|------------------------------------------------|
| Q15796     | Smad2        | PD                                             |
| P84022     | Smad3        | PD                                             |
| O00308     | WWP2         | AA 100-187 of PTEN (PD)                        |
| P10275     | AR           | PD                                             |
| P10599     | Thioredoxin  | Cys(212) of the C2 domain of PTEN              |
| Q92831     | PCAF         | AA 186-202 of PTEN (C2)                        |
| P49407     | ARRB1        | C2 domain of PTEN                              |
| P32121     | ARRB2        | C2 domain of PTEN                              |
| P35226     | BMI-1        | AAs 186-286 of PTEN (C2)                       |
| Q06830     | Prdx-1       | AA 157-199 of PTEN (C2)                        |
| P42685     | RAK          | C2 domain of PTEN                              |
| P04637     | p53          | C2 domain of PTEN                              |
| Q03135     | CAV          | AA 271-278 (C2)                                |
| Q15831     | STK11        | N-terminal portion of C2 domain                |
| Q14764     | MVP          | C2 domain of PTEN                              |
| Q9NZM5     | PICT-1       | AA 338-348 (C2)                                |
| P08473     | NEP          | AA 379-385 of PTEN (C-tail)                    |
| F1NK41     | Myo5a        | C-tail                                         |
| G3X9Y9     | Myo5b        | C-tail                                         |
| G7MXH2     | Myo5c        | C-tail                                         |
| Q96EZ8     | MSP58        | C-tail                                         |



|        |         |                            |
|--------|---------|----------------------------|
| Q70Z35 | PREX 2  | C-tail                     |
| P30260 | APC 3   | C-tail                     |
| Q9UJX5 | APC 4   | C-tail                     |
| Q9UJX4 | APC 5   | C-tail                     |
| Q9UJX3 | APC 7   | C-tail                     |
| P49452 | Cenpc 1 | C-tail                     |
|        |         |                            |
| P09619 | PDGFRB  | PDZ domain of PTEN         |
| Q12959 | DLG1    | PDZ domain of PTEN         |
| Q96QZ7 | MAGI 1  | PDZ domain of PTEN         |
| O88382 | MAGI2   | PDZ domain of PTEN         |
| Q9HBC4 | MAGI3   | PDZ domain of PTEN         |
| Q9R1L5 | Mast1   | PDZ domain of PTEN         |
| Q60592 | Mast2   | PDZ domain of PTEN         |
| O60307 | Mast3   | PDZ domain of PTEN         |
| O14745 | NHERF 1 | PDZ domain of PTEN         |
| Q15599 | NHERF2  | PDZ domain of PTEN         |
| O00254 | Par3    | PDZ domain of PTEN         |
| P34968 | 5-HTR2C | PDZ domain of PTEN         |
|        |         |                            |
| Q9H0F6 | Sharpin | N- and C- terminus of PTEN |

## PTEN PRIMARY INTERACTOME: UNMAPPED PROTEINS

| Uniprot ID | Protein Name                                                              |
|------------|---------------------------------------------------------------------------|
| P63279     | SUMO-conjugating enzyme UBC9                                              |
| P68036     | Ubiquitin-conjugating enzyme E2 L3                                        |
| P42574     | Caspase-3                                                                 |
| P46934     | E3 ubiquitin-protein ligase NEDD4                                         |
| P0CG48     | Polyubiquitin-C                                                           |
| P03372     | Estrogen receptor                                                         |
| Q81UK1     | Alpha-acetolactate decarboxylase                                          |
| P35222     | Catenin beta-1                                                            |
| P49023     | Paxillin                                                                  |
| Q13464     | ROCK1                                                                     |
| Q9NZM5     | Glioma tumor suppressor candidate region gene 2 protein/p60 (GLTSCR2)     |
| Q01469     | Fatty acid-binding protein, epidermal                                     |
| Q4G0X9     | Coiled-coil domain-containing protein 40                                  |
| Q93084     | Sarcoplasmic/endoplasmic reticulum calcium ATPase 3                       |
| P43487     | Ran-specific GTPase-activating protein                                    |
| P11021     | 78 kDa glucose-regulated protein (GRP 78)                                 |
| P62136     | Serine/threonine-protein phosphatase PP1-alpha catalytic subunit (PPP1CA) |
| P13693     | Translationally-controlled tumor protein                                  |
| P57721     | Poly(rC)-binding protein 3                                                |
| P37802     | Transgelin-2                                                              |
| P19784     | Casein kinase II subunit alpha                                            |
| P31749     | AKT1                                                                      |
| P31751     | AKT2                                                                      |
| Q9Y243     | AKT3                                                                      |
| P02533     | KRT14 keratin 14                                                          |

|        |                                                     |
|--------|-----------------------------------------------------|
| Q99497 | DJ1                                                 |
| Q68EM8 | MAN2C1 protein                                      |
| O60930 | RNH1                                                |
| O95136 | Sphingosine 1-phosphate receptor 2                  |
| Q05586 | Glutamate [NMDA] receptor subunit zeta-1            |
| Q13224 | Glutamate [NMDA] receptor subunit epsilon-2         |
| Q92734 | TRK-fused gene protein                              |
| Q9BT67 | Ndfip 1                                             |
| P17181 | Interferon alpha/beta receptor 1                    |
| Q9Y5S9 | RNA-binding protein 8A                              |
| P04117 | FABP4                                               |
| Q9QYJ3 | HSP40                                               |
| P97298 | Serpinf1                                            |
| Q9R118 | Serine protease HTRA1                               |
| Q8IY57 | YY1-associated factor 2                             |
| Q6PCB0 | von Willebrand factor A domain-containing protein 1 |
| P21796 | Voltage-dependent anion-selective channel protein 1 |
| P68104 | Elongation factor 1-alpha 1                         |
| Q04323 | UBX domain-containing protein 1                     |
| P70698 | CTP synthase 1                                      |
| Q3UEB3 | Poly(U)-binding-splicing factor PUF60               |
| Q8C338 | Isocitrate dehydrogenase                            |
| Q8VEK3 | Heterogeneous nuclear ribonucleoprotein U           |
| Q61990 | Poly(RC) binding protein 2                          |
| Q9Z2X1 | Heterogeneous nuclear ribonucleoprotein F           |
| P60335 | Poly(rC)-binding protein 1                          |
| O88685 | 26S protease regulatory subunit 6A                  |
| O70251 | Elongation factor 1-beta                            |
| Q3U4U6 | Chaperonin containing Tcp1, subunit 3 (Gamma)       |
| Q8CAY6 | Acetyl-CoA acetyltransferase, cytosolic             |

|        |                                                                 |
|--------|-----------------------------------------------------------------|
| P11983 | T-complex protein 1 subunit alpha                               |
| B7STB7 | Annexin                                                         |
| P09405 | Nucleolin                                                       |
| Q01853 | Transitional endoplasmic reticulum ATPase                       |
| P19324 | 47 kDa heat shock protein                                       |
| Q5U415 | Aldo-keto reductase family 1, member B3 (Aldose reductase)      |
| F8WGL3 | Cofilin 1                                                       |
| Q5M8R8 | 60S acidic ribosomal protein P0                                 |
| Q68FD5 | Clathrin heavy chain 1                                          |
| P62082 | 40S ribosomal protein S7                                        |
| Q571M2 | Heat shock 70 kDa protein 4                                     |
| P80313 | T-complex protein 1 subunit eta                                 |
| Q71LX8 | Heat shock protein 90 alpha                                     |
| P57776 | Elongation factor 1-delta                                       |
| Q3V117 | ATP citrate lyase                                               |
| Q03265 | ATP synthase subunit alpha, mitochondrial                       |
| E9QPA6 | Chaperonin containing Tcp1, subunit 6a (Zeta)                   |
| Q9R0P3 | Esterase 10                                                     |
| Q9D0K2 | Succinyl-CoA:3-ketoacid-coenzyme A transferase 1, mitochondrial |
| Q564E2 | L-lactate dehydrogenase                                         |
| P99024 | Tubulin beta-5 chain                                            |
| Q3TJ71 | UDP-glucose 6-dehydrogenase                                     |
| O08586 | PTEN                                                            |
| Q658W2 | Putative uncharacterized protein DKFZp666O0110                  |
| P80316 | T-complex protein 1 subunit epsilon                             |
| B2RQQ5 | Microtubule-associated protein 1B                               |
| Q9D8N0 | Elongation factor 1-gamma                                       |
| P68134 | Actin, alpha skeletal muscle                                    |
| Q3U7V7 | Profilin                                                        |
| P63017 | Heat shock cognate 71 kDa protein                               |

|        |                                                            |
|--------|------------------------------------------------------------|
| P61164 | Alpha-centractin                                           |
| P58252 | Elongation factor 2                                        |
| Q9CQ65 | S-methyl-5'-thioadenosine phosphorylase                    |
| Q3UMM1 | Tubulin, beta 6                                            |
| Q78PY7 | Staphylococcal nuclease domain-containing protein 1        |
| Q91ZH2 | Proliferating cell nuclear antigen                         |
| Q564F4 | T-complex protein 1 subunit delta                          |
| P68040 | Guanine nucleotide-binding protein subunit beta-2-like 1   |
| P52480 | Pyruvate kinase isozymes M1/M2                             |
| P62908 | 40S ribosomal protein S3                                   |
| P28656 | Nucleosome assembly protein 1-like 1                       |
| O35945 | Aldehyde dehydrogenase, cytosolic 1                        |
| Q91V38 | Endoplasmin                                                |
| P19096 | Fatty acid synthase                                        |
| Q58E64 | Elongation factor 1-alpha                                  |
| Q61276 | A-X actin                                                  |
| P60843 | Eukaryotic initiation factor 4A-I                          |
| P05213 | Tubulin alpha-1B chain                                     |
| Q5FW97 | Enolase 1, alpha non-neuron                                |
| P63038 | 60 kDa heat shock protein, mitochondrial                   |
| Q61937 | Nucleophosmin                                              |
| Q61598 | Rab GDP dissociation inhibitor beta                        |
| Q80Y52 | Heat shock protein 90, alpha (Cytosolic), class A member 1 |
| P68372 | Tubulin beta-4B chain                                      |
| P46471 | 26S protease regulatory subunit 7                          |
| P62702 | 40S ribosomal protein S4, X isoform                        |
| Q5XJY5 | Coatmer subunit delta                                      |
| P62315 | Small nuclear ribonucleoprotein Sm D1                      |
| Q8BG05 | Heterogeneous nuclear ribonucleoprotein A3                 |
| Q9CWF2 | Tubulin beta-2B chain                                      |

|        |                                                     |
|--------|-----------------------------------------------------|
| Q8BGQ7 | Alanine--tRNA ligase, cytoplasmic                   |
| Q8BP47 | Asparagine--tRNA ligase, cytoplasmic                |
| P62830 | 60S ribosomal protein L23                           |
| Q5M9K9 | Ribosomal protein L31                               |
| P16045 | Galectin-1                                          |
| Q8VEM8 | Phosphate carrier protein, mitochondrial            |
| Q8QZT1 | Acetyl-CoA acetyltransferase, mitochondrial         |
| Q9D7S7 | 60S ribosomal protein L22-like 1                    |
| Q02053 | Ubiquitin-like modifier-activating enzyme 1         |
| P16110 | Galectin-3                                          |
| Q8VDD5 | Myosin-9                                            |
| Q3U0U5 | Adenylyl cyclase-associated protein                 |
| Q62167 | DEAD box protein 3, X-chromosomal                   |
| P48962 | ADP/ATP translocase 1                               |
| P27659 | 60S ribosomal protein L3                            |
| P45591 | Cofilin-2                                           |
| Q64674 | Spermidine synthase                                 |
| P47955 | 60S acidic ribosomal protein P1                     |
| Q99JY9 | Actin-related protein 3                             |
| P54775 | 26S protease regulatory subunit 6B                  |
| Q3TXH3 | Lysyl oxidase                                       |
| O08529 | Calpain-2 catalytic subunit                         |
| Q4FK36 | Dextrin                                             |
| Q9CXW4 | 60S ribosomal protein L11                           |
| Q61390 | T-complex protein 1 subunit zeta-2                  |
| P56959 | RNA-binding protein FUS                             |
| Q8BTM8 | Filamin-A                                           |
| Q498M9 | Similar to glyceraldehyde-3-phosphate dehydrogenase |
| P00352 | Retinal dehydrogenase 1                             |
| O88569 | Heterogeneous nuclear ribonucleoproteins A2/B1      |

|             |                                                               |
|-------------|---------------------------------------------------------------|
| P61978      | Heterogeneous nuclear ribonucleoprotein K                     |
| P14866      | Heterogeneous nuclear ribonucleoprotein L                     |
| P00558      | Phosphoglycerate kinase 1                                     |
| P62937      | Peptidyl-prolyl cis-trans isomerase A                         |
| P60174      | Triosephosphate isomerase                                     |
| IPI00458204 | similar to tubulin, $\beta$ 2                                 |
| O00232      | 26S proteasome non-ATPase regulatory subunit 12               |
| P63173      | 60S ribosomal protein L38                                     |
| P08708      | 40S ribosomal protein S17                                     |
| Q07020      | 60S ribosomal protein L18                                     |
| B2RYU2      | Similar to 60S ribosomal protein L12                          |
| B5T1L6      | AHNAK nucleoprotein isoform 1                                 |
| E4ZWE6      | Similar to ubiquitin / ribosomal protein S27a                 |
| Q9Y4K1      | Absent in melanoma 1 protein                                  |
| P48681      | Nestin                                                        |
| Q9HD26      | Golgi-associated PDZ and coiled-coil motif-containing protein |
| P08670      | Vimentin                                                      |
| Q15293      | Reticulocalbin-1                                              |
| Q93009      | Ubiquitin carboxyl-terminal hydrolase 7                       |
| P00338      | L-lactate dehydrogenase A chain                               |
| P04792      | Heat shock protein beta-1                                     |
| Q5TBT2      | Dystonin                                                      |
| P07384      | Calpain-1 catalytic subunit                                   |
| Q15582      | TGFB1                                                         |
| P50402      | Emerin                                                        |
| O14979      | Heterogeneous nuclear ribonucleoprotein D-like                |
| O15027      | Protein transport protein Sec16A                              |
| Q92841      | Probable ATP-dependent RNA helicase DDX17                     |
| P02545      | Prelamin-A/C                                                  |
| P46940      | Ras GTPase-activating-like protein IQGAP1                     |

|        |                                                                                   |
|--------|-----------------------------------------------------------------------------------|
| Q53HU2 | Guanine nucleotide-binding protein subunit beta-2-like 1                          |
| Q01813 | 6-phosphofructokinase type C                                                      |
| P31946 | 14-3-3 protein beta/alpha                                                         |
| Q16555 | Dihydropyrimidinase-related protein 2                                             |
| P27348 | 14-3-3 protein theta                                                              |
| P50454 | Serpin H1                                                                         |
| P62244 | 40S ribosomal protein S15a                                                        |
| Q9Y678 | Coatomer subunit gamma-1                                                          |
| Q9NX63 | Coiled-coil-helix-coiled-coil-helix domain-containing protein 3, mitochondrial    |
| A7BI36 | p180/ribosome receptor                                                            |
| Q16891 | Mitochondrial inner membrane protein                                              |
| P18085 | ADP-ribosylation factor 4                                                         |
| P52272 | Heterogeneous nuclear ribonucleoprotein M                                         |
| B4DW28 | 40S ribosomal protein S20                                                         |
| A7E2F8 | 182 kDa tankyrase-1-binding protein                                               |
| P84098 | 60S ribosomal protein L19                                                         |
| P68366 | Tubulin alpha-4A chain                                                            |
| P30153 | Serine/threonine-protein phosphatase 2A 65 kDa regulatory subunit A alpha isoform |
| P62913 | 60S ribosomal protein L11                                                         |
| P33947 | ER lumen protein retaining receptor 2                                             |
| Q9Y3F4 | Serine-threonine kinase receptor-associated protein                               |
| P63010 | AP-2 complex subunit beta                                                         |
| P04632 | Calpain small subunit 1                                                           |
| P55072 | Transitional endoplasmic reticulum ATPase                                         |
| P52597 | Heterogeneous nuclear ribonucleoprotein F                                         |
| P49411 | Elongation factor Tu, mitochondrial                                               |
| P46781 | 40S ribosomal protein S9                                                          |
| Q5HY50 | Ribosomal protein L10                                                             |
| P62280 | 40S ribosomal protein S11                                                         |
| P42766 | 60S ribosomal protein L35                                                         |



|        |                                                                          |
|--------|--------------------------------------------------------------------------|
| P61247 | 40S ribosomal protein S3a                                                |
| P11940 | Polyadenylate-binding protein 1                                          |
| P04843 | Dolichyl-diphosphooligosaccharide--protein glycosyltransferase subunit 1 |
| Q5QPK0 | Dolichyl-phosphate mannosyltransferase polypeptide 1, catalytic subunit  |
| P46782 | 40S ribosomal protein S5                                                 |
| P31689 | DnaJ homolog subfamily A member 1                                        |
| Q01082 | Spectrin beta chain, brain 1                                             |
| P53621 | Coatomer subunit alpha                                                   |
| P17844 | Probable ATP-dependent RNA helicase DDX5                                 |
| P40429 | 60S ribosomal protein L13a                                               |
| Q9UNF1 | Melanoma-associated antigen D2                                           |
| P60660 | Myosin light polypeptide 6                                               |
| P18621 | 60S ribosomal protein L17                                                |
| Q13200 | 26S proteasome non-ATPase regulatory subunit 2                           |
| P62241 | 40S ribosomal protein S8                                                 |
| P36542 | ATP synthase subunit gamma, mitochondrial                                |
| P61353 | 60S ribosomal protein L27                                                |
| Q9BQA1 | Methylosome protein 50                                                   |
| P62195 | 26S protease regulatory subunit 8                                        |
| Q9NRX2 | 39S ribosomal protein L17, mitochondrial                                 |
| P12268 | Inosine-5'-monophosphate dehydrogenase 2                                 |
| Q9NVI7 | ATPase family AAA domain-containing protein 3A                           |
| O94832 | Unconventional myosin-Id                                                 |
| Q12789 | General transcription factor 3C polypeptide 1                            |
| Q96HS1 | Serine/threonine-protein phosphatase PGAM5, mitochondrial                |
| Q9BRJ7 | Protein syndesmos                                                        |
| Q07021 | Complement component 1 Q subcomponent-binding protein, mitochondrial     |
| Q9UNA1 | Rho GTPase-activating protein 26                                         |
| P58166 | Inhibin beta E chain                                                     |
| Q16671 | Anti-Muellerian hormone type-2 receptor                                  |

|        |                                                                                                                 |
|--------|-----------------------------------------------------------------------------------------------------------------|
| O14654 | Insulin receptor substrate 4                                                                                    |
| P52564 | Dual specificity mitogen-activated protein kinase kinase 6                                                      |
| Q16513 | Serine/threonine-protein kinase N2                                                                              |
| P16234 | Platelet-derived growth factor receptor alpha                                                                   |
| Q9BXM7 | Serine/threonine-protein kinase PINK1, mitochondrial                                                            |
| Q92791 | Synaptonemal complex protein SC65                                                                               |
| A8K6H6 | cDNA FLJ76875, highly similar to Homo sapiens protein tyrosine phosphatase, non-receptor type 14 (PTPN14), mRNA |
| Q15678 | Tyrosine-protein phosphatase non-receptor type 14                                                               |
| Q8TEX0 | Protein DBF4 homolog B                                                                                          |
| O60606 | Ras GTPase-activating protein-binding protein 2                                                                 |
| Q96TC6 | Cerebral protein-13                                                                                             |
| P46109 | Crk-like protein                                                                                                |
| Q14795 | Caspase-8                                                                                                       |
| Q6PID4 | Protein-tyrosine kinase 2-beta                                                                                  |
| P56705 | Protein Wnt-4                                                                                                   |
| B3DIF4 | Zgc:55701 protein                                                                                               |
| Q8TDT3 | Probable G-protein coupled receptor 113                                                                         |
| O15316 | GDNF family receptor alpha-2                                                                                    |
| Q8WWW1 | Smoothelin                                                                                                      |
| Q3MI93 | RNA polymerase II transcription factor SIII subunit A3-like-1                                                   |
| Q05397 | Focal Adhesion Kinase (FAK)                                                                                     |
| A2A5Z6 | E3 ubiquitin-protein ligase SMURF2                                                                              |
| P35568 | Insulin receptor substrate 1                                                                                    |
| Q9Y4H2 | Insulin receptor substrate 2                                                                                    |
| Q6PIZ9 | T-cell receptor-associated transmembrane adapter 1 (TRAT 1)                                                     |
| P61247 | 40S ribosomal protein S3a                                                                                       |
| O43460 | PTENP1                                                                                                          |
| Q8TDY2 | RB1-inducible coiled-coil protein 1                                                                             |
| Q92835 | SHIP-1                                                                                                          |
| O43426 | Synaptojanin-1                                                                                                  |

|        |                                                                            |
|--------|----------------------------------------------------------------------------|
| O15056 | Synaptojanin-2                                                             |
| Q96D37 | VAV1 protein                                                               |
| P01116 | KRAS                                                                       |
| P01111 | NRAS                                                                       |
| P01112 | GTPase HRas                                                                |
| Q07889 | Son of sevenless homolog 1                                                 |
| P21860 | Receptor tyrosine-protein kinase erbB-3                                    |
| P18146 | Early growth response protein 1                                            |
| Q99418 | Cytohesin-2                                                                |
| P29353 | SHC-transforming protein 1                                                 |
| Q13480 | GRB2-associated-binding protein 1                                          |
| P11274 | Breakpoint cluster region protein                                          |
| P11912 | CD79A                                                                      |
| P40259 | CD79B                                                                      |
| P62993 | Growth factor receptor-bound protein 2                                     |
| Q8WZA2 | RAPGEF4                                                                    |
| Q96PE3 | Type I inositol-3,4-bisphosphate 4-phosphatase                             |
| O15327 | Type II inositol-3,4-bisphosphate 4-phosphatase                            |
| P32019 | Type II inositol-1,4,5-trisphosphate 5-phosphatase                         |
| Q8WUK0 | Protein-tyrosine phosphatase mitochondrial 1                               |
| P05556 | Integrin beta-1                                                            |
| Q59F77 | Phospholipase C, beta 2 variant                                            |
| O14735 | CDP-diacylglycerol--inositol 3-phosphatidyltransferase                     |
| Q8TCU6 | Phosphatidylinositol 3,4,5-trisphosphate-dependent Rac exchanger 1 protein |
| Q4LE43 | PLCG1 variant protein                                                      |
| P42336 | PIK3CA                                                                     |
| O00443 | PIK3C2A                                                                    |
| Q68DL0 | PIK3CB                                                                     |
| O00750 | PIK3C2B                                                                    |
| O00329 | PIK3CD                                                                     |

|        |                                                                     |
|--------|---------------------------------------------------------------------|
| P48736 | PIK3CG                                                              |
| O75747 | PIK3C2G                                                             |
| Q8NEB9 | PIK3C3                                                              |
| O00334 | Phosphatidylinositol 3-kinase delta catalytic subunit               |
| P27986 | PIK3R1                                                              |
| O00459 | PIK3R2                                                              |
| Q92569 | PIK3R3                                                              |
| Q8WYR1 | PIK3R5                                                              |
| Q9NRR6 | 72 kDa inositol polyphosphate 5-phosphatase                         |
| Q9NQ66 | 1-phosphatidylinositol-4,5-bisphosphate phosphodiesterase beta-1    |
| Q01970 | 1-phosphatidylinositol-4,5-bisphosphate phosphodiesterase beta-3    |
| Q15147 | 1-phosphatidylinositol-4,5-bisphosphate phosphodiesterase beta-4    |
| Q8N3E9 | 1-phosphatidylinositol-4,5-bisphosphate phosphodiesterase delta-3   |
| Q9BRC7 | 1-phosphatidylinositol-4,5-bisphosphate phosphodiesterase delta-4   |
| Q9P212 | 1-phosphatidylinositol-4,5-bisphosphate phosphodiesterase epsilon-1 |
| P16885 | 1-phosphatidylinositol-4,5-bisphosphate phosphodiesterase gamma-2   |
| Q86YW0 | 1-phosphatidylinositol-4,5-bisphosphate phosphodiesterase zeta-1    |
| Q68CY7 | Putative uncharacterized protein DKFZp686P05226                     |
| Q6A1A2 | Putative 3-phosphoinositide-dependent protein kinase 2              |
| B3KR14 | Phospholipase C, delta 1                                            |
| P42356 | Phosphatidylinositol 4-kinase alpha                                 |
| Q9UBF8 | Phosphatidylinositol 4-kinase beta                                  |
| Q99755 | Phosphatidylinositol-4-phosphate 5-kinase type-1 alpha              |
| P48426 | Phosphatidylinositol-5-phosphate 4-kinase type-2 alpha              |
| O14986 | Phosphatidylinositol-4-phosphate 5-kinase type-1 beta               |
| P78356 | Phosphatidylinositol-5-phosphate 4-kinase type-2 beta               |
| O60331 | Phosphatidylinositol-4-phosphate 5-kinase type-1 gamma              |
| Q8TBX8 | Phosphatidylinositol-5-phosphate 4-kinase type-2 gamma              |
| Q01968 | Inositol polyphosphate 5-phosphatase OCRL-1                         |
| Q9Y2I7 | 1-phosphatidylinositol-3-phosphate 5-kinase                         |

|                 |                                                                    |
|-----------------|--------------------------------------------------------------------|
| O15530          | 3-phosphoinositide-dependent protein kinase 1                      |
| P08069          | Insulin-like growth factor 1 receptor                              |
| P42345          | MTOR                                                               |
| Q9UPR6          | Zinc finger RNA-binding protein 2                                  |
| Q14240          | Eukaryotic initiation factor 4A-II                                 |
| refseq:NP_0578: | Tat [Human immunodeficiency virus 1]                               |
| Q9BVJ6          | U3 small nucleolar RNA-associated protein 14 homolog A             |
| P05060          | Secretogranin-1                                                    |
| P03950          | Angiogenin                                                         |
| P69905          | Hemoglobin subunit alpha/ Alpha 2 globin variant (HBA1)            |
| Q7L5N1          | COP9 signalosome complex subunit 6                                 |
| P42229          | Signal transducer and activator of transcription 5A (STAT5A)       |
| Q53XB4          | Full-length cDNA clone CS0DF032YM23 of Fetal brain of Homo sapiens |
| P46527          | p27Kip1                                                            |
| Q9P0U4          | Methyl-CpG-binding domain protein 1                                |
| O00423          | Echinoderm microtubule-associated protein-like 1                   |
| Q9Y6B2          | EP300-interacting inhibitor of differentiation 1                   |
| Q6WCQ1          | Myosin phosphatase Rho-interacting protein                         |
| Q9NRD5          | PRKCA-binding protein                                              |
| P29350          | Tyrosine-protein phosphatase non-receptor type 6                   |
| P23443          | Ribosomal protein S6 kinase beta-1                                 |
| Q9UBS0          | Ribosomal protein S6 kinase beta-2                                 |
| Q8N488          | RING1 and YY1-binding protein                                      |
| P98170          | E3 ubiquitin-protein ligase XIAP                                   |
| Q640N1          | Adipocyte enhancer-binding protein 1                               |

**SUPPLEMENTARY TABLE S2**  
**GO CLASSIFICATION FOR MAPPED PROTEINS**

| Entry  | Entry name  | Gene names        | Length | Gene ontology (GO)                                                                                                                                                                                                                                                                                                                                                                                                                                                                                                                                                                                                                                                                                                                                                                                                                                                                                                                                                                                                                                                                                                                                                                                                                                                                                                                                                                                                                                                                                                                                                                                                                                                                                                                                                                                                                                                                                                                                                                                                                                                                                                                                                                                                                                                                                                                                                                                                                                                                                                                                                                                                                                                                                                                                                                                                                                                                                                                                                                                                                     |
|--------|-------------|-------------------|--------|----------------------------------------------------------------------------------------------------------------------------------------------------------------------------------------------------------------------------------------------------------------------------------------------------------------------------------------------------------------------------------------------------------------------------------------------------------------------------------------------------------------------------------------------------------------------------------------------------------------------------------------------------------------------------------------------------------------------------------------------------------------------------------------------------------------------------------------------------------------------------------------------------------------------------------------------------------------------------------------------------------------------------------------------------------------------------------------------------------------------------------------------------------------------------------------------------------------------------------------------------------------------------------------------------------------------------------------------------------------------------------------------------------------------------------------------------------------------------------------------------------------------------------------------------------------------------------------------------------------------------------------------------------------------------------------------------------------------------------------------------------------------------------------------------------------------------------------------------------------------------------------------------------------------------------------------------------------------------------------------------------------------------------------------------------------------------------------------------------------------------------------------------------------------------------------------------------------------------------------------------------------------------------------------------------------------------------------------------------------------------------------------------------------------------------------------------------------------------------------------------------------------------------------------------------------------------------------------------------------------------------------------------------------------------------------------------------------------------------------------------------------------------------------------------------------------------------------------------------------------------------------------------------------------------------------------------------------------------------------------------------------------------------------|
| P34968 | 5HT2C_MOUSE | Htr2c 5ht1c Htr1c | 459    | 1-(4-iodo-2,5-dimethoxyphenyl)propan-2-amine binding; ERK1 and ERK2 cascade; cGMP biosynthetic process; cytoplasm; drug binding; integral to membrane; nucleus; phosphatidylinositol biosynthetic process; phosphatidylinositol phospholipase C activity; plasma membrane; release of sequestered calcium ion into cytosol; response to drug; serotonin binding; serotonin receptor activity                                                                                                                                                                                                                                                                                                                                                                                                                                                                                                                                                                                                                                                                                                                                                                                                                                                                                                                                                                                                                                                                                                                                                                                                                                                                                                                                                                                                                                                                                                                                                                                                                                                                                                                                                                                                                                                                                                                                                                                                                                                                                                                                                                                                                                                                                                                                                                                                                                                                                                                                                                                                                                           |
| P10275 | ANDR_HUMAN  | AR DHTR NR3C4     | 919    | activation of prostate induction by androgen receptor signaling pathway; androgen binding; androgen receptor activity; axon; cell death; cell growth; cell proliferation; cell-cell signaling; chromatin binding; cytoplasm; dendrite; epithelial cell differentiation involved in prostate gland development; in utero embryonic development; lateral sprouting involved in mammary gland duct morphogenesis; male genitalia morphogenesis; male gonad development; male somatic sex determination; mammary gland alveolus development; morphogenesis of an epithelial fold; negative regulation of apoptotic process; negative regulation of epithelial cell proliferation; negative regulation of integrin biosynthetic process; nuclear chromatin; nucleoplasm; organ formation; positive regulation of MAPK cascade; positive regulation of NF-kappaB transcription factor activity; positive regulation of cell proliferation; positive regulation of insulin-like growth factor receptor signaling pathway; positive regulation of integrin biosynthetic process; positive regulation of intracellular estrogen receptor signaling pathway; positive regulation of phosphorylation; positive regulation of transcription from RNA polymerase II promoter; positive regulation of transcription from RNA polymerase III promoter; prostate gland development; prostate gland epithelium morphogenesis; prostate gland growth; regulation of catalytic activity; regulation of developmental growth; regulation of establishment of protein localization in plasma membrane; regulation of prostatic bud formation; response to insulin stimulus; sequence-specific DNA binding; sex differentiation; tertiary branching involved in mammary gland duct morphogenesis; transcription initiation from RNA polymerase II promoter; transcription regulatory region DNA binding; transport; zinc ion binding                                                                                                                                                                                                                                                                                                                                                                                                                                                                                                                                                                                                                                                                                                                                                                                                                                                                                                                                                                                                                                                                                                                         |
| Q9UJX5 | APC4_HUMAN  | ANAPC4 APC4       | 808    | G2/M transition of mitotic cell cycle; anaphase-promoting complex; anaphase-promoting complex-dependent proteasomal ubiquitin-dependent protein catabolic process; cell division; cytosol; mitotic anaphase; mitotic cell cycle spindle assembly checkpoint; negative regulation of ubiquitin-protein ligase activity involved in mitotic cell cycle; nucleoplasm; positive regulation of ubiquitin-protein ligase activity involved in mitotic cell cycle; protein K11-linked ubiquitination; ubiquitin-protein ligase activity                                                                                                                                                                                                                                                                                                                                                                                                                                                                                                                                                                                                                                                                                                                                                                                                                                                                                                                                                                                                                                                                                                                                                                                                                                                                                                                                                                                                                                                                                                                                                                                                                                                                                                                                                                                                                                                                                                                                                                                                                                                                                                                                                                                                                                                                                                                                                                                                                                                                                                       |
| Q9UJX4 | APC5_HUMAN  | ANAPC5 APC5       | 755    | G2/M transition of mitotic cell cycle; anaphase-promoting complex; anaphase-promoting complex-dependent proteasomal ubiquitin-dependent protein catabolic process; cell division; cytosol; mitotic anaphase; mitotic cell cycle spindle assembly checkpoint; negative regulation of ubiquitin-protein ligase activity involved in mitotic cell cycle; nucleoplasm; positive regulation of ubiquitin-protein ligase activity involved in mitotic cell cycle; protein K11-linked ubiquitination; ubiquitin-protein ligase activity                                                                                                                                                                                                                                                                                                                                                                                                                                                                                                                                                                                                                                                                                                                                                                                                                                                                                                                                                                                                                                                                                                                                                                                                                                                                                                                                                                                                                                                                                                                                                                                                                                                                                                                                                                                                                                                                                                                                                                                                                                                                                                                                                                                                                                                                                                                                                                                                                                                                                                       |
| P49407 | ARRB1_HUMAN | ARRB1 ARR1        | 418    | G-protein coupled receptor internalization; GTPase activator activity; Golgi membrane; Notch signaling pathway; cellular membrane organization; chromatin; coated pit; cytoplasmic vesicle membrane; cytosol; enzyme inhibitor activity; histone H4 acetylation; lysosomal membrane; membrane fraction; negative regulation of NF-kappaB transcription factor activity; negative regulation of interleukin-6 production; negative regulation of interleukin-8 production; negative regulation of protein ubiquitination; nucleus; plasma membrane; platelet activation; positive regulation of ERK1 and ERK2 cascade; positive regulation of Rho protein signal transduction; positive regulation of histone acetylation; positive regulation of transcription from RNA polymerase II promoter; post-Golgi vesicle-mediated transport; proteasomal ubiquitin-dependent protein catabolic process; protein transport; protein ubiquitination; pseudopodium; soluble fraction; stress fiber assembly; transcription from RNA polymerase II promoter; transcription regulatory region DNA binding                                                                                                                                                                                                                                                                                                                                                                                                                                                                                                                                                                                                                                                                                                                                                                                                                                                                                                                                                                                                                                                                                                                                                                                                                                                                                                                                                                                                                                                                                                                                                                                                                                                                                                                                                                                                                                                                                                                                         |
| P35226 | BMI1_HUMAN  | BMI1 PCGF4 RNF51  | 326    | PRC1 complex; brain development; chromatin binding; cytoplasm; embryonic skeletal system morphogenesis; hemopoiesis; histone acetylation; histone ubiquitination; humoral immune response; in utero embryonic development; negative regulation of apoptotic process; negative regulation of transcription from RNA polymerase II promoter; nuclear body; nucleolus; positive regulation of B cell proliferation; positive regulation of fibroblast proliferation; positive regulation of immature T cell proliferation in thymus; positive regulation of ubiquitin-protein ligase activity; rostrocaudal neural tube patterning; segment specification; sequence-specific DNA binding; somatic stem cell division; transcription, DNA-dependent; ubiquitin ligase complex; ubiquitin-protein ligase activity; zinc ion binding                                                                                                                                                                                                                                                                                                                                                                                                                                                                                                                                                                                                                                                                                                                                                                                                                                                                                                                                                                                                                                                                                                                                                                                                                                                                                                                                                                                                                                                                                                                                                                                                                                                                                                                                                                                                                                                                                                                                                                                                                                                                                                                                                                                                         |
| Q03135 | CAVI_HUMAN  | CAVI CAV          | 178    | Golgi membrane; MAPK cascade; T cell costimulation; acrosomal membrane; apical plasma membrane; basal plasma membrane; basolateral plasma membrane; blood coagulation; calcium ion transport; caveola; caveola assembly; caveolin-mediated endocytosis; cell cortex; cell surface; cellular response to hyperoxia; cellular response to starvation; cholesterol binding; cholesterol efflux; cholesterol homeostasis; cholesterol transport; cytosol; cytosolic calcium ion homeostasis; endocytic vesicle membrane; endoplasmic reticulum; endosome; flagellum; focal adhesion; inactivation of MAPK activity; induction of apoptosis by extracellular signals; integral to membrane of membrane fraction; integral to plasma membrane; interspecies interaction between organisms; lactation; leukocyte migration; lipid particle; lipid storage; maintenance of protein location in cell; mammary gland involution; membrane depolarization; microtubule polymerization; mitochondrion; negative regulation of BMP signaling pathway; negative regulation of JAK-STAT cascade; negative regulation of canonical Wnt receptor signaling pathway; negative regulation of cytokine-mediated signaling pathway; negative regulation of endothelial cell proliferation; negative regulation of epithelial cell differentiation; negative regulation of nitric oxide biosynthetic process; negative regulation of peptidyl-serine phosphorylation; negative regulation of protein binding; negative regulation of transcription from RNA polymerase II promoter; negative regulation of tyrosine phosphorylation of Stat5 protein; nitric oxide homeostasis; nitric oxide metabolic process; peptidase activator activity; perinuclear region of cytoplasm; positive regulation of anti-apoptosis; positive regulation of calcium ion transport into cytosol; positive regulation of canonical Wnt receptor signaling pathway; positive regulation of endocytosis; positive regulation of extrinsic apoptotic signaling pathway; positive regulation of intrinsic apoptotic signaling pathway; positive regulation of metalloenzyme activity; positive regulation of microtubule polymerization; positive regulation of peptidyl-serine phosphorylation; positive regulation of vasoconstriction; protein complex; protein homo-oligomerization; receptor internalization involved in canonical Wnt receptor signaling pathway; regulation of blood coagulation; regulation of fatty acid metabolic process; regulation of nitric-oxide synthase activity; regulation of smooth muscle contraction; response to calcium ion; response to drug; response to estrogen stimulus; response to gamma radiation; response to glucocorticoid stimulus; response to hypoxia; response to mechanical stimulus; response to nutrient; response to progesterone stimulus; skeletal muscle tissue development; soluble fraction; structural molecule activity; triglyceride metabolic process; vasculogenesis; vasoconstriction; vesicle organization |
| P49452 | CENPC_MOUSE | Cenpc1 Cenpc      | 906    | DNA binding; cell division; centromeric heterochromatin; chromosome segregation; condensed chromosome kinetochore; condensed nuclear chromosome, centromeric region; kinetochore; kinetochore assembly; mitosis; mitotic cell cycle                                                                                                                                                                                                                                                                                                                                                                                                                                                                                                                                                                                                                                                                                                                                                                                                                                                                                                                                                                                                                                                                                                                                                                                                                                                                                                                                                                                                                                                                                                                                                                                                                                                                                                                                                                                                                                                                                                                                                                                                                                                                                                                                                                                                                                                                                                                                                                                                                                                                                                                                                                                                                                                                                                                                                                                                    |
| Q12959 | DLG1_HUMAN  | DLG1              | 904    | MPP7-DLG1-LIN7 complex; actin filament organization; axon guidance; basolateral plasma membrane; cell-cell adhesion; cortical actin cytoskeleton organization; cytosol; endoplasmic reticulum membrane; endothelial cell proliferation; establishment or maintenance of cell polarity; guanylate kinase activity; immunological synapse; interspecies interaction between organisms; mitotic cell cycle G1/S transition checkpoint; negative regulation of mitotic cell cycle; nucleus; phosphoprotein phosphatase activity; postsynaptic density; postsynaptic membrane; potassium channel regulator activity; protein localization in plasma membrane; sarcolemma; synaptic transmission; tight junction; tight junction assembly                                                                                                                                                                                                                                                                                                                                                                                                                                                                                                                                                                                                                                                                                                                                                                                                                                                                                                                                                                                                                                                                                                                                                                                                                                                                                                                                                                                                                                                                                                                                                                                                                                                                                                                                                                                                                                                                                                                                                                                                                                                                                                                                                                                                                                                                                                    |
| P42685 | FRK_HUMAN   | FRK PTK5 RAK      | 505    | ATP binding; cell differentiation; cytoplasm; negative regulation of cell proliferation; non-membrane spanning protein tyrosine kinase activity; nucleus; plasma membrane                                                                                                                                                                                                                                                                                                                                                                                                                                                                                                                                                                                                                                                                                                                                                                                                                                                                                                                                                                                                                                                                                                                                                                                                                                                                                                                                                                                                                                                                                                                                                                                                                                                                                                                                                                                                                                                                                                                                                                                                                                                                                                                                                                                                                                                                                                                                                                                                                                                                                                                                                                                                                                                                                                                                                                                                                                                              |

|        |             |                               |                                                                                                                                                                                                                                                                                                                                                                                                                                                                                                                                                                                                                                                                                                                                                                                                                                                                                                                                                                                                                                                                                                                                                                                                                                                                                                                                                                                                                                                                                                                                                                                                                                                                                                                                                                                                                                                                                                                                                                                                                                                                                                                                                                                                                                                                                                                                                                                                                                                                                                                                                                                                                                                                                                                                                                                                                                                                                                                                                                                                                                                                                                                                                                                                                      |
|--------|-------------|-------------------------------|----------------------------------------------------------------------------------------------------------------------------------------------------------------------------------------------------------------------------------------------------------------------------------------------------------------------------------------------------------------------------------------------------------------------------------------------------------------------------------------------------------------------------------------------------------------------------------------------------------------------------------------------------------------------------------------------------------------------------------------------------------------------------------------------------------------------------------------------------------------------------------------------------------------------------------------------------------------------------------------------------------------------------------------------------------------------------------------------------------------------------------------------------------------------------------------------------------------------------------------------------------------------------------------------------------------------------------------------------------------------------------------------------------------------------------------------------------------------------------------------------------------------------------------------------------------------------------------------------------------------------------------------------------------------------------------------------------------------------------------------------------------------------------------------------------------------------------------------------------------------------------------------------------------------------------------------------------------------------------------------------------------------------------------------------------------------------------------------------------------------------------------------------------------------------------------------------------------------------------------------------------------------------------------------------------------------------------------------------------------------------------------------------------------------------------------------------------------------------------------------------------------------------------------------------------------------------------------------------------------------------------------------------------------------------------------------------------------------------------------------------------------------------------------------------------------------------------------------------------------------------------------------------------------------------------------------------------------------------------------------------------------------------------------------------------------------------------------------------------------------------------------------------------------------------------------------------------------------|
| Q92831 | KAT2B_HUMAN | KAT2B PCAF                    | 832 A band; Ada2/Gcn5/Ada3 transcription activator complex; I band; N-terminal peptidyl-lysine acetylation; Notch signaling pathway; PCAF complex; actomyosin; cell cycle arrest; cellular response to insulin stimulus; chromatin remodeling; chromatin remodeling complex; cyclin-dependent protein kinase inhibitor activity; histone H3 acetylation; histone acetyltransferase activity; interspecies interaction between organisms; kinetochore; lysine N-acetyltransferase activity; negative regulation of cell proliferation; negative regulation of cyclin-dependent protein kinase activity; positive regulation of transcription from RNA polymerase II promoter; transcription coactivator activity; transcription initiation from RNA polymerase I promoter; transcription initiation from RNA polymerase II promoter                                                                                                                                                                                                                                                                                                                                                                                                                                                                                                                                                                                                                                                                                                                                                                                                                                                                                                                                                                                                                                                                                                                                                                                                                                                                                                                                                                                                                                                                                                                                                                                                                                                                                                                                                                                                                                                                                                                                                                                                                                                                                                                                                                                                                                                                                                                                                                                   |
| Q96QZ7 | MAGI1_HUMAN | MAGI1 AIP3 BAIAP1 BAP1 TNRC19 | 1491 ATP binding; cell adhesion; cell projection; cell surface receptor signaling pathway; cell-cell junction; cytoplasm; plasma membrane; protein complex assembly; tight junction                                                                                                                                                                                                                                                                                                                                                                                                                                                                                                                                                                                                                                                                                                                                                                                                                                                                                                                                                                                                                                                                                                                                                                                                                                                                                                                                                                                                                                                                                                                                                                                                                                                                                                                                                                                                                                                                                                                                                                                                                                                                                                                                                                                                                                                                                                                                                                                                                                                                                                                                                                                                                                                                                                                                                                                                                                                                                                                                                                                                                                  |
| O88382 | MAGI2_RAT   | Magi2 Acvrinp1 Aip1 Sscam     | 1277 SMAD protein signal transduction; glomerular filtration; glomerular visceral epithelial cell development; mitotic cell cycle arrest; negative regulation of activin receptor signaling pathway; negative regulation of cell migration; negative regulation of cell proliferation; negative regulation of protein kinase B signaling cascade; nucleus; perinuclear region of cytoplasm; positive regulation of phosphoprotein phosphatase activity; positive regulation of receptor internalization; postsynaptic density; protein complex; protein heterooligomerization; receptor clustering; signal transducer activity; slit diaphragm; synaptosome; tight junction                                                                                                                                                                                                                                                                                                                                                                                                                                                                                                                                                                                                                                                                                                                                                                                                                                                                                                                                                                                                                                                                                                                                                                                                                                                                                                                                                                                                                                                                                                                                                                                                                                                                                                                                                                                                                                                                                                                                                                                                                                                                                                                                                                                                                                                                                                                                                                                                                                                                                                                                          |
| Q5TCQ9 | MAGI3_HUMAN | MAGI3 KIAA1634                | 1506 ATP binding; apoptotic process; guanylate kinase activity; interspecies interaction between organisms; intracellular; intracellular signal transduction; membrane; nucleus; tight junction                                                                                                                                                                                                                                                                                                                                                                                                                                                                                                                                                                                                                                                                                                                                                                                                                                                                                                                                                                                                                                                                                                                                                                                                                                                                                                                                                                                                                                                                                                                                                                                                                                                                                                                                                                                                                                                                                                                                                                                                                                                                                                                                                                                                                                                                                                                                                                                                                                                                                                                                                                                                                                                                                                                                                                                                                                                                                                                                                                                                                      |
| Q9R1L5 | MAST1_MOUSE | Mast1 Kiaa0973 Sast           | 1570 ATP binding; cytoplasm; cytoskeleton; cytoskeleton organization; intracellular protein kinase cascade; magnesium ion binding; membrane; plasma membrane; protein serine/threonine kinase activity                                                                                                                                                                                                                                                                                                                                                                                                                                                                                                                                                                                                                                                                                                                                                                                                                                                                                                                                                                                                                                                                                                                                                                                                                                                                                                                                                                                                                                                                                                                                                                                                                                                                                                                                                                                                                                                                                                                                                                                                                                                                                                                                                                                                                                                                                                                                                                                                                                                                                                                                                                                                                                                                                                                                                                                                                                                                                                                                                                                                               |
| Q60592 | MAST2_MOUSE | Mast2 Mast205                 | 1734 ATP binding; cell junction; cytoplasm; magnesium ion binding; membrane; microtubule cytoskeleton; protein serine/threonine kinase activity; regulation of interleukin-12 biosynthetic process; spermatid differentiation                                                                                                                                                                                                                                                                                                                                                                                                                                                                                                                                                                                                                                                                                                                                                                                                                                                                                                                                                                                                                                                                                                                                                                                                                                                                                                                                                                                                                                                                                                                                                                                                                                                                                                                                                                                                                                                                                                                                                                                                                                                                                                                                                                                                                                                                                                                                                                                                                                                                                                                                                                                                                                                                                                                                                                                                                                                                                                                                                                                        |
| O60307 | MAST3_HUMAN | MAST3 KIAA0561                | 1309 ATP binding; magnesium ion binding; protein serine/threonine kinase activity                                                                                                                                                                                                                                                                                                                                                                                                                                                                                                                                                                                                                                                                                                                                                                                                                                                                                                                                                                                                                                                                                                                                                                                                                                                                                                                                                                                                                                                                                                                                                                                                                                                                                                                                                                                                                                                                                                                                                                                                                                                                                                                                                                                                                                                                                                                                                                                                                                                                                                                                                                                                                                                                                                                                                                                                                                                                                                                                                                                                                                                                                                                                    |
| P08473 | NEP_HUMAN   | MME EPN                       | 750 axon; beta-amyloid metabolic process; brush border; cellular response to UV-A; cellular response to UV-B; cellular response to cytokine stimulus; creatinine metabolic process; dendrite; integral to plasma membrane; kidney development; membrane fraction; metalloendopeptidase activity; neuron projection terminus; peptide binding; peptide metabolic process; proteolysis; replicative senescence; sensory perception of pain; synaptic vesicle; zinc ion binding                                                                                                                                                                                                                                                                                                                                                                                                                                                                                                                                                                                                                                                                                                                                                                                                                                                                                                                                                                                                                                                                                                                                                                                                                                                                                                                                                                                                                                                                                                                                                                                                                                                                                                                                                                                                                                                                                                                                                                                                                                                                                                                                                                                                                                                                                                                                                                                                                                                                                                                                                                                                                                                                                                                                         |
| O14745 | NHRF1_HUMAN | SLC9A3R1 NHERF NHERF1         | 358 Wnt receptor signaling pathway; actin cytoskeleton; actin cytoskeleton organization; adenylate cyclase-activating dopamine receptor signaling pathway; apical plasma membrane; apoptotic process; bile acid secretion; brush border membrane; cellular phosphate ion homeostasis; cellular protein localization; centrosome; chloride channel regulator activity; endomembrane system; filopodium; glutathione transport; intracellular membrane-bounded organelle; microvillus assembly; microvillus membrane; negative regulation of ERK1 and ERK2 cascade; negative regulation of cell migration; negative regulation of cell proliferation; negative regulation of phosphatidylinositol 3-kinase cascade; negative regulation of platelet-derived growth factor receptor signaling pathway; negative regulation of protein kinase B signaling cascade; negative regulation of sodium ion transport; negative regulation of sodium:hydrogen antiporter activity; phospholipase C-activating dopamine receptor signaling pathway; protein complex assembly; regulation of excretion; regulation of protein kinase activity; regulation of sodium:hydrogen antiporter activity; renal phosphate ion absorption; renal sodium ion transport; ruffle                                                                                                                                                                                                                                                                                                                                                                                                                                                                                                                                                                                                                                                                                                                                                                                                                                                                                                                                                                                                                                                                                                                                                                                                                                                                                                                                                                                                                                                                                                                                                                                                                                                                                                                                                                                                                                                                                                                                                              |
| Q15599 | NHRF2_HUMAN | SLC9A3R2 NHERF2               | 337 apical plasma membrane; channel regulator activity; cytoplasm; endomembrane system; inner ear development; negative regulation of phosphatidylinositol 3-kinase cascade; nucleus; plasma membrane; positive regulation of membrane potential; protein complex assembly                                                                                                                                                                                                                                                                                                                                                                                                                                                                                                                                                                                                                                                                                                                                                                                                                                                                                                                                                                                                                                                                                                                                                                                                                                                                                                                                                                                                                                                                                                                                                                                                                                                                                                                                                                                                                                                                                                                                                                                                                                                                                                                                                                                                                                                                                                                                                                                                                                                                                                                                                                                                                                                                                                                                                                                                                                                                                                                                           |
| P04637 | P53_HUMAN   | TP53 P53                      | 393 ATP binding; B cell lineage commitment; DNA damage response, signal transduction by p53 class mediator resulting in cell cycle arrest; DNA damage response, signal transduction by p53 class mediator resulting in induction of apoptosis; DNA damage response, signal transduction by p53 class mediator resulting in transcription of p21 class mediator; DNA strand annealing activity; ER overload response; PML body; RNA polymerase II core promoter proximal region sequence-specific DNA binding transcription factor activity involved in positive regulation of transcription; Ras protein signal transduction; T cell differentiation in thymus; T cell lineage commitment; T cell proliferation involved in immune response; apoptotic process; base-excision repair; blood coagulation; cell cycle arrest; cell differentiation; cell proliferation; cellular protein localization; cellular response to UV; cellular response to drug; cellular response to glucose starvation; cellular response to hypoxia; cellular response to ionizing radiation; central nervous system development; chromatin assembly complex; chromatin binding; chromosome organization; copper ion binding; cytoplasm; cytosol; damaged DNA binding; determination of adult lifespan; double-strand break repair; endoplasmic reticulum; gastrulation; histone deacetylase regulator activity; in utero embryonic development; insoluble fraction; interspecies interaction between organisms; mitochondrion; mitotic cell cycle arrest; multicellular organism growth; negative regulation of DNA replication; negative regulation of apoptotic process; negative regulation of cell growth; negative regulation of fibroblast proliferation; negative regulation of helicase activity; negative regulation of neuroblast proliferation; negative regulation of transcription from RNA polymerase II promoter; negative regulation of transforming growth factor beta receptor signaling pathway; nuclear chromatin; nuclear matrix; nucleolus; nucleotide-excision repair; nucleus; oxidative stress-induced premature senescence; positive regulation of cell aging; positive regulation of histone deacetylation; positive regulation of intrinsic apoptotic signaling pathway; positive regulation of neuron apoptotic process; positive regulation of peptidyl-tyrosine phosphorylation; positive regulation of protein oligomerization; positive regulation of reactive oxygen species metabolic process; positive regulation of release of cytochrome c from mitochondria; positive regulation of thymocyte apoptotic process; positive regulation of transcription from RNA polymerase II promoter; protein import into nucleus, translocation; protein localization; protein tetramerization; rRNA transcription; regulation of mitochondrial membrane permeability; release of cytochrome c from mitochondria; replication fork; replicative senescence; response to X-ray; response to antibiotic; response to gamma radiation; sequence-specific DNA binding transcription factor activity; somitogenesis; transcription regulatory region DNA binding; transcription repressor activity; zinc ion binding |
| O00254 | PAR3_HUMAN  | F2RL2 PAR3                    | 374 apical plasma membrane; extracellular region; integral to plasma membrane; phosphatidylinositol phospholipase C activity; platelet activation; thrombin receptor activity                                                                                                                                                                                                                                                                                                                                                                                                                                                                                                                                                                                                                                                                                                                                                                                                                                                                                                                                                                                                                                                                                                                                                                                                                                                                                                                                                                                                                                                                                                                                                                                                                                                                                                                                                                                                                                                                                                                                                                                                                                                                                                                                                                                                                                                                                                                                                                                                                                                                                                                                                                                                                                                                                                                                                                                                                                                                                                                                                                                                                                        |
| P09619 | PGFRB_HUMAN | PDGFRB PDGFR PDGFR1           | 1106 ATP binding; adrenal gland development; aorta morphogenesis; apical plasma membrane; cardiac myofibril assembly; cell migration involved in coronary angiogenesis; cell migration involved in vasculogenesis; cytoplasm; cytoplasmic membrane-bounded vesicle; in utero embryonic development; integral to plasma membrane; intrinsic to plasma membrane; lysosomal lumen; metanephric glomerular capillary formation; metanephric glomerular mesangial cell proliferation involved in metanephros development; nitrogen compound metabolic process; nucleus; peptidyl-tyrosine phosphorylation; phosphatidylinositol metabolic process; phosphatidylinositol-mediated signaling; platelet activating factor receptor activity; platelet-derived growth factor beta-receptor activity; positive regulation of DNA biosynthetic process; positive regulation of ERK1 and ERK2 cascade; positive regulation of MAP kinase activity; positive regulation of calcium ion import; positive regulation of cell proliferation by VEGF-activated platelet derived growth factor receptor signaling pathway; positive regulation of chemotaxis; positive regulation of metanephric mesenchymal cell migration by platelet-derived growth factor receptor-beta signaling pathway; positive regulation of mitosis; positive regulation of phosphatidylinositol 3-kinase activity; positive regulation of phosphatidylinositol 3-kinase cascade; positive regulation of phospholipase C activity; positive regulation of phosphoprotein phosphatase activity; positive regulation of reactive oxygen species metabolic process; positive regulation of smooth muscle cell migration; positive regulation of smooth muscle cell proliferation; protein autophosphorylation; regulation of actin cytoskeleton organization; regulation of peptidyl-tyrosine phosphorylation; retina vasculature development in camera-type eye; skeletal system morphogenesis; smooth muscle cell chemotaxis; smooth muscle tissue development; tissue homeostasis; vascular endothelial growth factor receptor signaling pathway; vascular endothelial growth factor-activated receptor activity                                                                                                                                                                                                                                                                                                                                                                                                                                                                                                                                                                                                                                                                                                                                                                                                                                                                                                                                                                                                                                             |
| Q06830 | PRDX1_HUMAN | PRDX1 PAGA PAGB TDPX2         | 199 cell proliferation; hydrogen peroxide catabolic process; melanosome; mitochondrion; nucleus; skeletal system development; thioredoxin peroxidase activity                                                                                                                                                                                                                                                                                                                                                                                                                                                                                                                                                                                                                                                                                                                                                                                                                                                                                                                                                                                                                                                                                                                                                                                                                                                                                                                                                                                                                                                                                                                                                                                                                                                                                                                                                                                                                                                                                                                                                                                                                                                                                                                                                                                                                                                                                                                                                                                                                                                                                                                                                                                                                                                                                                                                                                                                                                                                                                                                                                                                                                                        |

|        |              |                        |                                                                                                                                                                                                                                                                                                                                                                                                                                                                                                                                                                                                                                                                                                                                                                                                                                                                                                                                                                                                                                                                                                                                                                                                                                                                                                                                                                                                                                                                                                                                                                                                                                                                                                                                                                                                                                                                                                                                                                                                                                                                                                                                                                                                                                                                                                                                                                                                                                                                                                                                                                                                                                                                                                                                                                                                                                                                                                                                                                                                                                                                                   |
|--------|--------------|------------------------|-----------------------------------------------------------------------------------------------------------------------------------------------------------------------------------------------------------------------------------------------------------------------------------------------------------------------------------------------------------------------------------------------------------------------------------------------------------------------------------------------------------------------------------------------------------------------------------------------------------------------------------------------------------------------------------------------------------------------------------------------------------------------------------------------------------------------------------------------------------------------------------------------------------------------------------------------------------------------------------------------------------------------------------------------------------------------------------------------------------------------------------------------------------------------------------------------------------------------------------------------------------------------------------------------------------------------------------------------------------------------------------------------------------------------------------------------------------------------------------------------------------------------------------------------------------------------------------------------------------------------------------------------------------------------------------------------------------------------------------------------------------------------------------------------------------------------------------------------------------------------------------------------------------------------------------------------------------------------------------------------------------------------------------------------------------------------------------------------------------------------------------------------------------------------------------------------------------------------------------------------------------------------------------------------------------------------------------------------------------------------------------------------------------------------------------------------------------------------------------------------------------------------------------------------------------------------------------------------------------------------------------------------------------------------------------------------------------------------------------------------------------------------------------------------------------------------------------------------------------------------------------------------------------------------------------------------------------------------------------------------------------------------------------------------------------------------------------|
| Q70Z35 | PREX2_HUMAN  | PREX2 DEPDC2           | 1606 G-protein coupled receptor signaling pathway; Rac GTPase activator activity; Rac guanyl-nucleotide exchange factor activity; intracellular; intracellular signal transduction; phospholipid binding                                                                                                                                                                                                                                                                                                                                                                                                                                                                                                                                                                                                                                                                                                                                                                                                                                                                                                                                                                                                                                                                                                                                                                                                                                                                                                                                                                                                                                                                                                                                                                                                                                                                                                                                                                                                                                                                                                                                                                                                                                                                                                                                                                                                                                                                                                                                                                                                                                                                                                                                                                                                                                                                                                                                                                                                                                                                          |
| Q9H0F6 | SHRPN_HUMAN  | SHARPIN SIPL1 PSEC0216 | 387 LUBAC complex; apoptotic nuclear change; brain development; cytosol; keratinization; mitochondrion organization; negative regulation of inflammatory response; positive regulation of I-kappaB kinase/NF-kappaB cascade; postsynaptic density; protein homooligomerization; protein linear polyubiquitination; regulation of CD40 signaling pathway; regulation of tumor necrosis factor-mediated signaling pathway; zinc ion binding                                                                                                                                                                                                                                                                                                                                                                                                                                                                                                                                                                                                                                                                                                                                                                                                                                                                                                                                                                                                                                                                                                                                                                                                                                                                                                                                                                                                                                                                                                                                                                                                                                                                                                                                                                                                                                                                                                                                                                                                                                                                                                                                                                                                                                                                                                                                                                                                                                                                                                                                                                                                                                         |
| Q15796 | SMAD2_HUMAN  | SMAD2 MADH2 MADR2      | 467 SMAD protein complex; SMAD protein complex assembly; activin responsive factor complex; anterior/posterior pattern specification; cell fate commitment; chromatin binding; common-partner SMAD protein phosphorylation; cytosol; developmental growth; double-stranded DNA binding; embryonic cranial skeleton morphogenesis; embryonic foregut morphogenesis; endoderm development; in utero embryonic development; insulin secretion; intracellular signal transduction; lung development; mesoderm formation; negative regulation of cell proliferation; negative regulation of transcription, DNA-dependent; nodal signaling pathway; organ growth; palate development; pancreas development; paraxial mesoderm morphogenesis; pericardium development; positive regulation of BMP signaling pathway; positive regulation of epithelial to mesenchymal transition; positive regulation of nodal signaling pathway involved in determination of lateral mesoderm left/right asymmetry; positive regulation of transcription from RNA polymerase II promoter; post-embryonic development; primary miRNA processing; regulation of binding; regulation of transforming growth factor beta receptor signaling pathway; response to cholesterol; response to glucose stimulus; sequence-specific DNA binding transcription factor activity; transcription, DNA-dependent; transforming growth factor beta receptor signaling pathway; transforming growth factor beta receptor, pathway-specific cytoplasmic mediator activity; ureteric bud development; zygotic specification of dorsal/ventral axis                                                                                                                                                                                                                                                                                                                                                                                                                                                                                                                                                                                                                                                                                                                                                                                                                                                                                                                                                                                                                                                                                                                                                                                                                                                                                                                                                                                                                                                                         |
| P84022 | SMAD3_HUMAN  | SMAD3 MADH3            | 425 SMAD protein complex; SMAD protein complex assembly; T cell activation; activation of cysteine-type endopeptidase activity involved in apoptotic process; activation of pro-apoptotic gene products; cell cycle arrest; cell-cell junction organization; chromatin DNA binding; core promoter proximal region sequence-specific DNA binding; cytosol; developmental growth; double-stranded DNA binding; embryonic cranial skeleton morphogenesis; embryonic foregut morphogenesis; embryonic pattern specification; endoderm development; evasion of host defenses by virus; heart looping; immune response; immune system development; in utero embryonic development; induction of apoptosis; lens fiber cell differentiation; liver development; mesoderm formation; negative regulation of apoptotic process; negative regulation of cell growth; negative regulation of inflammatory response; negative regulation of mitotic cell cycle; negative regulation of osteoblast differentiation; negative regulation of osteoblast proliferation; negative regulation of protein catabolic process; negative regulation of protein phosphorylation; negative regulation of transcription from RNA polymerase II promoter; negative regulation of wound healing; nodal signaling pathway; nuclear inner membrane; nucleoplasm; osteoblast development; paraxial mesoderm morphogenesis; pericardium development; plasma membrane; positive regulation of alkaline phosphatase activity; positive regulation of bone mineralization; positive regulation of canonical Wnt receptor signaling pathway; positive regulation of catenin import into nucleus; positive regulation of cell migration; positive regulation of chondrocyte differentiation; positive regulation of epithelial to mesenchymal transition; positive regulation of focal adhesion assembly; positive regulation of interleukin-1 beta production; positive regulation of positive chemotaxis; positive regulation of stress fiber assembly; positive regulation of transcription factor import into nucleus; positive regulation of transcription from RNA polymerase II promoter; positive regulation of transforming growth factor beta3 production; primary miRNA processing; protein stabilization; receptor complex; regulation of binding; regulation of epithelial cell proliferation; regulation of immune response; regulation of striated muscle tissue development; regulation of transforming growth factor beta receptor signaling pathway; regulation of transforming growth factor beta2 production; release of cytochrome c from mitochondria; response to hypoxia; sequence-specific DNA binding transcription factor activity; somitogenesis; thyroid gland development; transcription factor complex; transcription, DNA-dependent; transdifferentiation; transforming growth factor beta receptor signaling pathway; transforming growth factor beta receptor, pathway-specific cytoplasmic mediator activity; transport; ureteric bud development; wound healing; zinc ion binding |
| Q15831 | STK11_HUMAN  | STK11 LKB1 PJS         | 433 ATP binding; Golgi localization; anoikis; autophagy; axonogenesis; canonical Wnt receptor signaling pathway; cell cycle arrest; cytoplasm; cytosol; energy reserve metabolic process; establishment of cell polarity glucose homeostasis; insulin receptor signaling pathway; magnesium ion binding; membrane; mitochondrion; negative regulation of cell growth; negative regulation of cell proliferation; negative regulation of epithelial cell proliferation involved in prostate gland development; nucleus; positive regulation of axonogenesis; positive regulation of gluconeogenesis; positive regulation of transforming growth factor beta receptor signaling pathway; protein autophosphorylation; protein complex; protein heterooligomerization; protein kinase activator activity; protein serine/threonine kinase activity; regulation of Wnt receptor signaling pathway; regulation of fatty acid biosynthetic process; regulation of fatty acid oxidation; regulation of protein kinase B signaling cascade; response to DNA damage stimulus; response to glucagon stimulus; response to ionizing radiation; response to lipid; signal transduction by p53 class mediator resulting in induction of apoptosis; small molecule metabolic process; spermatid development; tissue homeostasis; vasculature development                                                                                                                                                                                                                                                                                                                                                                                                                                                                                                                                                                                                                                                                                                                                                                                                                                                                                                                                                                                                                                                                                                                                                                                                                                                                                                                                                                                                                                                                                                                                                                                                                                                                                                                                        |
| P10599 | THIO_HUMAN   | TXN TRDX TRX TRX1      | 105 cell proliferation; cell redox homeostasis; cell-cell signaling; cellular component movement; cytosol; electron carrier activity; electron transport chain; extracellular region; glycerol ether metabolic process; innate immune response; mitochondrion; negative regulation of protein export from nucleus; nucleobase-containing small molecule interconversion; nucleoplasm; nucleotide-binding domain, leucine rich repeat containing receptor signaling pathway; oxidation-reduction process; peptide disulfide oxidoreductase activity; positive regulation of DNA binding; protein disulfide oxidoreductase activity; regulation of protein import into nucleus, translocation; regulation of transcription, DNA-dependent; response to radiation; transcription, DNA-dependent; transport                                                                                                                                                                                                                                                                                                                                                                                                                                                                                                                                                                                                                                                                                                                                                                                                                                                                                                                                                                                                                                                                                                                                                                                                                                                                                                                                                                                                                                                                                                                                                                                                                                                                                                                                                                                                                                                                                                                                                                                                                                                                                                                                                                                                                                                                           |
| O00308 | WWP2_HUMAN   | WWP2                   | 870 cytoplasm; negative regulation of protein transport; negative regulation of sequence-specific DNA binding transcription factor activity; negative regulation of transcription from RNA polymerase II promoter; negative regulation of transporter activity; nucleus; proteasomal ubiquitin-dependent protein catabolic process; protein K63-linked ubiquitination; protein ubiquitination involved in ubiquitin-dependent protein catabolic process; ubiquitin ligase complex; ubiquitin-protein ligase activity; viral entry into host cell                                                                                                                                                                                                                                                                                                                                                                                                                                                                                                                                                                                                                                                                                                                                                                                                                                                                                                                                                                                                                                                                                                                                                                                                                                                                                                                                                                                                                                                                                                                                                                                                                                                                                                                                                                                                                                                                                                                                                                                                                                                                                                                                                                                                                                                                                                                                                                                                                                                                                                                                  |
| G7MXH2 | G7MXH2_MACMU | EGK_17502              | 1792 ATP binding; motor activity; myosin complex; zinc ion binding                                                                                                                                                                                                                                                                                                                                                                                                                                                                                                                                                                                                                                                                                                                                                                                                                                                                                                                                                                                                                                                                                                                                                                                                                                                                                                                                                                                                                                                                                                                                                                                                                                                                                                                                                                                                                                                                                                                                                                                                                                                                                                                                                                                                                                                                                                                                                                                                                                                                                                                                                                                                                                                                                                                                                                                                                                                                                                                                                                                                                |
| G3X9Y9 | G3X9Y9_MOUSE | Myo5b mCG_123286       | 1844 ATP binding; motor activity; myosin complex                                                                                                                                                                                                                                                                                                                                                                                                                                                                                                                                                                                                                                                                                                                                                                                                                                                                                                                                                                                                                                                                                                                                                                                                                                                                                                                                                                                                                                                                                                                                                                                                                                                                                                                                                                                                                                                                                                                                                                                                                                                                                                                                                                                                                                                                                                                                                                                                                                                                                                                                                                                                                                                                                                                                                                                                                                                                                                                                                                                                                                  |
| F1NK41 | F1NK41_CHICK | MYO5A                  | 1857 ATP binding; Golgi apparatus; actin filament-based movement; actomyosin; anagen; calcium ion binding; endoplasmic reticulum localization; exocytosis; insulin secretion; intermediate filament; locomotion involved in locomotory behavior; long-chain fatty acid biosynthetic process; melanin biosynthetic process; melanocyte differentiation; melanosome; melanosome transport; microfilament motor activity myelination; myosin complex; neuronal cell body; odontogenesis; photoreceptor outer segment; regulation of inositol 1,4,5-trisphosphate-sensitive calcium-release channel activity; ruffle; secretory granule; secretory granule localization; synapse organization; synaptic transmission; visual perception                                                                                                                                                                                                                                                                                                                                                                                                                                                                                                                                                                                                                                                                                                                                                                                                                                                                                                                                                                                                                                                                                                                                                                                                                                                                                                                                                                                                                                                                                                                                                                                                                                                                                                                                                                                                                                                                                                                                                                                                                                                                                                                                                                                                                                                                                                                                               |
| Q9UJX3 | APC7_HUMAN   | ANAPC7 APC7            | 599 anaphase-promoting complex; anaphase-promoting complex-dependent proteasomal ubiquitin-dependent protein catabolic process; cell division; cytosol; mitosis; mitotic cell cycle spindle assembly checkpoint; negative regulation of ubiquitin-protein ligase activity involved in mitotic cell cycle; nucleoplasm; positive regulation of ubiquitin-protein ligase activity involved in mitotic cell cycle; protein K11-linked ubiquitin;                                                                                                                                                                                                                                                                                                                                                                                                                                                                                                                                                                                                                                                                                                                                                                                                                                                                                                                                                                                                                                                                                                                                                                                                                                                                                                                                                                                                                                                                                                                                                                                                                                                                                                                                                                                                                                                                                                                                                                                                                                                                                                                                                                                                                                                                                                                                                                                                                                                                                                                                                                                                                                     |
| P32121 | ARRB2_HUMAN  | ARRB2 ARB2 ARR2        | 409 G-protein coupled receptor internalization; Notch signaling pathway; adult walking behavior; cell chemotaxis; coated pit; cytoplasmic membrane-bounded vesicle; cytoplasmic vesicle; cytosol; desensitization of G-protein coupled receptor protein signaling pathway by arrestin; negative regulation of NF-kappaB transcription factor activity; negative regulation of interleukin-1 beta production; negative regulation of interleukin-12 production; negative regulation of interleukin-6 production; negative regulation of natural killer cell mediated cytotoxicity; negative regulation of protein ubiquitination; negative regulation of toll-like receptor signaling pathway; negative regulation of tumor necrosis factor production; nucleus; plasma membrane; platelet activation; positive regulation of ERK1 and ERK2 cascade; positive regulation of protein kinase B signaling cascade; positive regulation of protein ubiquitination; positive regulation of synaptic transmission, dopaminergic; proteasomal ubiquitin-dependent protein catabolic process; protein transport; protein ubiquitination; regulation of androgen receptor signaling pathway; regulation of protein phosphorylation; transcription from RNA polymerase II promoter; transforming growth factor beta receptor signaling pathway                                                                                                                                                                                                                                                                                                                                                                                                                                                                                                                                                                                                                                                                                                                                                                                                                                                                                                                                                                                                                                                                                                                                                                                                                                                                                                                                                                                                                                                                                                                                                                                                                                                                                                                                               |



|        |             |                                |                                                                                                                                                                                                                                                                                                                                                                                                                                                                                                                       |
|--------|-------------|--------------------------------|-----------------------------------------------------------------------------------------------------------------------------------------------------------------------------------------------------------------------------------------------------------------------------------------------------------------------------------------------------------------------------------------------------------------------------------------------------------------------------------------------------------------------|
| P30260 | CDC27_HUMAN | CDC27 ANAPC3 D0S1430E D17S978E | 824 anaphase-promoting complex; anaphase-promoting complex-dependent proteasomal ubiquitin-dependent protein catabolic process; cell proliferation; centrosome; cytosol; mitotic cell cycle spindle assembly checkpoint; mitotic metaphase/anaphase transition; negative regulation of ubiquitin-protein ligase activity involved in mitotic cell cycle; nucleoplasm; positive regulation of ubiquitin-protein ligase activity involved in mitotic cell cycle; protein K11-linked ubiquitination; spindle microtubule |
| Q9NZM5 | GSCR2_HUMAN | GLTSCR2                        | 478 nucleolus                                                                                                                                                                                                                                                                                                                                                                                                                                                                                                         |
| Q96EZ8 | MCRS1_HUMAN | MCRS1 INO80Q MSP58             | 462 DNA recombination; DNA repair; Ino80 complex; MLL1 complex; cytoplasm; histone H4-K16 acetylation; histone H4-K5 acetylation; histone H4-K8 acetylation; histone acetyltransferase complex; nucleolus; regulation of transcription, DNA-dependent; transcription, DNA-dependent                                                                                                                                                                                                                                   |
| Q14764 | MVP_HUMAN   | MVP LRP                        | 893 cytoplasm; mRNA transport; nuclear pore; nucleus; protein transport; response to drug; ribonucleoprotein complex                                                                                                                                                                                                                                                                                                                                                                                                  |

**SUPPLEMENTARY TABLE S3**  
**DISORDER SCORE FOR MAPPED PROTEINS**

| Uniprot ID | Protein name | No. of AA | No. of residues disordered | No. of disordered stretches (>30) | D/O | % of protein disordered |
|------------|--------------|-----------|----------------------------|-----------------------------------|-----|-------------------------|
| Q15796     | SMAD-2       | 467       | 86                         | 1                                 | D   | 18.41541756             |
| P84022     | SMAD-3       | 425       | 88                         | 1                                 | D   | 20.70588235             |
| O00308     | WWP-2        | 870       | 252                        | 1                                 | D   | 28.96551724             |
| P10275     | AR           | 919       | 392                        | 3                                 | D   | 42.65505985             |
| P10599     | TRDX         | 105       | 22                         | 0                                 | O   | 20.95238095             |
| Q92831     | PCAF         | 832       | 223                        | 2                                 | D   | 26.80288462             |
| P49407     | ARRB1        | 418       | 91                         | 1                                 | D   | 21.77033493             |
| P32121     | ARRB2        | 409       | 45                         | 0                                 | O   | 11.00244499             |
| P35226     | BMI-1        | 326       | 148                        | 1                                 | D   | 45.39877301             |
| Q06830     | Prdx-1       | 199       | 27                         | 0                                 | O   | 13.5678392              |
| P42685     | RAK          | 505       | 30                         | 0                                 | O   | 5.940594059             |
| P04637     | p53          | 393       | 216                        | 3                                 | D   | 54.96183206             |
| Q03135     | CAV1         | 178       | 18                         | 0                                 | O   | 10.11235955             |
| Q15831     | STK-11       | 433       | 109                        | 1                                 | D   | 25.17321016             |
| Q14764     | MVP          | 893       | 162                        | 2                                 | D   | 18.14109742             |
| Q9NZM5     | PICT-1       | 478       | 396                        | 4                                 | D   | 82.84518828             |
| P08473     | NEP          | 750       | 53                         | 0                                 | O   | 7.066666667             |
| F1NK41     | Myo5a        | 1857      | 520                        | 5                                 | D   | 28.00215401             |
| G3X9Y9     | Myo5b        | 1844      | 408                        | 4                                 | D   | 22.12581345             |
| G7MXH2     | Myo5c        | 1792      | 266                        | 3                                 | D   | 14.84375                |
| Q96EZ8     | MSP-58       | 462       | 161                        | 1                                 | D   | 34.84848485             |
| Q70Z35     | PREX-2       | 1606      | 212                        | 2                                 | D   | 13.20049813             |
| P30260     | APC-3        | 824       | 274                        | 2                                 | D   | 33.25242718             |
| Q9UJX5     | APC-4        | 808       | 72                         | 1                                 | D   | 8.910891089             |
| Q9UJX4     | APC-5        | 755       | 100                        | 1                                 | D   | 13.24503311             |
| Q9UJX3     | APC-7        | 599       | 118                        | 1                                 | D   | 19.69949917             |
| P49452     | Cenpc-1      | 906       | 702                        | 3                                 | D   | 77.48344371             |
| Q9H0F6     | Sharpin      | 387       | 188                        | 2                                 | D   | 48.57881137             |
| P09619     | PDGFRB       | 1106      | 149                        | 1                                 | D   | 13.47197107             |
| Q12959     | DLG-1        | 904       | 259                        | 3                                 | D   | 28.65044248             |
| Q96QZ7     | MAGI-1       | 1491      | 686                        | 7                                 | D   | 46.00938967             |
| O88382     | MAGI-2       | 1277      | 500                        | 5                                 | D   | 39.15426782             |
| Q5TCQ9     | MAGI-3       | 1506      | 589                        | 5                                 | D   | 39.11022576             |
| Q9R1L5     | MAST-1       | 1570      | 987                        | 5                                 | D   | 62.86624204             |
| Q60592     | MAST-2       | 1734      | 1138                       | 8                                 | D   | 65.62860438             |
| O60307     | MAST-3       | 1309      | 765                        | 3                                 | D   | 58.44155844             |
| O14745     | NHERF-1      | 358       | 187                        | 3                                 | D   | 52.23463687             |
| Q15599     | NHERF-2      | 337       | 209                        | 3                                 | D   | 62.01780415             |

|        |       |     |    |   |   |             |
|--------|-------|-----|----|---|---|-------------|
| O00254 | Par-3 | 374 | 13 | 0 | O | 3.475935829 |
| P34968 | HTR2C | 459 | 66 | 1 | D | 14.37908497 |

**SUPPLEMENTARY TABLE S4****IDENTIFICATION OF CANCER AS THE MOST OVERREPRESENTED DISEASE IN THE PRIMARY INTERACTOME**

© 2000-2012 Ingenuity Systems, Inc. All rights reserved.

| Category                               | p-value           | Molecules                                                                                                   |
|----------------------------------------|-------------------|-------------------------------------------------------------------------------------------------------------|
| Cancer                                 | 2.32E-05-6.24E-03 | TP53 (includes EG:22059),SMAD2,SLC9A3R1,STK11,BMI1,SMAD3,KAT2B,HTR2C,GLTSCR2,AR,ARRB1,SLC9A3R2,MCRS1,PDGFRB |
| Cardiovascular Disease                 | 1.77E-03-6.24E-03 | TP53 (includes EG:22059),SMAD2,AR,SMAD3,PDGFRB                                                              |
| Connective Tissue Disorders            | 2.59E-04-6.24E-03 | TP53 (includes EG:22059),SMAD2,AR,SMAD3,STK11,BMI1                                                          |
| Dermatological Diseases and Conditions | 2.09E-03-4.17E-03 | TP53 (includes EG:22059),STK11,SMAD3                                                                        |
| Developmental Disorder                 | 3.24E-04-6.24E-03 | MYO5A,TP53 (includes EG:22059),DLG1,SMAD2,ARRB1,AR,SLC9A3R1,STK11,SMAD3,MYO5B                               |
| Endocrine System Disorders             | 9.1E-04-4.17E-03  | TP53 (includes EG:22059),SMAD2,AR,PDGFRB                                                                    |
| Gastrointestinal Disease               | 4.21E-06-6.24E-03 | TP53 (includes EG:22059),SMAD2,BMI1,SMAD3,STK11,MYO5B,PDGFRB                                                |
| Hematological Disease                  | 7.04E-04-5.83E-03 | TP53 (includes EG:22059),AR,STK11,PDGFRB                                                                    |
| Hepatic System Disease                 | 3.28E-03-5.63E-03 | TP53 (includes EG:22059),SMAD2,SMAD3,STK11                                                                  |
| Hereditary Disorder                    | 2.09E-03-4.17E-03 | MYO5A,TP53 (includes EG:22059),AR,SLC9A3R1,STK11                                                            |
| Hypersensitivity Response              | 2.09E-03-2.09E-03 | SMAD3                                                                                                       |
| Immunological Disease                  | 7.04E-04-5.83E-03 | MYO5A,TP53 (includes EG:22059),PDGFRB                                                                       |
| Infectious Disease                     | 9.47E-04-4.17E-03 | TP53 (includes EG:22059),MYO5B                                                                              |
| Inflammatory Disease                   | 4.21E-06-3.35E-03 | TP53 (includes EG:22059),SMAD2,AR,SMAD3                                                                     |
| Inflammatory Response                  | 2.09E-03-6.24E-03 | SMAD3                                                                                                       |
| Metabolic Disease                      | 2.13E-03-4.17E-03 | MYO5A,TP53 (includes EG:22059),SLC9A3R1                                                                     |
| Neurological Disease                   | 5.07E-04-4.78E-03 | TP53 (includes EG:22059),SMAD2,GLTSCR2,AR,ARRB1,SLC9A3R1,STK11,SMAD3,BMI1,PDGFRB                            |
| Ophthalmic Disease                     | 2.09E-03-2.09E-03 | TP53 (includes EG:22059)                                                                                    |
| Organismal Injury and Abnormalities    | 1.5E-04-6.24E-03  | TP53 (includes EG:22059),HTR2C,SMAD2,AR,STK11,SMAD3,PDGFRB                                                  |
| Renal and Urological Disease           | 3.24E-04-2.09E-03 | DLG1,SMAD2,SMAD3,PDGFRB                                                                                     |
| Reproductive System Disease            | 1.82E-03-6.24E-03 | TP53 (includes EG:22059),KAT2B,GLTSCR2,AR,STK11,BMI1,PDGFRB                                                 |
| Respiratory Disease                    | 2.09E-03-6.24E-03 | TP53 (includes EG:22059),DLG1,ARRB1,AR,PDGFRB                                                               |
| Skeletal and Muscular Disorders        | 2.59E-04-4.17E-03 | TP53 (includes EG:22059),SMAD2,AR,BMI1,SMAD3,STK11                                                          |

**SUPPLEMENTARY TABLE 5**  
**DISORDER PREDICTION FOR PTEN SECONDARY INTERACTOME**

| Name   | N    | R%_meta | CH_dist2 | dCDFs  |
|--------|------|---------|----------|--------|
| Q9UIS9 | 605  | 0.534   | 0.03     | -0.332 |
| Q9BS18 | 74   | 0.703   | 0.192    | -0.183 |
| Q8NHZ8 | 85   | 1       | 0.103    | -0.534 |
| Q99459 | 802  | 0.522   | 0.034    | -0.304 |
| Q13573 | 536  | 0.513   | 0.122    | -0.256 |
| Q9BS18 | 74   | 0.703   | 0.192    | -0.183 |
| Q8NHZ8 | 85   | 1       | 0.103    | -0.534 |
| Q9BS18 | 74   | 0.703   | 0.192    | -0.183 |
| Q8NHZ8 | 85   | 1       | 0.103    | -0.534 |
| A0JLT2 | 244  | 0.693   | 0.117    | -0.398 |
| Q9BS18 | 74   | 0.703   | 0.192    | -0.183 |
| Q8NHZ8 | 85   | 1       | 0.103    | -0.534 |
| Q99459 | 802  | 0.522   | 0.034    | -0.304 |
| Q99933 | 345  | 0.53    | 0.016    | -0.26  |
| P38398 | 1863 | 0.583   | 0.014    | -0.325 |
| Q00987 | 491  | 0.601   | 0.057    | -0.261 |
| Q9Y252 | 685  | 0.758   | 0.087    | -0.377 |
| P82094 | 1093 | 0.801   | 0.046    | -0.491 |
| P35269 | 517  | 0.723   | 0.138    | -0.357 |
| P63165 | 101  | 0.307   | 0.066    | -0.199 |
| O95251 | 611  | 0.489   | 0.047    | -0.133 |
| Q9UER7 | 740  | 0.704   | 0.061    | -0.31  |
| Q9JLQ4 | 704  | 0.518   | 0.015    | -0.261 |
| P31946 | 246  | 0.354   | 0.017    | -0.092 |
| P61981 | 247  | 0.328   | 0.006    | -0.042 |
| Q99933 | 345  | 0.53    | 0.016    | -0.26  |
| Q9NYF8 | 920  | 0.907   | 0.305    | -0.508 |
| Q05682 | 793  | 0.909   | 0.273    | -0.531 |
| P62158 | 149  | 0.43    | 0.098    | -0.152 |
| P09496 | 248  | 0.661   | 0.054    | -0.348 |
| O54946 | 365  | 0.762   | 0.042    | -0.471 |
| Q13283 | 466  | 0.575   | 0.026    | -0.198 |
| P16403 | 213  | 0.808   | 0.204    | -0.493 |
| Q92522 | 213  | 0.77    | 0.224    | -0.338 |
| P23527 | 126  | 0.437   | 0.105    | -0.151 |
| P84243 | 136  | 0.551   | 0.073    | -0.038 |
| P62805 | 103  | 0.505   | 0.071    | -0.033 |
| O35387 | 280  | 0.843   | 0.124    | -0.501 |
| Q7Z4V5 | 671  | 0.768   | 0.162    | -0.393 |

|        |      |       |       |        |
|--------|------|-------|-------|--------|
| Q00839 | 825  | 0.541 | 0.051 | -0.185 |
| P23588 | 611  | 0.81  | 0.242 | -0.486 |
| Q9Y496 | 699  | 0.381 | 0.007 | -0.149 |
| Q86UP2 | 1357 | 0.553 | 0.039 | -0.471 |
| Q9UHB6 | 759  | 0.773 | 0.073 | -0.454 |
| P46821 | 2468 | 0.718 | 0.061 | -0.332 |
| Q00987 | 491  | 0.601 | 0.057 | -0.261 |
| Q6WCQ1 | 1025 | 0.597 | 0.05  | -0.32  |
| P35579 | 1960 | 0.544 | 0.022 | -0.205 |
| Q60795 | 597  | 0.625 | 0.035 | -0.36  |
| Q14978 | 699  | 0.903 | 0.144 | -0.481 |
| Q9NPE3 | 64   | 0.375 | 0.106 | -0.212 |
| P06748 | 294  | 0.588 | 0.115 | -0.189 |
| P19338 | 710  | 0.687 | 0.165 | -0.398 |
| Q13523 | 1007 | 0.601 | 0.235 | -0.221 |
| P98175 | 930  | 0.661 | 0.073 | -0.363 |
| P61313 | 204  | 0.539 | 0.212 | -0.079 |
| P09651 | 372  | 0.573 | 0.028 | -0.264 |
| P51991 | 378  | 0.606 | 0.06  | -0.264 |
| Q13464 | 1354 | 0.525 | 0.037 | -0.186 |
| O15446 | 510  | 0.869 | 0.041 | -0.465 |
| P62241 | 208  | 0.471 | 0.212 | -0.081 |
| Q92541 | 710  | 0.703 | 0.108 | -0.38  |
| Q13435 | 895  | 0.715 | 0.063 | -0.391 |
| P62314 | 119  | 0.37  | 0.049 | -0.002 |
| Q13813 | 2472 | 0.114 | 0.024 | -0.054 |
| Q14247 | 550  | 0.351 | 0.109 | -0.383 |
| Q9UQ35 | 2752 | 0.996 | 0.299 | -0.534 |
| Q13428 | 1488 | 0.952 | 0.029 | -0.499 |
| Q86V81 | 257  | 0.615 | 0.061 | -0.271 |
| P67936 | 248  | 0.907 | 0.149 | -0.515 |
| Q9Y2W1 | 955  | 0.913 | 0.316 | -0.51  |
| P25490 | 414  | 0.551 | 0.019 | -0.307 |
| P08670 | 466  | 0.515 | 0.029 | -0.321 |
| P20152 | 466  | 0.53  | 0.032 | -0.331 |
| P67809 | 324  | 0.799 | 0.236 | -0.394 |
| O95218 | 330  | 0.782 | 0.357 | -0.458 |
| Q3MIH3 | 128  | 0.219 | 0.061 | -0.012 |
| Q5RKT7 | 156  | 0.359 | 0.09  | -0.132 |
| Q8TBK5 | 288  | 0.438 | 0.142 | -0.179 |
| Q13428 | 1488 | 0.952 | 0.029 | -0.499 |
| Q14978 | 699  | 0.903 | 0.144 | -0.481 |
| Q92522 | 213  | 0.77  | 0.224 | -0.338 |
| Q02539 | 215  | 0.8   | 0.216 | -0.48  |

|        |      |       |       |        |
|--------|------|-------|-------|--------|
| O43719 | 755  | 0.675 | 0.31  | -0.305 |
| P30414 | 1462 | 0.83  | 0.249 | -0.423 |
| Q14247 | 550  | 0.351 | 0.109 | -0.383 |
| P55209 | 391  | 0.368 | 0.166 | -0.138 |
| Q8TBK5 | 288  | 0.438 | 0.142 | -0.179 |
| Q9NPE3 | 64   | 0.375 | 0.106 | -0.212 |
| Q9BUA3 | 381  | 0.856 | 0.022 | -0.495 |
| Q9NQ92 | 184  | 0.837 | 0.208 | -0.364 |
| Q5RKT7 | 156  | 0.359 | 0.09  | -0.132 |
| Q3MIH3 | 128  | 0.219 | 0.061 | -0.012 |
| P09497 | 229  | 0.703 | 0.089 | -0.438 |
| Q16643 | 649  | 0.732 | 0.098 | -0.364 |
| P23527 | 126  | 0.437 | 0.105 | -0.151 |
| P46821 | 2468 | 0.718 | 0.061 | -0.332 |
| Q7Z4V5 | 671  | 0.768 | 0.162 | -0.393 |
| Q8WVC0 | 666  | 0.878 | 0.39  | -0.444 |
| P35580 | 1976 | 0.562 | 0.029 | -0.196 |
| P16403 | 213  | 0.808 | 0.204 | -0.493 |
| P98175 | 930  | 0.661 | 0.073 | -0.363 |
| Q13813 | 2472 | 0.114 | 0.024 | -0.054 |
| P67809 | 324  | 0.799 | 0.236 | -0.394 |
| P19338 | 710  | 0.687 | 0.165 | -0.398 |
| P54105 | 237  | 0.684 | 0.123 | -0.277 |
| P23588 | 611  | 0.81  | 0.242 | -0.486 |
| P09651 | 372  | 0.573 | 0.028 | -0.264 |
| P46778 | 160  | 0.531 | 0.164 | -0.122 |
| Q01082 | 2364 | 0.204 | 0.009 | -0.004 |
| P08670 | 466  | 0.515 | 0.029 | -0.321 |
| Q9NYF8 | 920  | 0.907 | 0.305 | -0.508 |
| Q86V81 | 257  | 0.615 | 0.061 | -0.271 |
| P31946 | 246  | 0.354 | 0.017 | -0.092 |
| P07910 | 306  | 0.634 | 0.074 | -0.322 |
| P46779 | 137  | 0.664 | 0.183 | -0.189 |
| O43390 | 633  | 0.43  | 0.027 | -0.132 |
| Q9Y2W1 | 955  | 0.913 | 0.316 | -0.51  |
| Q15233 | 471  | 0.569 | 0.052 | -0.305 |
| P61313 | 204  | 0.539 | 0.212 | -0.079 |
| P61981 | 247  | 0.328 | 0.006 | -0.042 |
| P16989 | 372  | 0.823 | 0.109 | -0.423 |
| P23246 | 707  | 0.748 | 0.099 | -0.353 |
| P50914 | 215  | 0.591 | 0.075 | -0.169 |
| Q07020 | 188  | 0.452 | 0.155 | -0.094 |
| Q14103 | 355  | 0.561 | 0.022 | -0.353 |
| P35579 | 1960 | 0.544 | 0.022 | -0.205 |

|        |      |       |       |        |
|--------|------|-------|-------|--------|
| P62316 | 118  | 0.61  | 0.046 | -0.147 |
| P09496 | 248  | 0.661 | 0.054 | -0.348 |
| P39019 | 145  | 0.331 | 0.02  | -0.083 |
| Q9UHB6 | 759  | 0.773 | 0.073 | -0.454 |
| Q8NC51 | 408  | 0.841 | 0.138 | -0.485 |
| Q00839 | 825  | 0.541 | 0.051 | -0.185 |
| P62241 | 208  | 0.471 | 0.212 | -0.081 |
| P41227 | 235  | 0.306 | 0.01  | -0.057 |
| O95218 | 330  | 0.782 | 0.357 | -0.458 |
| P62314 | 119  | 0.37  | 0.049 | -0.002 |
| Q9UQ35 | 2752 | 0.996 | 0.299 | -0.534 |
| P62753 | 249  | 0.594 | 0.194 | -0.179 |
| Q9UN86 | 482  | 0.61  | 0.07  | -0.217 |
| O14974 | 1030 | 0.739 | 0.086 | -0.346 |
| Q14004 | 1512 | 0.689 | 0.031 | -0.318 |
| Q13435 | 895  | 0.715 | 0.063 | -0.391 |
| P84098 | 196  | 0.653 | 0.301 | -0.26  |
| P36578 | 427  | 0.45  | 0.09  | -0.079 |
| P49454 | 3210 | 0.653 | 0.06  | -0.476 |
| P78362 | 688  | 0.465 | 0.034 | -0.1   |
| P61254 | 145  | 0.628 | 0.247 | -0.265 |
| P42766 | 123  | 0.707 | 0.3   | -0.361 |
| P55196 | 1824 | 0.524 | 0.013 | -0.172 |
| P06748 | 294  | 0.588 | 0.115 | -0.189 |
| P62158 | 149  | 0.43  | 0.098 | -0.152 |
| Q13523 | 1007 | 0.601 | 0.235 | -0.221 |
| Q9Y3U8 | 105  | 0.79  | 0.229 | -0.346 |
| S100A9 | 113  | 0.54  | 0.014 | -0.352 |
| Q00987 | 491  | 0.601 | 0.057 | -0.261 |
| Q8VDS3 | 158  | 0.677 | 0.035 | -0.26  |
| P30658 | 519  | 0.744 | 0.015 | -0.376 |
| Q9HC52 | 389  | 0.614 | 0.099 | -0.259 |
| O00257 | 560  | 0.839 | 0.041 | -0.41  |
| Q8IY57 | 180  | 0.939 | 0.19  | -0.531 |
| Q8N488 | 228  | 0.886 | 0.152 | -0.498 |
| P62805 | 103  | 0.505 | 0.071 | -0.033 |
| Q8NFW9 | 859  | 0.522 | 0.015 | -0.302 |
| O95810 | 425  | 0.795 | 0.066 | -0.436 |
| Q60865 | 707  | 0.791 | 0.053 | -0.435 |
| Q9CR02 | 221  | 0.538 | 0.102 | -0.259 |
| P24788 | 784  | 0.588 | 0.177 | -0.188 |
| Q6PDQ2 | 1915 | 0.409 | 0.02  | -0.101 |
| Q9DA19 | 450  | 0.716 | 0.319 | -0.434 |
| O35492 | 638  | 0.469 | 0.079 | -0.108 |



|        |      |       |       |        |
|--------|------|-------|-------|--------|
| Q61545 | 655  | 0.899 | 0.103 | -0.473 |
| Q61584 | 677  | 0.465 | 0.007 | -0.106 |
| P70696 | 127  | 0.425 | 0.052 | -0.142 |
| P84228 | 136  | 0.544 | 0.069 | -0.042 |
| Q5SVQ0 | 613  | 0.491 | 0.03  | -0.134 |
| P14733 | 588  | 0.541 | 0.025 | -0.386 |
| Q8K310 | 846  | 0.635 | 0.042 | -0.27  |
| P97434 | 1024 | 0.6   | 0.035 | -0.311 |
| Q91W39 | 579  | 0.748 | 0.097 | -0.366 |
| P30415 | 1453 | 0.866 | 0.239 | -0.44  |
| A2AR02 | 752  | 0.783 | 0.436 | -0.389 |
| Q61136 | 1007 | 0.599 | 0.231 | -0.217 |
| Q9DBU5 | 667  | 0.763 | 0.023 | -0.36  |
| Q9D083 | 201  | 0.547 | 0.007 | -0.178 |
| Q569Z6 | 951  | 0.925 | 0.317 | -0.512 |
| Q8K4P0 | 1330 | 0.706 | 0.079 | -0.304 |
| A2A9P5 | 784  | 0.588 | 0.177 | -0.188 |
| B9EI85 | 136  | 0.544 | 0.069 | -0.042 |
| Q5BL18 | 846  | 0.635 | 0.042 | -0.27  |
| A2AJI4 | 951  | 0.925 | 0.317 | -0.512 |
| Q8R5E6 | 350  | 0.623 | 0.224 | -0.283 |
| Q8BR71 | 708  | 0.579 | 0.096 | -0.251 |
| E9PYL1 | 1952 | 0.373 | 0.009 | -0.084 |
| Q3UFG2 | 569  | 0.608 | 0.021 | -0.427 |
| Q3V0L1 | 475  | 0.811 | 0.044 | -0.476 |
| A2AWQ8 | 450  | 0.716 | 0.319 | -0.434 |
| Q3TLX0 | 948  | 0.575 | 0.06  | -0.246 |
| Q3TFD9 | 466  | 0.541 | 0.034 | -0.336 |
| P70281 | 254  | 0.52  | 0.032 | -0.424 |
| Q8CJI4 | 398  | 0.847 | 0.265 | -0.448 |
| Q9CV89 | 235  | 0.936 | 0.14  | -0.505 |
| Q3TWV0 | 466  | 0.515 | 0.025 | -0.295 |
| P15331 | 475  | 0.674 | 0.01  | -0.437 |
| A0PJG9 | 587  | 1     | 0.216 | -0.534 |
| Q05BN4 | 194  | 0.851 | 0.137 | -0.503 |
| Q8BU35 | 315  | 0.695 | 0.117 | -0.277 |
| Q8CIA8 | 1201 | 0.523 | 0.005 | -0.334 |
| O94850 | 711  | 0.902 | 0.051 | -0.46  |
| P97837 | 1059 | 0.557 | 0.016 | -0.383 |
| P01106 | 439  | 0.608 | 0.002 | -0.351 |
| Q13573 | 536  | 0.513 | 0.122 | -0.256 |
| Q99459 | 802  | 0.522 | 0.034 | -0.304 |
| Q86WP2 | 473  | 0.825 | 0.119 | -0.471 |
| Q96CN9 | 775  | 0.613 | 0.019 | -0.391 |

|          |      |       |       |        |
|----------|------|-------|-------|--------|
| Q9Y2W2   | 641  | 0.888 | 0.044 | -0.492 |
| P51116   | 673  | 0.483 | 0.003 | -0.119 |
| P0C1Z6   | 253  | 0.85  | 0.063 | -0.426 |
| Q9BZI7   | 483  | 0.799 | 0.302 | -0.425 |
| Q9C086   | 356  | 0.978 | 0.044 | -0.53  |
| Q9UER7   | 740  | 0.704 | 0.061 | -0.31  |
| P02545   | 664  | 0.738 | 0.005 | -0.421 |
| P46783   | 165  | 0.491 | 0.076 | -0.19  |
| Q9H1E3   | 243  | 1     | 0.376 | -0.534 |
| Q9BRK5   | 362  | 0.138 | 0.033 | -0.067 |
| Q86UE4   | 582  | 0.845 | 0.09  | -0.442 |
| Q14978   | 699  | 0.903 | 0.144 | -0.481 |
| Q05519   | 484  | 0.731 | 0.214 | -0.383 |
| P35579   | 1960 | 0.544 | 0.022 | -0.205 |
| Q16630-1 | 551  | 0.719 | 0.037 | -0.345 |
| P05305   | 212  | 0.443 | 0.065 | -0.287 |
| P26043   | 583  | 0.515 | 0.058 | -0.125 |
| P26038   | 577  | 0.51  | 0.045 | -0.095 |
| Q5VIY5   | 522  | 0.157 | 0.063 | -0.138 |
| Q9R0W0   | 84   | 0.56  | 0.066 | -0.178 |
| P15311   | 586  | 0.519 | 0.049 | -0.108 |
| Q9NWQ8   | 432  | 0.852 | 0.051 | -0.458 |
| P26043   | 583  | 0.515 | 0.058 | -0.125 |
| Q9R0W0   | 84   | 0.56  | 0.066 | -0.178 |
| Q05066   | 204  | 0.456 | 0.091 | -0.356 |
| P61981   | 247  | 0.328 | 0.006 | -0.042 |
| Q86WX3   | 136  | 0.882 | 0.195 | -0.505 |
| P38398   | 1863 | 0.583 | 0.014 | -0.325 |
| Q9NPI1   | 651  | 0.473 | 0.04  | -0.195 |
| Q5VTR2   | 975  | 0.547 | 0.073 | -0.319 |
| O75150   | 1001 | 0.616 | 0.018 | -0.381 |
| Q9BWC9   | 280  | 0.568 | 0.035 | -0.272 |
| Q8N726   | 132  | 0.689 | 0.035 | -0.247 |
| Q64364   | 169  | 0.716 | 0.051 | -0.214 |
| P38936   | 164  | 0.622 | 0.013 | -0.308 |
| Q9UER7   | 740  | 0.704 | 0.061 | -0.31  |
| P09429   | 215  | 0.744 | 0.252 | -0.46  |
| P20042   | 333  | 0.526 | 0.069 | -0.135 |
| Q9UNL4   | 249  | 0.333 | 0.004 | -0.158 |
| P46821   | 2468 | 0.718 | 0.061 | -0.332 |
| P56273   | 473  | 0.571 | 0.072 | -0.276 |
| Q8IZD2   | 1858 | 0.729 | 0.013 | -0.403 |
| Q99547   | 160  | 0.362 | 0.072 | -0.329 |
| P01106   | 439  | 0.608 | 0.002 | -0.351 |

|        |      |       |       |        |
|--------|------|-------|-------|--------|
| O60936 | 219  | 0.689 | 0.136 | -0.37  |
| P06748 | 294  | 0.588 | 0.115 | -0.189 |
| P19338 | 710  | 0.687 | 0.165 | -0.398 |
| Q9BTK6 | 254  | 1     | 0.204 | -0.534 |
| Q13526 | 163  | 0.571 | 0.023 | -0.417 |
| Q8N488 | 228  | 0.886 | 0.152 | -0.498 |
| P04271 | 92   | 0.337 | 0.039 | -0.157 |
| Q15424 | 915  | 0.937 | 0.188 | -0.491 |
| Q14151 | 953  | 0.887 | 0.154 | -0.472 |
| Q92922 | 1105 | 0.461 | 0.017 | -0.187 |
| Q9Y675 | 71   | 0.901 | 0.124 | -0.534 |
| P63165 | 101  | 0.307 | 0.066 | -0.199 |
| Q9NS56 | 1045 | 0.7   | 0.121 | -0.326 |
| Q12888 | 1972 | 0.785 | 0.026 | -0.38  |
| P62328 | 44   | 1     | 0.277 | -0.534 |
| Q9H9J4 | 1324 | 0.721 | 0.035 | -0.31  |
| Q9C0J8 | 1336 | 0.704 | 0.082 | -0.304 |
| Q8TBK6 | 192  | 0.677 | 0.091 | -0.295 |
| Q8TAQ5 | 688  | 0.128 | 0.101 | -0.305 |
| P17028 | 368  | 0.356 | 0.012 | -0.212 |
| Q13746 | 386  | 0.764 | 0.064 | -0.37  |
| Q14DJ8 | 832  | 0.716 | 0.011 | -0.353 |
| Q9PST7 | 573  | 0.281 | 0.106 | -0.026 |
| Q9C0J8 | 1336 | 0.704 | 0.082 | -0.304 |
| P62979 | 156  | 0.365 | 0.097 | -0.122 |
| P62987 | 128  | 0.219 | 0.061 | -0.012 |
| O75528 | 432  | 0.637 | 0.042 | -0.394 |
| P84040 | 103  | 0.515 | 0.071 | -0.033 |
| P02299 | 136  | 0.544 | 0.069 | -0.042 |
| O12161 | 101  | 0.822 | 0.206 | -0.391 |
| P03129 | 98   | 0.582 | 0.004 | -0.124 |
| Q05209 | 780  | 0.494 | 0.005 | -0.212 |
| Q15599 | 337  | 0.62  | 0.014 | -0.415 |
| Q9NQ29 | 371  | 0.558 | 0.205 | -0.316 |
| P01106 | 439  | 0.608 | 0.002 | -0.351 |
| P54257 | 671  | 0.557 | 0.023 | -0.317 |
| Q96RL1 | 719  | 0.673 | 0.043 | -0.391 |
| Q00987 | 491  | 0.601 | 0.057 | -0.261 |
| P01106 | 439  | 0.608 | 0.002 | -0.351 |
| P18101 | 128  | 0.234 | 0.055 | -0.019 |
| P55196 | 1824 | 0.524 | 0.013 | -0.172 |
| Q9ULX6 | 646  | 0.706 | 0.094 | -0.394 |
| P84996 | 626  | 0.899 | 0.043 | -0.517 |
| P55789 | 205  | 0.522 | 0.034 | -0.211 |

|        |      |       |       |        |
|--------|------|-------|-------|--------|
| P30533 | 357  | 0.392 | 0.027 | -0.284 |
| Q92688 | 251  | 0.506 | 0.359 | -0.181 |
| Q9BTT0 | 268  | 0.552 | 0.395 | -0.189 |
| Q9NRL2 | 1556 | 0.455 | 0.003 | -0.137 |
| Q9NWK9 | 470  | 0.264 | 0.003 | -0.151 |
| Q00994 | 111  | 0.919 | 0.148 | -0.521 |
| P62158 | 149  | 0.43  | 0.098 | -0.152 |
| Q86WR0 | 208  | 0.385 | 0.023 | -0.067 |
| P09496 | 248  | 0.661 | 0.054 | -0.348 |
| Q9BVG4 | 233  | 0.369 | 0.068 | -0.026 |
| Q9H501 | 851  | 0.67  | 0.161 | -0.36  |
| P50502 | 369  | 0.612 | 0.037 | -0.287 |
| Q96MY7 | 647  | 0.813 | 0.061 | -0.492 |
| P14136 | 432  | 0.488 | 0.003 | -0.342 |
| Q15651 | 99   | 1     | 0.365 | -0.534 |
| O60841 | 1220 | 0.531 | 0.087 | -0.137 |
| Q14919 | 205  | 0.688 | 0.081 | -0.319 |
| Q96SB3 | 815  | 0.698 | 0.042 | -0.416 |
| P07197 | 916  | 0.585 | 0.157 | -0.424 |
| P55209 | 391  | 0.368 | 0.166 | -0.138 |
| Q13438 | 667  | 0.49  | 0.069 | -0.231 |
| P40855 | 299  | 0.793 | 0.044 | -0.49  |
| Q8WXF1 | 523  | 0.65  | 0.01  | -0.3   |
| P20962 | 102  | 1     | 0.632 | -0.534 |
| Q9H6Z4 | 567  | 0.716 | 0.026 | -0.352 |
| Q8IUD2 | 1116 | 0.8   | 0.064 | -0.465 |
| Q86UR5 | 1692 | 0.668 | 0.056 | -0.292 |
| P62987 | 128  | 0.219 | 0.061 | -0.012 |
| P51991 | 378  | 0.606 | 0.06  | -0.264 |
| Q13464 | 1354 | 0.525 | 0.037 | -0.186 |
| Q96T23 | 1441 | 0.745 | 0.156 | -0.404 |
| P08621 | 437  | 0.78  | 0.342 | -0.408 |
| P05060 | 677  | 0.799 | 0.29  | -0.428 |
| Q9HC62 | 589  | 0.401 | 0.001 | -0.106 |
| Q13435 | 895  | 0.715 | 0.063 | -0.391 |
| Q92922 | 1105 | 0.461 | 0.017 | -0.187 |
| Q13573 | 536  | 0.513 | 0.122 | -0.256 |
| Q7KZ85 | 1726 | 0.321 | 0.063 | -0.005 |
| Q05519 | 484  | 0.731 | 0.214 | -0.383 |
| Q13243 | 272  | 0.632 | 0.283 | -0.249 |
| Q9NQ55 | 473  | 0.459 | 0.034 | -0.109 |
| O75683 | 361  | 0.925 | 0.281 | -0.528 |
| Q5VWG9 | 929  | 0.73  | 0.059 | -0.391 |
| Q6IPX3 | 200  | 1     | 0.328 | -0.534 |

|        |      |       |       |        |
|--------|------|-------|-------|--------|
| Q9UPQ9 | 1833 | 0.871 | 0.036 | -0.469 |
| P11387 | 765  | 0.442 | 0.175 | -0.154 |
| P12270 | 2363 | 0.815 | 0.086 | -0.503 |
| Q9H2G4 | 693  | 0.645 | 0.195 | -0.255 |
| P25490 | 414  | 0.551 | 0.019 | -0.307 |
| O60315 | 1214 | 0.53  | 0.042 | -0.311 |
| Q9H2Y7 | 1883 | 0.691 | 0.001 | -0.331 |
| Q15326 | 562  | 0.384 | 0.047 | -0.074 |
| P51814 | 821  | 0.173 | 0.06  | -0.076 |
| Q5RKT7 | 156  | 0.359 | 0.09  | -0.132 |
| Q8N6E6 | 398  | 0.857 | 0.15  | -0.474 |
| P11171 | 864  | 0.538 | 0.006 | -0.216 |
| Q9NY61 | 560  | 0.471 | 0.085 | -0.197 |
| Q9UEE9 | 299  | 0.806 | 0.188 | -0.496 |
| Q7Z3E2 | 898  | 0.682 | 0.075 | -0.419 |
| Q9HDC5 | 661  | 0.504 | 0.01  | -0.238 |
| P02545 | 664  | 0.738 | 0.005 | -0.421 |
| Q13526 | 163  | 0.571 | 0.023 | -0.417 |
| Q8NG27 | 643  | 0.782 | 0.083 | -0.358 |
| Q9BZL4 | 782  | 0.738 | 0.023 | -0.353 |
| Q8WXF1 | 523  | 0.65  | 0.01  | -0.3   |
| Q9H6Z4 | 567  | 0.716 | 0.026 | -0.352 |
| P36578 | 427  | 0.45  | 0.09  | -0.079 |
| Q86UC2 | 560  | 0.561 | 0.003 | -0.277 |
| P08621 | 437  | 0.78  | 0.342 | -0.408 |
| Q9BYW2 | 2564 | 0.649 | 0.045 | -0.392 |
| Q13573 | 536  | 0.513 | 0.122 | -0.256 |
| Q05066 | 204  | 0.456 | 0.091 | -0.356 |
| P06753 | 284  | 0.831 | 0.156 | -0.501 |
| P25490 | 414  | 0.551 | 0.019 | -0.307 |
| P08670 | 466  | 0.515 | 0.029 | -0.321 |
| O60315 | 1214 | 0.53  | 0.042 | -0.311 |
| Q15326 | 562  | 0.384 | 0.047 | -0.074 |
| Q86UD4 | 541  | 0.124 | 0.072 | -0.208 |
| Q8NFZ5 | 429  | 0.513 | 0.022 | -0.408 |
| Q16543 | 378  | 0.452 | 0.08  | -0.215 |
| Q02241 | 960  | 0.392 | 0.001 | -0.134 |
| Q92922 | 1105 | 0.461 | 0.017 | -0.187 |
| Q8TEW0 | 1356 | 0.607 | 0.024 | -0.294 |
| P09429 | 215  | 0.744 | 0.252 | -0.46  |
| Q96BK5 | 328  | 0.793 | 0.192 | -0.435 |
| O95990 | 144  | 0.799 | 0.169 | -0.471 |
| P40337 | 213  | 0.418 | 0.059 | -0.116 |
| P11171 | 864  | 0.538 | 0.006 | -0.216 |

|        |      |       |       |        |
|--------|------|-------|-------|--------|
| P01106 | 439  | 0.608 | 0.002 | -0.351 |
| P38936 | 164  | 0.622 | 0.013 | -0.308 |
| P54259 | 1190 | 0.886 | 0.007 | -0.5   |
| Q01844 | 656  | 0.907 | 0.102 | -0.477 |
| Q16630 | 551  | 0.719 | 0.037 | -0.345 |
| Q15637 | 639  | 0.786 | 0.003 | -0.439 |
| Q9BTC0 | 2240 | 0.814 | 0.034 | -0.407 |
| Q9BWA2 | 656  | 0.907 | 0.102 | -0.477 |

## INTERACTOME FOR 5HT-2C

|        |                                                          |
|--------|----------------------------------------------------------|
| P41595 | 5-hydroxytryptamine receptor 2B                          |
| P28223 | 5-hydroxytryptamine receptor 2A                          |
| P50148 | Guanine nucleotide-binding protein G(q) subunit alpha    |
| Q9UIS9 | Methyl-CpG-binding domain protein 1                      |
| Q99JA2 | Agouti-signaling protein                                 |
| P17752 | Tryptophan 5-hydroxylase 1                               |
| P30679 | Guanine nucleotide-binding protein subunit alpha-15      |
| P29992 | Guanine nucleotide-binding protein subunit alpha-11      |
| B1ALW3 | Guanine nucleotide binding protein (G protein), alpha 14 |
| Q00169 | Phosphatidylinositol transfer protein alpha isoform      |

## INTERACTOME FOR APC3

|        |                                                              |
|--------|--------------------------------------------------------------|
| Q13042 | Cell division cycle protein 16 homolog                       |
| Q9UJX2 | Cell division cycle protein 23 homolog                       |
| P27986 | Phosphatidylinositol 3-kinase regulatory subunit alpha       |
| P06241 | Tyrosine-protein kinase Fyn                                  |
| P62993 | Growth factor receptor-bound protein 2                       |
| A2A6Q5 | Cell division cycle protein 27 homolog                       |
| Q9BS18 | Anaphase-promoting complex subunit 13                        |
| Q96DE5 | Anaphase-promoting complex subunit 16                        |
| Q9UJX5 | Anaphase-promoting complex subunit 4                         |
| Q9UJX6 | Anaphase-promoting complex subunit 2                         |
| P00519 | Tyrosine-protein kinase ABL1                                 |
| P16333 | Cytoplasmic protein NCK1                                     |
| Q9UJX4 | Anaphase-promoting complex subunit 5                         |
| Q9H1A4 | Anaphase-promoting complex subunit 1                         |
| Q12834 | Cell division cycle protein 20 homolog                       |
| P12830 | Cadherin-1                                                   |
| Q8NHZ8 | Anaphase-promoting complex subunit CDC26                     |
| Q5NI33 | Ribonuclease II family protein                               |
| Q9CPV2 | Anaphase-promoting complex subunit 16                        |
| Q9UKT4 | F-box only protein 5                                         |
| Q9JJ66 | Cell division cycle protein 20 homolog                       |
| P51784 | Ubiquitin carboxyl-terminal hydrolase 11                     |
| P11440 | Cyclin-dependent kinase 1                                    |
| Q9Z1B5 | Mitotic spindle assembly checkpoint protein MAD2A            |
| Q9Z1S0 | Mitotic checkpoint serine/threonine-protein kinase BUB1 beta |
| Q96C86 | Scavenger mRNA-decapping enzyme DcpS                         |
| Q9H2P0 | Activity-dependent neuroprotector homeobox protein           |
| Q8VDQ8 | NAD-dependent deacetylase sirtuin-2                          |
| Q9UI95 | Mitotic spindle assembly checkpoint protein MAD2B            |
| Q9NS71 | Gastrokine-1                                                 |
| Q6NZQ4 | PAX-interacting protein 1                                    |
| Q9UJX3 | Anaphase-promoting complex subunit 7                         |
| Q9UM11 | Fizzy-related protein homolog                                |
| P60484 | PTEN                                                         |
| P31016 | Disks large homolog 4                                        |
| P51955 | Serine/threonine-protein kinase Nek2                         |
| Q99459 | Cell division cycle 5-like protein                           |
| Q13573 | SNW domain-containing protein 1                              |



## INTERACTOME FOR APC4

|        |                                                              |
|--------|--------------------------------------------------------------|
| Q9BS18 | Anaphase-promoting complex subunit 13                        |
| Q9UJX2 | Cell division cycle protein 23 homolog                       |
| Q13042 | Cell division cycle protein 16 homolog                       |
| Q96DE5 | Anaphase-promoting complex subunit 16                        |
| Q9UJX4 | Anaphase-promoting complex subunit 5                         |
| Q9H1A4 | Anaphase-promoting complex subunit 1                         |
| Q12834 | Cell division cycle protein 20 homolog                       |
| Q8NHZ8 | Anaphase-promoting complex subunit CDC26                     |
| P30260 | Cell division cycle protein 27 homolog                       |
| P11440 | Cyclin-dependent kinase 1                                    |
| Q9Z1B5 | Mitotic spindle assembly checkpoint protein MAD2A            |
| Q9Z1S0 | Mitotic checkpoint serine/threonine-protein kinase BUB1 beta |
| Q6NZQ4 | PAX-interacting protein 1                                    |
| Q8VDQ8 | NAD-dependent deacetylase sirtuin-2                          |
| P60484 | PTEN                                                         |

## INTERACTOME FOR APC5

|        |                                                              |
|--------|--------------------------------------------------------------|
| Q96DE5 | Anaphase-promoting complex subunit 16                        |
| Q9UJX2 | Cell division cycle protein 23 homolog                       |
| Q13042 | Cell division cycle protein 16 homolog                       |
| Q9UJX5 | Anaphase-promoting complex subunit 4                         |
| Q9BS18 | Anaphase-promoting complex subunit 13                        |
| O60566 | Mitotic checkpoint serine/threonine-protein kinase BUB1 beta |
| Q8NHZ8 | Anaphase-promoting complex subunit CDC26                     |
| Q9UJX6 | Anaphase-promoting complex subunit 2                         |
| O43684 | Mitotic checkpoint protein BUB3                              |
| Q9H1A4 | Anaphase-promoting complex subunit 1                         |
| P30260 | Cell division cycle protein 27 homolog                       |
| Q9UJX3 | Anaphase-promoting complex subunit 7                         |
| Q12834 | Cell division cycle protein 20 homolog                       |
| A0JLT2 | Mediator of RNA polymerase II transcription subunit 19       |
| Q9Z1B5 | Mitotic spindle assembly checkpoint protein MAD2A            |
| O14867 | Transcription regulator protein BACH1                        |
| Q92731 | Estrogen receptor beta                                       |
| Q6NZQ4 | PAX-interacting protein 1                                    |
| P60484 | PTEN                                                         |
| Q05516 | Zinc finger and BTB domain-containing protein 16             |

## INTERACTOME FOR APC7

|        |                                                              |
|--------|--------------------------------------------------------------|
| Q9BS18 | Anaphase-promoting complex subunit 13                        |
| Q96DE5 | Anaphase-promoting complex subunit 16                        |
| Q9UJX2 | Cell division cycle protein 23 homolog                       |
| Q13042 | Cell division cycle protein 16 homolog                       |
| Q9UJX4 | Anaphase-promoting complex subunit 5                         |
| P11440 | Cyclin-dependent kinase 1                                    |
| Q9H1A4 | Anaphase-promoting complex subunit 1                         |
| Q12834 | Cell division cycle protein 20 homolog                       |
| Q8NHZ8 | Anaphase-promoting complex subunit CDC26                     |
| Q92560 | Ubiquitin carboxyl-terminal hydrolase BAP1                   |
| Q9JJ66 | Cell division cycle protein 20 homolog                       |
| Q9Z1B5 | Mitotic spindle assembly checkpoint protein MAD2A            |
| O60566 | Mitotic checkpoint serine/threonine-protein kinase BUB1 beta |
| P60484 | PTEN                                                         |
| P30260 | Cell division cycle protein 27 homolog                       |
| Q99459 | Cell division cycle 5-like protein                           |

## INTERACTOME FOR AR

|        |                                                                |
|--------|----------------------------------------------------------------|
| Q9UBS8 | E3 ubiquitin-protein ligase RNF14                              |
| O43294 | Transforming growth factor beta-1-induced transcript 1 protein |
| Q99933 | BAG family molecular chaperone regulator 1                     |
| O95238 | SAM pointed domain-containing Ets transcription factor         |
| Q92993 | Histone acetyltransferase KAT5                                 |
| P49116 | Nuclear receptor subfamily 2 group C member 2                  |
| P63279 | SUMO-conjugating enzyme UBC9                                   |
| P38398 | BRCA1                                                          |
| Q05086 | Ubiquitin-protein ligase E3A                                   |
| P46406 | Glyceraldehyde-3-phosphate dehydrogenase                       |
| Q00987 | E3 ubiquitin-protein ligase Mdm2                               |
| P06396 | Gelsolin                                                       |
| P11308 | Transcriptional regulator ERG                                  |
| Q9Y252 | E3 ubiquitin-protein ligase RNF6                               |
| O88850 | Homeodomain-interacting protein kinase 3                       |
| P62826 | GTP-binding nuclear protein Ran                                |
| Q13772 | Nuclear receptor coactivator 4                                 |
| P82094 | TATA element modulatory factor                                 |
| P05412 | Transcription factor AP-1                                      |
| Q03135 | Caveolin-1                                                     |
| P35269 | General transcription factor IIF subunit 1                     |
| P24385 | G1/S-specific cyclin-D1                                        |
| P51946 | Cyclin-H                                                       |
| P50613 | Cyclin-dependent kinase 7                                      |
| P25491 | Mitochondrial protein import protein MAS5                      |
| Q15596 | Nuclear receptor coactivator 2                                 |
| Q9Y265 | RuvB-like 1                                                    |
| P21333 | Filamin-A                                                      |
| P07288 | Prostate-specific antigen                                      |
| P56524 | Histone deacetylase 4                                          |

|        |                                                                             |
|--------|-----------------------------------------------------------------------------|
| P07900 | Heat shock protein HSP 90-alpha                                             |
| Q92793 | CREB-binding protein                                                        |
| P63165 | Small ubiquitin-related modifier 1                                          |
| P10592 | Heat shock protein SSA2                                                     |
| Q15788 | Nuclear receptor coactivator 1                                              |
| Q15652 | Probable JmjC domain-containing histone demethylation protein 2C            |
| O95251 | Histone acetyltransferase KAT7                                              |
| P22202 | Heat shock protein SSA4                                                     |
| Q99497 | Protein DJ-1                                                                |
| Q14686 | Nuclear receptor coactivator 6                                              |
| Q16665 | Hypoxia-inducible factor 1-alpha                                            |
| P60709 | Actin, cytoplasmic 1                                                        |
| Q9R1E0 | Forkhead box protein O1                                                     |
| P00925 | Enolase 2                                                                   |
| P60010 | Actin                                                                       |
| O14672 | Disintegrin and metalloproteinase domain-containing protein 10              |
| Q06830 | Peroxiredoxin-1                                                             |
| P20711 | Aromatic-L-amino-acid decarboxylase                                         |
| O14976 | Cyclin-G-associated kinase                                                  |
| Q9UER7 | Death domain-associated protein 6                                           |
| Q9UQ80 | Proliferation-associated protein 2G4                                        |
| P35222 | Catenin beta-1                                                              |
| P10275 | Androgen Receptor                                                           |
| P15108 | ATP-dependent molecular chaperone HSC82                                     |
| P00359 | Glyceraldehyde-3-phosphate dehydrogenase 3                                  |
| P10591 | Heat shock protein SSA1                                                     |
| P02994 | Elongation factor 1-alpha                                                   |
| Q14192 | Four and a half LIM domains protein 2                                       |
| Q16666 | Gamma-interferon-inducible protein 16                                       |
| O96028 | Probable histone-lysine N-methyltransferase NSD2                            |
| O14595 | Carboxy-terminal domain RNA polymerase II polypeptide A small phosphatase 2 |
| P14921 | Protein C-ets-1                                                             |
| O89110 | Caspase-8                                                                   |

|        |                                                               |
|--------|---------------------------------------------------------------|
| Q04917 | 14-3-3 protein eta                                            |
| P04637 | p53                                                           |
| P19447 | TFIIH basal transcription factor complex helicase XPB subunit |
| Q15797 | SMAD1                                                         |
| Q9JLQ4 | Pleiomorphic adenoma gene-like 1                              |

## INTERACTOME FOR ARRB1

|        |                                             |
|--------|---------------------------------------------|
| P31946 | 14-3-3 protein beta/alpha                   |
| P62258 | 14-3-3 protein epsilon                      |
| Q04917 | 14-3-3 protein eta                          |
| P61981 | 14-3-3 protein gamma                        |
| P27348 | 14-3-3 protein theta                        |
| P63104 | 14-3-3 protein zeta/delta                   |
| P97288 | 5-hydroxytryptamine receptor 4              |
| Q13085 | Acetyl-CoA carboxylase 1                    |
| Q562R1 | Beta-actin-like protein 2                   |
| Q9BYX7 | Putative beta-actin-like protein 3          |
| P60709 | Actin, cytoplasmic 1 (Beta-actin)           |
| P68133 | Actin, alpha skeletal muscle                |
| P28332 | Alcohol dehydrogenase 6                     |
| P08588 | Beta-1 adrenergic receptor                  |
| P30556 | Type-1 angiotensin II receptor              |
| Q16352 | Alpha-internexin                            |
| P31750 | RAC-alpha serine/threonine-protein kinase   |
| O14744 | Protein arginine N-methyltransferase 5      |
| P07355 | Annexin A2                                  |
| O00203 | AP-3 complex subunit beta-1                 |
| O14617 | AP-3 complex subunit delta-1                |
| P51693 | Amyloid-like protein 1                      |
| O15511 | Actin-related protein 2/3 complex subunit 5 |
| P32121 | Beta-arrestin-2                             |
| P36575 | Arrestin-C                                  |
| P10523 | S-arrestin                                  |
| P25705 | ATP synthase subunit alpha, mitochondrial   |
| P06576 | ATP synthase subunit beta, mitochondrial    |
| Q13535 | Serine/threonine-protein kinase ATR         |
| O15169 | Axin-1                                      |
| Q9BYV9 | Transcription regulator protein BACH2       |
| Q99933 | BAG family molecular chaperone regulator 1  |
| Q9NYF8 | Bcl-2-associated transcription factor 1     |
| O35607 | Bone morphogenetic protein receptor type-2  |
| Q14137 | Ribosome biogenesis protein BOP1            |
| Q06187 | Tyrosine-protein kinase BTK                 |
| Q05682 | Caldesmon                                   |
| P62158 | Calmodulin                                  |
| P05814 | Beta-casein                                 |
| P15085 | Carboxypeptidase A1                         |
| Q16627 | C-C motif chemokine 14                      |
| P60953 | Cell division control protein 42 homolog    |

|        |                                                        |
|--------|--------------------------------------------------------|
| Q07065 | Cytoskeleton-associated protein 4                      |
| P09496 | Clathrin light chain A                                 |
| Q00610 | Clathrin heavy chain 1                                 |
| Q96DG6 | Carboxymethylenebutenolidase homolog                   |
| Q16281 | Cyclic nucleotide-gated cation channel alpha-3         |
| P23528 | Cofilin-1                                              |
| Q86YQ8 | Copine-8                                               |
| P68400 | Casein kinase II subunit alpha                         |
| Q96GQ7 | Probable ATP-dependent RNA helicase DDX27              |
| P52429 | Diacylglycerol kinase epsilon                          |
| P49619 | Diacylglycerol kinase gamma                            |
| Q86XP1 | Diacylglycerol kinase eta                              |
| Q13574 | Diacylglycerol kinase zeta                             |
| Q13268 | Dehydrogenase/reductase SDR family member 2            |
| O60832 | H/ACA ribonucleoprotein complex subunit 4              |
| P11532 | Dystrophin                                             |
| O54946 | DnaJ homolog subfamily B member 6                      |
| Q9C005 | Protein dpy-30 homolog                                 |
| Q8TD57 | Dynein heavy chain 3, axonemal                         |
| Q05193 | Dynamin-1                                              |
| P25101 | Endothelin-1 receptor                                  |
| Q05639 | Elongation factor 1-alpha 2                            |
| Q13347 | Eukaryotic translation initiation factor 3 subunit I   |
| Q16875 | 6-phosphofructo-2-kinase/fructose-2,6-bisphosphatase 3 |
| P49327 | Fatty acid synthase                                    |
| P21333 | Filamin-A                                              |
| Q13283 | Ras GTPase-activating protein-binding protein 1        |
| P06396 | Gelsolin                                               |
| P43220 | Glucagon-like peptide 1 receptor                       |
| Q14749 | Glycine N-methyltransferase                            |
| P98192 | Dihydroxyacetone phosphate acyltransferase             |
| P34947 | G protein-coupled receptor kinase 5                    |
| P38646 | Stress-70 protein, mitochondrial                       |
| P11021 | 78 kDa glucose-regulated protein                       |
| P16403 | Histone H1.2                                           |
| Q92522 | Histone H1x                                            |
| P0C0S8 | Histone H2A type 1                                     |
| Q8IUE6 | Histone H2A type 2-B                                   |
| P16104 | Histone H2A.x                                          |
| P23527 | Histone H2B type 1-O                                   |
| P84243 | Histone H3.3                                           |
| P62805 | Histone H4                                             |
| O35387 | HCLS1-associated protein X-1                           |
| Q7Z4V5 | Hepatoma-derived growth factor-related protein 2       |
| P31943 | Heterogeneous nuclear ribonucleoprotein H              |



|        |                                                              |
|--------|--------------------------------------------------------------|
| P61978 | Heterogeneous nuclear ribonucleoprotein K                    |
| P52272 | Heterogeneous nuclear ribonucleoprotein M                    |
| Q00839 | Heterogeneous nuclear ribonucleoprotein U                    |
| P07900 | Heat shock protein HSP 90-alpha                              |
| P08107 | Heat shock 70 kDa protein 1A/1B                              |
| P48741 | Putative heat shock 70 kDa protein 7                         |
| P11142 | Heat shock cognate 71 kDa protein                            |
| Q9Y6M1 | Insulin-like growth factor 2 mRNA-binding protein 2          |
| P23588 | Eukaryotic translation initiation factor 4B                  |
| P25963 | NF-kappa-B inhibitor alpha                                   |
| O00505 | Importin subunit alpha-3                                     |
| P05412 | Transcription factor AP-1                                    |
| Q9Y597 | BTB/POZ domain-containing protein KCTD3                      |
| P50053 | Ketohexokinase                                               |
| Q9ULI4 | Kinesin-like protein KIF26A                                  |
| Q99661 | Kinesin-like protein KIF2C                                   |
| Q9Y496 | Kinesin-like protein KIF3A                                   |
| P14618 | Pyruvate kinase isozymes M1/M2                               |
| Q86UP2 | Kinectin                                                     |
| P42166 | Lamina-associated polypeptide 2, isoform alpha               |
| Q81LR7 | Elongation factor 4                                          |
| Q9UHB6 | LIM domain and actin-binding protein 1                       |
| Q9NZR2 | Low-density lipoprotein receptor-related protein 1B          |
| O75096 | Low-density lipoprotein receptor-related protein 4           |
| Q13233 | Mitogen-activated protein kinase kinase kinase 1             |
| Q99683 | Mitogen-activated protein kinase kinase kinase 5             |
| P46821 | Microtubule-associated protein 1B                            |
| Q00987 | E3 ubiquitin-protein ligase Mdm2                             |
| Q9BQA1 | Methylosome protein 50                                       |
| P45984 | Mitogen-activated protein kinase 9                           |
| P53779 | Mitogen-activated protein kinase 10                          |
| O14950 | Myosin regulatory light chain 12B                            |
| P45985 | Dual specificity mitogen-activated protein kinase kinase 4   |
| Q6WCQ1 | Myosin phosphatase Rho-interacting protein                   |
| P04731 | Metallothionein-1A                                           |
| Q9R0L9 | Sialomucin core protein 24                                   |
| P12882 | Myosin-1                                                     |
| P35579 | Myosin-9                                                     |
| P60660 | Myosin light polypeptide 6                                   |
| O00159 | Unconventional myosin-Ic                                     |
| Q9QY36 | N-alpha-acetyltransferase 10                                 |
| P28331 | NADH-ubiquinone oxidoreductase 75 kDa subunit, mitochondrial |
| Q9HC98 | Serine/threonine-protein kinase Nek6                         |
| Q60795 | Nuclear factor erythroid 2-related factor 2                  |
| Q14978 | Nucleolar and coiled-body phosphoprotein 1                   |

|        |                                                                              |
|--------|------------------------------------------------------------------------------|
| Q9NPE3 | H/ACA ribonucleoprotein complex subunit 3                                    |
| P06748 | Nucleophosmin                                                                |
| P19338 | Nucleolin                                                                    |
| O00443 | Phosphatidylinositol 4-phosphate 3-kinase C2 domain-containing subunit alpha |
| O00459 | Phosphatidylinositol 3-kinase regulatory subunit beta                        |
| P07237 | Protein disulfide-isomerase (PDI)                                            |
| O00541 | Pescadillo homolog                                                           |
| Q53H76 | Phospholipase A1 member A                                                    |
| P62937 | Peptidyl-prolyl cis-trans isomerase A                                        |
| P35813 | Protein phosphatase 1A                                                       |
| O75688 | Protein phosphatase 1B                                                       |
| Q13523 | Serine/threonine-protein kinase PRP4 homolog                                 |
| Q9Y6C5 | Protein patched homolog 2                                                    |
| P62820 | Ras-related protein Rab-1A                                                   |
| Q96S59 | Ran-binding protein 9                                                        |
| P98175 | RNA-binding protein 10                                                       |
| Q9BXF6 | Rab11 family-interacting protein 5                                           |
| P49796 | Regulator of G-protein signaling 3                                           |
| A7KAX9 | Rho GTPase-activating protein 32                                             |
| P61313 | 60S ribosomal protein L15                                                    |
| P35268 | 60S ribosomal protein L22                                                    |
| P39023 | 60S ribosomal protein L3                                                     |
| P62424 | 60S ribosomal protein L7a                                                    |
| Q6DKI1 | 60S ribosomal protein L7-like 1                                              |
| P09651 | Heterogeneous nuclear ribonucleoprotein A1                                   |
| P51991 | Heterogeneous nuclear ribonucleoprotein A3                                   |
| Q13464 | Rho-associated protein kinase 1                                              |
| O95602 | DNA-directed RNA polymerase I subunit RPA1                                   |
| O15446 | DNA-directed RNA polymerase I subunit RPA34                                  |
| Q9GZS1 | DNA-directed RNA polymerase I subunit RPA49                                  |
| P19388 | DNA-directed RNA polymerases I, II, and III subunit RPABC1                   |
| O15160 | DNA-directed RNA polymerases I and III subunit RPAC1                         |
| P08708 | 40S ribosomal protein S17                                                    |
| P15880 | 40S ribosomal protein S2                                                     |
| P61247 | 40S ribosomal protein S3a                                                    |
| P62241 | 40S ribosomal protein S8                                                     |
| Q92541 | RNA polymerase-associated protein RTF1 homolog                               |
| Q9ES97 | Reticulon-3                                                                  |
| Q6P3W7 | SCY1-like protein 2                                                          |
| O75056 | Syndecan-3                                                                   |
| Q13435 | Splicing factor 3B subunit 2                                                 |
| P62314 | Small nuclear ribonucleoprotein Sm D1                                        |
| Q9QX47 | Protein SON                                                                  |
| Q9Y657 | Spindlin-1                                                                   |
| Q13813 | Spectrin alpha chain, brain                                                  |

|        |                                                           |
|--------|-----------------------------------------------------------|
| Q12772 | Sterol regulatory element-binding protein 2               |
| Q14247 | Src substrate cortactin                                   |
| P12931 | Proto-oncogene tyrosine-protein kinase Src                |
| Q9UQ35 | Serine/arginine repetitive matrix protein 2               |
| Q9Y2H1 | Serine/threonine-protein kinase 38-like                   |
| Q15208 | Serine/threonine-protein kinase 38                        |
| Q5T5C0 | Syntaxin-binding protein 5                                |
| Q9BQE3 | Tubulin alpha-1C chain                                    |
| Q13748 | Tubulin alpha-3C/D chain                                  |
| P68366 | Tubulin alpha-4A chain                                    |
| Q13885 | Tubulin beta-2A chain                                     |
| P07437 | Tubulin beta chain                                        |
| Q13428 | Treacle protein                                           |
| Q86V81 | THO complex subunit 4                                     |
| Q8WZ42 | Titin                                                     |
| Q9NYL9 | Tropomodulin-3                                            |
| Q01320 | DNA topoisomerase 2-alpha                                 |
| P67936 | Tropomyosin alpha-4 chain                                 |
| Q9Y2W1 | Thyroid hormone receptor-associated protein 3             |
| Q9Y4K3 | TNF receptor-associated factor 6                          |
| P25490 | Transcriptional repressor protein YY1                     |
| Q9UPU5 | Ubiquitin carboxyl-terminal hydrolase 24                  |
| Q00341 | Vigilin                                                   |
| P08670 | Vimentin                                                  |
| P20152 | Vimentin                                                  |
| P13010 | X-ray repair cross-complementing protein 5                |
| P67809 | Nuclease-sensitive element-binding protein 1              |
| P07947 | Tyrosine-protein kinase Yes                               |
| O43298 | Zinc finger and BTB domain-containing protein 43          |
| O95218 | Zinc finger Ran-binding domain-containing protein 2       |
| Q15942 | Zyxin (Zyxin-2)                                           |
| Q3MIH3 | Ubiquitin A-52 residue ribosomal protein fusion product 1 |
| Q5U5U6 | Ubiquitin B                                               |
| Q5JU97 | Zinc finger and BTB domain containing 43                  |
| Q5RKT7 | Ribosomal protein S27a                                    |
| Q5UGI3 | Ubiquitin C splice variant                                |
| Q8TBK5 | 60S ribosomal protein L6                                  |
| Q7Z3R3 | Putative uncharacterized protein DKFZp686J1593            |
| Q5NET8 | ATp-dependent helicase                                    |
| Q5NGW2 | Chitinase family 18 protein                               |
| Q8R542 | Matrilin-2                                                |

## INTERACTOME FOR ARRB2

|        |                                                            |
|--------|------------------------------------------------------------|
| P25101 | Endothelin-1 receptor                                      |
| P12931 | Proto-oncogene tyrosine-protein kinase Src                 |
| Q08499 | cAMP-specific 3',5'-cyclic phosphodiesterase 4D            |
| Q9Y4K3 | TNF receptor-associated factor 6                           |
| P49407 | Beta-arrestin-1                                            |
| Q96GQ7 | Probable ATP-dependent RNA helicase DDX27                  |
| Q13428 | Treacle protein                                            |
| O00541 | Pescadillo homolog                                         |
| Q6DKI1 | 60S ribosomal protein L7-like 1                            |
| P51148 | Ras-related protein Rab-5C                                 |
| Q8N983 | 39S ribosomal protein L43, mitochondrial                   |
| O00203 | AP-3 complex subunit beta-1                                |
| Q14137 | Ribosome biogenesis protein BOP1                           |
| P53779 | Mitogen-activated protein kinase 10                        |
| P08588 | Beta-1 adrenergic receptor                                 |
| O00505 | Importin subunit alpha-3                                   |
| Q14978 | Nucleolar and coiled-body phosphoprotein 1                 |
| P22087 | rRNA 2'-O-methyltransferase fibrillarin                    |
| O00629 | Importin subunit alpha-4                                   |
| Q99683 | Mitogen-activated protein kinase kinase kinase 5           |
| Q9H9J2 | 39S ribosomal protein L44, mitochondrial                   |
| P32121 | Beta-arrestin-2                                            |
| P45985 | Dual specificity mitogen-activated protein kinase kinase 4 |
| Q92522 | Histone H1x                                                |
| Q02539 | Histone H1.1                                               |
| Q9NYL9 | Tropomodulin-3                                             |
| O43719 | HIV Tat-specific factor 1                                  |
| P30414 | NK-tumor recognition protein                               |
| Q9BPX5 | Actin-related protein 2/3 complex subunit 5-like protein   |

|         |                                                            |
|---------|------------------------------------------------------------|
| Q14247  | Src substrate cortactin                                    |
| P34931  | Heat shock 70 kDa protein 1-like                           |
| P84090  | Enhancer of rudimentary homolog                            |
| P55209  | Nucleosome assembly protein 1-like 1                       |
| Q562R1  | Beta-actin-like protein 2                                  |
| Q9BYX7  | Putative beta-actin-like protein 3                         |
| P81605  | Dermcidin                                                  |
| Q8TBK5  | 60S ribosomal protein L6                                   |
| Q9NPE3  | H/ACA ribonucleoprotein complex subunit 3                  |
| Q9BUA3  | Uncharacterized protein C11orf84                           |
| Q9H3K6  | BolA-like protein 2                                        |
| Q9NQ92  | Cooperator of PRMT5                                        |
| Q9UL80  | Myosin-reactive immunoglobulin light chain variable region |
| Q5RKT7  | Ribosomal protein S27a                                     |
| Q3MIH3  | Ubiquitin A-52 residue ribosomal protein fusion product 1  |
| Q3B726  | Q3B726                                                     |
| P09497  | Clathrin light chain B                                     |
| IGKV1-5 | Ig kappa chain V-I region HK102                            |
| Q8IUE6  | Histone H2A type 2-B                                       |
| Q16643  | Drebrin                                                    |
| Q5UGI3  | Ubiquitin C splice variant                                 |
| P23527  | Histone H2B type 1-O                                       |
| P46821  | Microtubule-associated protein 1B                          |
| P27348  | 14-3-3 protein theta                                       |
| Q7Z4V5  | Hepatoma-derived growth factor-related protein 2           |
| Q5JUX0  | Spindlin-3                                                 |
| O75056  | Syndecan-3                                                 |
| Q8N752  | Casein kinase I isoform alpha-like                         |
| Q9Y657  | Spindlin-1                                                 |
| Q86VZ4  | Low-density lipoprotein receptor-related protein 11        |
| P17066  | Heat shock 70 kDa protein 6                                |
| O00567  | Nucleolar protein 56                                       |
| Q5U5U6  | Ubiquitin B                                                |

|        |                                                                      |
|--------|----------------------------------------------------------------------|
| Q8WVC0 | RNA polymerase-associated protein LEO1                               |
| O76061 | Stanniocalcin-2                                                      |
| P35813 | Protein phosphatase 1A                                               |
| P35580 | Myosin-10                                                            |
| Q9H9Y6 | DNA-directed RNA polymerase I subunit RPA2                           |
| P16403 | Histone H1.2                                                         |
| P05814 | Beta-casein                                                          |
| Q5NHX5 | Phosphatidate cytidyltransferase                                     |
| Q96G25 | Mediator of RNA polymerase II transcription subunit 8                |
| Q07021 | Complement component 1 Q subcomponent-binding protein, mitochondrial |
| P98175 | RNA-binding protein 10                                               |
| P11021 | 78 kDa glucose-regulated protein                                     |
| Q13813 | Spectrin alpha chain, brain                                          |
| P67809 | Nuclease-sensitive element-binding protein 1                         |
| P19338 | Nucleolin                                                            |
| O95071 | E3 ubiquitin-protein ligase UBR5                                     |
| Q6P3W7 | SCY1-like protein 2                                                  |
| Q5T5U3 | Rho GTPase-activating protein 21                                     |
| P54105 | Methylosome subunit pICln                                            |
| P30050 | 60S ribosomal protein L12                                            |
| P60660 | Myosin light polypeptide 6                                           |
| P23588 | Eukaryotic translation initiation factor 4B                          |
| O75688 | Protein phosphatase 1B                                               |
| P09651 | Heterogeneous nuclear ribonucleoprotein A1                           |
| Q05639 | Elongation factor 1-alpha 2                                          |
| P35268 | 60S ribosomal protein L22                                            |
| Q9H361 | Polyadenylate-binding protein 3                                      |
| Q15750 | TGF-beta-activated kinase 1 and MAP3K7-binding protein 1             |
| Q99829 | Copine-1                                                             |
| P61978 | Heterogeneous nuclear ribonucleoprotein K                            |
| Q12906 | Interleukin enhancer-binding factor 3                                |
| P46778 | 60S ribosomal protein L21                                            |
| Q9BXF6 | Rab11 family-interacting protein 5                                   |

|        |                                                           |
|--------|-----------------------------------------------------------|
| O75533 | Splicing factor 3B subunit 1                              |
| Q9BQE3 | Tubulin alpha-1C chain                                    |
| Q15208 | Serine/threonine-protein kinase 38                        |
| P63267 | Actin, gamma-enteric smooth muscle                        |
| Q15393 | Splicing factor 3B subunit 3                              |
| Q9NZI8 | Insulin-like growth factor 2 mRNA-binding protein 1       |
| O95602 | DNA-directed RNA polymerase I subunit RPA1                |
| Q01082 | Spectrin beta chain, brain 1                              |
| Q13310 | Polyadenylate-binding protein 4                           |
| P05388 | 60S acidic ribosomal protein P0                           |
| Q04917 | 14-3-3 protein eta                                        |
| Q9H7D7 | WD repeat-containing protein 26                           |
| P08670 | Vimentin                                                  |
| Q99873 | Protein arginine N-methyltransferase 1                    |
| P07355 | Annexin A2                                                |
| P39023 | 60S ribosomal protein L3                                  |
| Q9NYF8 | Bcl-2-associated transcription factor 1                   |
| P13639 | Elongation factor 2                                       |
| O00299 | Chloride intracellular channel protein 1                  |
| P04406 | Glyceraldehyde-3-phosphate dehydrogenase                  |
| Q13574 | Diacylglycerol kinase zeta                                |
| Q86V81 | THO complex subunit 4                                     |
| O60832 | H/ACA ribonucleoprotein complex subunit 4                 |
| P14618 | Pyruvate kinase isozymes M1/M2                            |
| P23396 | 40S ribosomal protein S3                                  |
| P31946 | 14-3-3 protein beta/alpha                                 |
| Q14722 | Voltage-gated potassium channel subunit beta-1            |
| P07910 | Heterogeneous nuclear ribonucleoproteins C1/C2            |
| Q96QK1 | Vacuolar protein sorting-associated protein 35            |
| P46060 | Ran GTPase-activating protein 1                           |
| P52429 | Diacylglycerol kinase epsilon                             |
| P25205 | DNA replication licensing factor MCM3                     |
| Q9P2K8 | Eukaryotic translation initiation factor 2-alpha kinase 4 |

|        |                                                                    |
|--------|--------------------------------------------------------------------|
| P46779 | 60S ribosomal protein L28                                          |
| P68366 | Tubulin alpha-4A chain                                             |
| O14617 | AP-3 complex subunit delta-1                                       |
| O43390 | Heterogeneous nuclear ribonucleoprotein R                          |
| P35221 | Catenin alpha-1                                                    |
| P07384 | Calpain-1 catalytic subunit                                        |
| P52907 | F-actin-capping protein subunit alpha-1                            |
| Q9Y2W1 | Thyroid hormone receptor-associated protein 3                      |
| P62258 | 14-3-3 protein epsilon                                             |
| O43143 | Putative pre-mRNA-splicing factor ATP-dependent RNA helicase DHX15 |
| Q15233 | Non-POU domain-containing octamer-binding protein                  |
| P61313 | 60S ribosomal protein L15                                          |
| O00159 | Unconventional myosin-Ic                                           |
| P04350 | Tubulin beta-4A chain                                              |
| P36575 | Arrestin-C                                                         |
| Q15029 | 116 kDa U5 small nuclear ribonucleoprotein component               |
| P61981 | 14-3-3 protein gamma                                               |
| P08708 | 40S ribosomal protein S17                                          |
| P31943 | Heterogeneous nuclear ribonucleoprotein H                          |
| Q92499 | ATP-dependent RNA helicase DDX1                                    |
| P40227 | T-complex protein 1 subunit zeta                                   |
| Q13557 | Calcium/calmodulin-dependent protein kinase type II subunit delta  |
| Q9NY65 | Tubulin alpha-8 chain                                              |
| P16989 | DNA-binding protein A                                              |
| P11940 | Polyadenylate-binding protein 1                                    |
| P62277 | 40S ribosomal protein S13                                          |
| P23246 | Splicing factor, proline- and glutamine-rich                       |
| P52272 | Heterogeneous nuclear ribonucleoprotein M                          |
| O60716 | Catenin delta-1                                                    |
| P55795 | Heterogeneous nuclear ribonucleoprotein H2                         |
| P50914 | 60S ribosomal protein L14                                          |
| P62424 | 60S ribosomal protein L7a                                          |
| P11142 | Heat shock cognate 71 kDa protein                                  |



|        |                                                                          |
|--------|--------------------------------------------------------------------------|
| P04844 | Dolichyl-diphosphooligosaccharide--protein glycosyltransferase subunit 2 |
| Q00526 | Cyclin-dependent kinase 3                                                |
| P18124 | 60S ribosomal protein L7                                                 |
| P61247 | 40S ribosomal protein S3a                                                |
| Q07020 | 60S ribosomal protein L18                                                |
| Q14103 | Heterogeneous nuclear ribonucleoprotein D0                               |
| P08238 | Heat shock protein HSP 90-beta                                           |
| Q13885 | Tubulin beta-2A chain                                                    |
| P47755 | F-actin-capping protein subunit alpha-2                                  |
| P35579 | Myosin-9                                                                 |
| P52597 | Heterogeneous nuclear ribonucleoprotein F                                |
| O14744 | Protein arginine N-methyltransferase 5                                   |
| P62316 | Small nuclear ribonucleoprotein Sm D2                                    |
| Q13509 | Tubulin beta-3 chain                                                     |
| P17812 | CTP synthase 1                                                           |
| Q71U36 | Tubulin alpha-1A chain                                                   |
| Q13748 | Tubulin alpha-3C/D chain                                                 |
| P09496 | Clathrin light chain A                                                   |
| P60709 | Actin, cytoplasmic 1                                                     |
| P39019 | 40S ribosomal protein S19                                                |
| P05387 | 60S acidic ribosomal protein P2                                          |
| P07237 | Protein disulfide-isomerase                                              |
| P31040 | Succinate dehydrogenase [ubiquinone] flavoprotein subunit, mitochondrial |
| Q9UHB6 | LIM domain and actin-binding protein 1                                   |
| P05386 | 60S acidic ribosomal protein P1                                          |
| C2orf6 | MOB kinase activator 1A                                                  |
| Q15052 | Rho guanine nucleotide exchange factor 6                                 |
| Q8NC51 | Plasminogen activator inhibitor 1 RNA-binding protein                    |
| Q13151 | Heterogeneous nuclear ribonucleoprotein A0                               |
| Q00839 | Heterogeneous nuclear ribonucleoprotein U                                |
| Q14739 | Lamin-B receptor                                                         |
| Q13263 | Transcription intermediary factor 1-beta                                 |
| Q16875 | 6-phosphofructo-2-kinase/fructose-2,6-bisphosphatase 3                   |

|        |                                                                |
|--------|----------------------------------------------------------------|
| P06396 | Gelsolin                                                       |
| P62241 | 40S ribosomal protein S8                                       |
| P62081 | 40S ribosomal protein S7                                       |
| P26599 | Polypyrimidine tract-binding protein 1                         |
| P62899 | 60S ribosomal protein L31                                      |
| P10523 | S-arrestin                                                     |
| O00571 | ATP-dependent RNA helicase DDX3X                               |
| P41227 | N-alpha-acetyltransferase 10                                   |
| O95218 | Zinc finger Ran-binding domain-containing protein 2            |
| P62314 | Small nuclear ribonucleoprotein Sm D1                          |
| Q9UQ35 | Serine/arginine repetitive matrix protein 2                    |
| P68371 | Tubulin beta-4B chain                                          |
| P62753 | 40S ribosomal protein S6                                       |
| P23528 | Cofilin-1                                                      |
| P08107 | Heat shock 70 kDa protein 1A/1B                                |
| Q9UN86 | Ras GTPase-activating protein-binding protein 2                |
| O14974 | Protein phosphatase 1 regulatory subunit 12A                   |
| Q14204 | Cytoplasmic dynein 1 heavy chain 1                             |
| Q9BQA1 | Methylosome protein 50                                         |
| Q14004 | Cyclin-dependent kinase 13                                     |
| Q13435 | Splicing factor 3B subunit 2                                   |
| P84098 | 60S ribosomal protein L19                                      |
| Q93034 | Cullin-5                                                       |
| P30291 | Wee1-like protein kinase                                       |
| P62888 | 60S ribosomal protein L30                                      |
| Q13367 | AP-3 complex subunit beta-2                                    |
| P62701 | 40S ribosomal protein S4, X isoform                            |
| Q9P286 | Serine/threonine-protein kinase PAK 7                          |
| Q08J23 | tRNA (cytosine(34)-C(5))-methyltransferase                     |
| P36578 | 60S ribosomal protein L4                                       |
| P18077 | 60S ribosomal protein L35a                                     |
| P46019 | Phosphorylase b kinase regulatory subunit alpha, liver isoform |
| Q9NZN5 | Rho guanine nucleotide exchange factor 12                      |

|        |                                                                                   |
|--------|-----------------------------------------------------------------------------------|
| P49454 | Centromere protein F                                                              |
| P68104 | Elongation factor 1-alpha 1                                                       |
| P16104 | Histone H2A.x                                                                     |
| P27694 | Replication protein A 70 kDa DNA-binding subunit                                  |
| Q9Y2J2 | Band 4.1-like protein 3                                                           |
| O00443 | Phosphatidylinositol 4-phosphate 3-kinase C2 domain-containing subunit alpha      |
| P78362 | SRSF protein kinase 2                                                             |
| P61254 | 60S ribosomal protein L26                                                         |
| P55072 | Transitional endoplasmic reticulum ATPase                                         |
| P42766 | 60S ribosomal protein L35                                                         |
| P19388 | DNA-directed RNA polymerases I, II, and III subunit RPABC1                        |
| P55196 | Afadin                                                                            |
| O15160 | DNA-directed RNA polymerases I and III subunit RPAC1                              |
| P11802 | Cyclin-dependent kinase 4                                                         |
| Q14974 | Importin subunit beta-1                                                           |
| P68032 | Actin, alpha cardiac muscle 1                                                     |
| Q99558 | Mitogen-activated protein kinase kinase kinase 14                                 |
| Q68EM7 | Rho GTPase-activating protein 17                                                  |
| P42166 | Lamina-associated polypeptide 2, isoform alpha                                    |
| P17844 | Probable ATP-dependent RNA helicase DDX5                                          |
| P21333 | Filamin-A                                                                         |
| O15111 | Inhibitor of nuclear factor kappa-B kinase subunit alpha                          |
| P49327 | Fatty acid synthase                                                               |
| Q9HBA0 | Transient receptor potential cation channel subfamily V member 4                  |
| P12956 | X-ray repair cross-complementing protein 6                                        |
| P68400 | Casein kinase II subunit alpha                                                    |
| P06748 | Nucleophosmin                                                                     |
| P62158 | Calmodulin                                                                        |
| P13010 | X-ray repair cross-complementing protein 5                                        |
| O95782 | AP-2 complex subunit alpha-1                                                      |
| P30153 | Serine/threonine-protein phosphatase 2A 65 kDa regulatory subunit A alpha isoform |
| Q92769 | Histone deacetylase 2                                                             |
| P62937 | Peptidyl-prolyl cis-trans isomerase A                                             |

|          |                                                                                  |
|----------|----------------------------------------------------------------------------------|
| O94973   | AP-2 complex subunit alpha-2                                                     |
| O43318   | Mitogen-activated protein kinase kinase kinase 7                                 |
| P42224   | Signal transducer and activator of transcription 1-alpha/beta                    |
| P62913   | 60S ribosomal protein L11                                                        |
| Q8IZQ8   | Myocardin                                                                        |
| Q13523   | Serine/threonine-protein kinase PRP4 homolog                                     |
| O15085   | Rho guanine nucleotide exchange factor 11                                        |
| Q13233   | Mitogen-activated protein kinase kinase kinase 1                                 |
| Q9UPA5   | Protein bassoon                                                                  |
| Q9Y3U8   | 60S ribosomal protein L36                                                        |
| S100A9   | Protein S100-A9                                                                  |
| Q5NGD0   | Isoleucine--tRNA ligase                                                          |
| Q8TAQ2   | SWI/SNF complex subunit SMARCC2                                                  |
| Q6ZWR4   | Serine/threonine-protein phosphatase 2A 55 kDa regulatory subunit B beta isoform |
| P45984   | Mitogen-activated protein kinase 9                                               |
| P28482   | Mitogen-activated protein kinase 1                                               |
| P63010   | AP-2 complex subunit beta                                                        |
| O75251   | NADH dehydrogenase [ubiquinone] iron-sulfur protein 7, mitochondrial             |
| P50613   | Cyclin-dependent kinase 7                                                        |
| P31750   | RAC-alpha serine/threonine-protein kinase                                        |
| Q9WV60   | Glycogen synthase kinase-3 beta                                                  |
| P60953   | Cell division control protein 42 homolog                                         |
| Q00987   | E3 ubiquitin-protein ligase Mdm2                                                 |
| P97288   | 5-hydroxytryptamine receptor 4                                                   |
| P40417   | Mitogen-activated protein kinase ERK-A                                           |
| Q08499-2 | cAMP-specific 3',5'-cyclic phosphodiesterase 4D                                  |
| Q9H422   | Homeodomain-interacting protein kinase 3                                         |
| P26769   | Adenylate cyclase type 2                                                         |
| Q9HBX9   | Relaxin receptor 1                                                               |

## INTERACTOME FOR BMI1

|        |                                          |
|--------|------------------------------------------|
| P63279 | SUMO-conjugating enzyme UBC9             |
| Q8VDS3 | Chromobox protein homolog 7              |
| O14508 | Suppressor of cytokine signaling 2       |
| P30658 | Chromobox protein homolog 2              |
| Q9HC52 | Chromobox protein homolog 8              |
| O95503 | Chromobox protein homolog 6              |
| P67870 | Casein kinase II subunit beta            |
| Q06587 | E3 ubiquitin-protein ligase RING1        |
| Q99496 | E3 ubiquitin-protein ligase RING2        |
| Q8IXK0 | Polyhomeotic-like protein 2              |
| P78364 | Polyhomeotic-like protein 1              |
| Q8NDX5 | Polyhomeotic-like protein 3              |
| P68400 | Casein kinase II subunit alpha           |
| O00257 | E3 SUMO-protein ligase CBX4              |
| Q8IY57 | YY1-associated factor 2                  |
| O75461 | Transcription factor E2F6                |
| P51784 | Ubiquitin carboxyl-terminal hydrolase 11 |
| P0CG48 | Polyubiquitin-C                          |
| Q93009 | Ubiquitin carboxyl-terminal hydrolase 7  |
| P60484 | PTEN                                     |
| Q9ULT8 | E3 ubiquitin-protein ligase HECTD1       |
| Q8N488 | RING1 and YY1-binding protein            |
| P62805 | Histone H4                               |
| O76075 | DNA fragmentation factor subunit beta    |
| P62258 | 14-3-3 protein epsilon                   |

## INTERACTOME FOR CAVEOLIN

|        |                                                                |
|--------|----------------------------------------------------------------|
| P10275 | Androgen receptor                                              |
| P35354 | Prostaglandin G/H synthase 2                                   |
| Q13586 | Stromal interaction molecule 1                                 |
| P01876 | Ig alpha-1 chain C region                                      |
| Q9H1Q7 | Protein FAM113A                                                |
| P20264 | POU domain, class 3, transcription factor 3                    |
| P01834 | Ig kappa chain C region                                        |
| Q9UGM3 | Deleted in malignant brain tumors 1 protein                    |
| Q96JH8 | Ras-associating and dilute domain-containing protein           |
| O00194 | Ras-related protein Rab-27B                                    |
| Q8NFW9 | Rab effector MyRIP                                             |
| P13861 | cAMP-dependent protein kinase type II-alpha regulatory subunit |
| P48995 | Short transient receptor potential channel 1                   |
| Q15843 | NEDD8                                                          |
| P61081 | NEDD8-conjugating enzyme Ubc12                                 |
| P11021 | 78 kDa glucose-regulated protein                               |
| P22307 | Non-specific lipid-transfer protein                            |
| O75955 | Flotillin-1                                                    |
| Q8ZAQ2 | Phosphomethylpyrimidine synthase                               |
| P41134 | DNA-binding protein inhibitor ID-1                             |
| P25116 | Proteinase-activated receptor 1                                |
| Q7CL81 | PTS system enzyme IIBC                                         |
| P25445 | Tumor necrosis factor receptor superfamily member 6            |
| Q9UNN8 | Endothelial protein C receptor                                 |
| P13987 | CD59 glycoprotein                                              |
| P55957 | BH3-interacting domain death agonist                           |
| P49755 | Transmembrane emp24 domain-containing protein 10               |
| Q15363 | Transmembrane emp24 domain-containing protein 2                |
| Q14254 | Flotillin-2                                                    |
| P51636 | Caveolin-2                                                     |
| P10586 | Receptor-type tyrosine-protein phosphatase F                   |
| P18031 | Tyrosine-protein phosphatase non-receptor type 1               |
| P00533 | Epidermal growth factor receptor                               |
| P03301 | Genome polyprotein                                             |
| P20936 | Ras GTPase-activating protein 1                                |
| P41240 | Tyrosine-protein kinase CSK                                    |
| O95810 | Serum deprivation-response protein                             |
| P12931 | Proto-oncogene tyrosine-protein kinase Src                     |
| P60484 | PTEN                                                           |
| P08183 | Multidrug resistance protein 1                                 |
| Q03160 | Growth factor receptor-bound protein 7                         |
| Q12933 | TNF receptor-associated factor 2                               |

|        |                                                   |
|--------|---------------------------------------------------|
| P01112 | GTPase HRas                                       |
| P29350 | Tyrosine-protein phosphatase non-receptor type 6  |
| Q16881 | Thioredoxin reductase 1, cytoplasmic              |
| Q969G5 | Protein kinase C delta-binding protein            |
| Q06124 | Tyrosine-protein phosphatase non-receptor type 11 |
| Q14108 | Lysosome membrane protein 2                       |

## INTERACTOME FOR CENPC1

|        |                                                           |
|--------|-----------------------------------------------------------|
| Q5SUE7 | Adenosine deaminase domain-containing protein 1           |
| Q9ES28 | Rho guanine nucleotide exchange factor 7                  |
| Q8CDM1 | ATPase family AAA domain-containing protein 2             |
| Q925I1 | ATPase family AAA domain-containing protein 3             |
| Q03265 | ATP synthase subunit alpha, mitochondrial                 |
| P46737 | Lys-63-specific deubiquitinase BRCC36                     |
| Q9WVA3 | Mitotic checkpoint protein BUB3                           |
| Q60865 | Caprin-1                                                  |
| Q66JQ7 | Protein CASC5                                             |
| Q9CWN7 | UPF0760 protein C2orf29 homolog                           |
| Q9CR02 | UPF0534 protein C4orf43 homolog                           |
| P24788 | Cyclin-dependent kinase 11B                               |
| O35216 | Histone H3-like centromeric protein A                     |
| Q8K1K4 | Centromere protein I                                      |
| Q9ESN5 | Centromere protein K                                      |
| Q9CQA0 | Centromere protein M                                      |
| Q9CZW2 | Centromere protein N                                      |
| Q8K015 | Centromere protein O                                      |
| Q9CZ92 | Centromere protein P                                      |
| Q9CPQ5 | Centromere protein Q                                      |
| Q6PDQ2 | Chromodomain-helicase-DNA-binding protein 4               |
| Q9DA19 | Corepressor interacting with RBPJ 1                       |
| Q68FD5 | Clathrin heavy chain 1                                    |
| O35492 | Dual specificity protein kinase CLK3                      |
| Q9CQF3 | Cleavage and polyadenylation specificity factor subunit 5 |
| Q60737 | Casein kinase II subunit alpha                            |
| O54833 | Casein kinase II subunit alpha'                           |
| P67871 | Casein kinase II subunit beta                             |
| Q64368 | Deleted in azoospermia-like                               |
| Q91VR5 | ATP-dependent RNA helicase DDX1                           |



|        |                                                                    |
|--------|--------------------------------------------------------------------|
| Q9QY15 | ATP-dependent RNA helicase DDX25                                   |
| O35286 | Putative pre-mRNA-splicing factor ATP-dependent RNA helicase DHX15 |
| O70133 | ATP-dependent RNA helicase A                                       |
| Q9DA79 | Dipeptidase 3                                                      |
| P51807 | Dynein light chain Tctex-type 1                                    |
| Q61545 | RNA-binding protein EWS                                            |
| Q69ZR9 | Protein FAM208A                                                    |
| Q5DTT3 | Protein FAM208B                                                    |
| P35550 | rRNA 2'-O-methyltransferase fibrillarin                            |
| P35922 | Fragile X mental retardation protein 1 homolog                     |
| Q61584 | Fragile X mental retardation syndrome-related protein 1            |
| Q9WVR4 | Fragile X mental retardation syndrome-related protein 2            |
| Q68FF6 | ARF GTPase-activating protein GIT1                                 |
| Q9JLQ2 | ARF GTPase-activating protein GIT2                                 |
| Q8CGP6 | Histone H2A type 1-H                                               |
| P70696 | Histone H2B type 1-A                                               |
| P84228 | Histone H3.2                                                       |
| Q9Z0R0 | Serine/threonine-protein kinase haspin                             |
| O09106 | Histone deacetylase 1                                              |
| P70288 | Histone deacetylase 2                                              |
| Q6PAV2 | Probable E3 ubiquitin-protein ligase HERC4                         |
| P16627 | Heat shock 70 kDa protein 1-like                                   |
| Q60960 | Importin subunit alpha-1                                           |
| P70168 | Importin subunit beta-1                                            |
| Q5SVQ0 | Histone acetyltransferase KAT7                                     |
| Q61033 | Lamina-associated polypeptide 2, isoforms alpha/zeta               |
| P06151 | L-lactate dehydrogenase A chain                                    |
| P00342 | L-lactate dehydrogenase C chain                                    |
| P14733 | Lamin-B1                                                           |
| Q8K310 | Matrin-3                                                           |
| Q9CY25 | Protein MIS12 homolog                                              |
| P97434 | Myosin phosphatase Rho-interacting protein                         |
| P54276 | DNA mismatch repair protein Msh6                                   |

|        |                                                                                                      |
|--------|------------------------------------------------------------------------------------------------------|
| Q8K4B0 | Metastasis-associated protein MTA1                                                                   |
| Q9R190 | Metastasis-associated protein MTA2                                                                   |
| Q6DID5 | PWWP domain-containing protein MUM1                                                                  |
| Q8C854 | Myelin expression factor 2 (MEF-2) (MyEF-2)                                                          |
| Q91W39 | Nuclear receptor coactivator 5 (NCoA-5)                                                              |
| P30415 | NK-tumor recognition protein                                                                         |
| Q8R0G9 | Nuclear pore complex protein Nup133                                                                  |
| Q9JIH2 | Nuclear pore complex protein Nup50                                                                   |
| Q9DAK2 | Parkin coregulated gene protein homolog                                                              |
| Q9JMB7 | Piwi-like protein 1                                                                                  |
| Q8CDG1 | Piwi-like protein 2                                                                                  |
| Q9CPV5 | Polyamine-modulated factor 1                                                                         |
| A2AR02 | Peptidyl-prolyl cis-trans isomerase G                                                                |
| Q61136 | Serine/threonine-protein kinase PRP4 homolog                                                         |
| P60484 | Phosphatidylinositol 3,4,5-trisphosphate 3-phosphatase and dual-specificity protein phosphatase PTEN |
| Q60973 | Histone-binding protein RBBP7                                                                        |
| Q8C2Q3 | RNA-binding protein 14                                                                               |
| Q8VH51 | RNA-binding protein 39                                                                               |
| A2AU37 | Double-strand-break repair protein rad21-like protein 1                                              |
| Q99J62 | Replication factor C subunit 4                                                                       |
| Q99MV7 | RING finger protein 17                                                                               |
| Q9DBU5 | E3 ubiquitin-protein ligase RNF6                                                                     |
| P08775 | DNA-directed RNA polymerase II subunit RPB1                                                          |
| P60122 | RuvB-like 1                                                                                          |
| Q9WTM5 | RuvB-like 2                                                                                          |
| Q9QX47 | Protein SON                                                                                          |
| Q9D083 | Kinetochore protein Spc24                                                                            |
| Q9CUU3 | Synaptonemal complex protein 2 (SCP-2)                                                               |
| Q9ERA6 | Tuftelin-interacting protein 11                                                                      |
| Q01320 | DNA topoisomerase 2-alpha                                                                            |
| Q569Z6 | Thyroid hormone receptor-associated protein 3                                                        |
| O08810 | 116 kDa U5 small nuclear ribonucleoprotein component                                                 |
| Q8K4P0 | pre-mRNA 3' end processing protein WDR33                                                             |

|        |                                                                         |
|--------|-------------------------------------------------------------------------|
| Q5U4F6 | WD repeat-containing protein 34                                         |
| Q0GGX2 | Zinc finger protein 541                                                 |
| Q3TTV6 | Tuftelin-interacting protein 11                                         |
| Q543F1 | Elongation factor Tu GTP binding domain containing 2                    |
| A3QK68 | MIS12 homolog                                                           |
| A3KPD0 | Histone H2A                                                             |
| B8JK54 | Centromere protein O                                                    |
| Q0VB91 | PARK2 co-regulated                                                      |
| A2A9P5 | Cell division cycle 2-like 1                                            |
| B1AV89 | Centromere protein I                                                    |
| Q3TXT7 | RuvB-like protein 2                                                     |
| B9EI85 | Histone H3                                                              |
| Q8BTS0 | DEAD (Asp-Glu-Ala-Asp) box polypeptide 5                                |
| Q6ZQG1 | MCG21756, isoform CRA_a                                                 |
| Q80U43 | MKIAA0310 protein (SEC16 homolog A ( <i>S. cerevisiae</i> )) (Fragment) |
| Q7TSF9 | Protein 2610020H08Rik                                                   |
| A1L347 | Heat shock protein 1-like                                               |
| Q8BIZ8 | Protein Scaper                                                          |
| D3Z3J7 | Protein 2610020H08Rik (RIKEN cDNA 2610020H08, isoform CRA_h)            |
| Q58E49 | Histone deacetylase                                                     |
| Q91VA7 | Isocitrate dehydrogenase 3 (NAD+) beta                                  |
| Q3U1C2 | MCG130614                                                               |
| Q548Z6 | L-lactate dehydrogenase                                                 |
| Q3UKJ6 | DEAH (Asp-Glu-Ala-His) box polypeptide 15, isoform CRA_a                |
| Q5BL18 | Matrin 3                                                                |
| Q564E2 | L-lactate dehydrogenase                                                 |
| B2RVI6 | Centromere protein P                                                    |
| A2AJI4 | Thyroid hormone receptor associated protein 3                           |
| Q8R5E6 | Ythdc1 protein (Fragment)                                               |
| Q545V8 | Putative uncharacterized protein                                        |
| Q8BR71 | Putative uncharacterized protein (Fragment)                             |
| Q8C5H3 | Putative uncharacterized protein                                        |
| E9PYL1 | Protein Chd5                                                            |

|           |                                                                                             |
|-----------|---------------------------------------------------------------------------------------------|
| Q3UE68    | Putative uncharacterized protein                                                            |
| Q3UHW8    | Putative uncharacterized protein                                                            |
| Q8CDH5    | Putative uncharacterized protein (Fragment)                                                 |
| Q3UFG2    | Putative uncharacterized protein (Fragment)                                                 |
| Q8BJ53    | Putative uncharacterized protein                                                            |
| Q3U057    | Putative uncharacterized protein                                                            |
| A0AUV1    | Histone H2A (Fragment)                                                                      |
| Q3V0L1    | Putative uncharacterized protein                                                            |
| Q3UXK4    | Putative uncharacterized protein                                                            |
| A2AWQ8    | Novel protein, possible orthologue of human CBF1 interacting corepressor                    |
| Q3TLX0    | Putative uncharacterized protein (Fragment)                                                 |
| Q3TFD9    | Putative uncharacterized protein                                                            |
| Q9ERA8    | ATP synthase gamma chain                                                                    |
| Q69ZZ3    | MKIAA0788 protein (Fragment)                                                                |
| Q61464    | Zinc finger protein 638                                                                     |
| Q8C854    | Myelin expression factor 2                                                                  |
| Q5SS40    | Tyrosine 3-monooxygenase/tryptophan 5-monooxygenase activation protein, epsilon polypeptide |
| I49707    | germ cell specific gene 3 protein                                                           |
| Q9D2X5    | MAU2 chromatid cohesion factor homolog                                                      |
| Q8K305    | kinetochore-associated protein NSL1 homolog                                                 |
| P70281    | synaptonemal complex protein 3                                                              |
| P62259    | 14-3-3 protein epsilon                                                                      |
| NP_940810 | tudor domain-containing protein 6 isoform 2                                                 |
| Q9CQL1    | Protein mago nashi homolog 1-related                                                        |
| Q8BJ01    | ubiquitin associated protein 2-like                                                         |
| Q8CJI4    | H1 histone family, member N, testis-specific                                                |
| Q8R081    | Heterogeneous nuclear ribonucleoprotein L                                                   |
| Q9CV89    | pinin                                                                                       |
| Q3TWV0    | vimentin                                                                                    |
| Q3TLK3    | expressed sequence AU014645; nuclear cap binding protein subunit 1                          |
| P15331    | Peripherin                                                                                  |
| A0PJG9    | retinoblastoma binding protein 6                                                            |
| Q3UJZ7    | predicted gene 5243; NOP56 ribonucleoprotein homolog (yeast)                                |

|        |                                                                                                                                                                                                                                                                                                                                     |
|--------|-------------------------------------------------------------------------------------------------------------------------------------------------------------------------------------------------------------------------------------------------------------------------------------------------------------------------------------|
| P68040 | Guanine nucleotide-binding protein subunit beta-2-like 1                                                                                                                                                                                                                                                                            |
| B2DD01 | Retinoic acid induced 14                                                                                                                                                                                                                                                                                                            |
| Q05BN4 | serine/arginine repetitive matrix 2; similar to Serine/arginine repetitive matrix protein 2; similar to retinitis pigmentum GTPase regulator                                                                                                                                                                                        |
| Q58E64 | predicted gene 5869; predicted gene 7161; predicted gene 7105; predicted gene 5822; similar to eukaryotic translation elongation factor 1 alpha 1; predicted gene 6192; predicted gene 6392; predicted gene 6767; predicted gene 6170; predicted gene 6548; predicted gene 6789; eukaryotic translation elongation factor 1 alpha 1 |
| Q45VK5 | interleukin enhancer binding factor 3                                                                                                                                                                                                                                                                                               |
| D3ZIF7 | mediator complex subunit 1                                                                                                                                                                                                                                                                                                          |
| Q6P5B5 | fragile X mental retardation, autosomal homolog 2                                                                                                                                                                                                                                                                                   |
| Q8BU35 | RNA binding motif protein 25                                                                                                                                                                                                                                                                                                        |
| Q8CIA8 | uveal autoantigen with coiled-coil domains and ankyrin repeats                                                                                                                                                                                                                                                                      |
| A2AU37 | Double-strand-break repair protein rad21-like protein 1                                                                                                                                                                                                                                                                             |
| Q8C211 | ankyrin repeat domain 32                                                                                                                                                                                                                                                                                                            |
| Q9Z2U6 | spermatogenesis associated 5                                                                                                                                                                                                                                                                                                        |
| Q05C68 | mitochondrial carrier homolog 2 (C. elegans)                                                                                                                                                                                                                                                                                        |
| Q8BRY5 | topoisomerase (DNA) II beta                                                                                                                                                                                                                                                                                                         |
| Q3UXI9 | interleukin enhancer binding factor 2                                                                                                                                                                                                                                                                                               |
| Q3U7T8 | heat shock protein 5                                                                                                                                                                                                                                                                                                                |
| Q99MV7 | RING finger protein 17                                                                                                                                                                                                                                                                                                              |

## INTERACTOME FOR DLG1

|        |                                                                        |
|--------|------------------------------------------------------------------------|
| P78536 | Disintegrin and metalloproteinase domain-containing protein 17         |
| Q4VCS5 | Angiomotin                                                             |
| A1A5B4 | Anoctamin-9                                                            |
| Q9ULH1 | Arf-GAP with SH3 domain, ANK repeat and PH domain-containing protein 1 |
| P23634 | Plasma membrane calcium-transporting ATPase 4                          |
| Q9NS75 | Cysteinyl leukotriene receptor 2                                       |
| P89079 | E4-ORF1                                                                |
| O70421 | Frizzled-1                                                             |
| Q61088 | Frizzled-4                                                             |
| Q61090 | Frizzled-7                                                             |
| P22001 | Potassium voltage-gated channel subfamily A member 3                   |
| P15385 | Potassium voltage-gated channel subfamily A member 4                   |
| Q9NQT8 | Kinesin-like protein KIF13B                                            |
| P06239 | Tyrosine-protein kinase Lck                                            |
| Q99759 | Mitogen-activated protein kinase kinase kinase 3                       |
| P36507 | Dual specificity mitogen-activated protein kinase kinase 2             |
| Q96KB5 | Lymphokine-activated killer T-cell-originated protein kinase           |
| P06428 | Protein E6                                                             |
| Q4ZGA4 | Tax (Fragment)                                                         |

## INTERACTOME FOR MAGI2

|        |                                                                      |
|--------|----------------------------------------------------------------------|
| O43424 | Glutamate receptor delta-2 subunit                                   |
| O35116 | Catenin delta-2                                                      |
| O94850 | Dendrin                                                              |
| P35439 | Glutamate [NMDA] receptor subunit zeta-1                             |
| P62630 | Elongation factor 1-alpha 1                                          |
| Q00959 | Glutamate [NMDA] receptor subunit epsilon-1                          |
| Q00961 | Glutamate [NMDA] receptor subunit epsilon-3                          |
| Q02563 | Synaptic vesicle glycoprotein 2A                                     |
| Q62640 | Glutamate receptor delta-1 subunit                                   |
| Q62765 | Neuroigin-1                                                          |
| Q62824 | Exocyst complex component 4                                          |
| Q9WU82 | Catenin beta-1                                                       |
| P31424 | Metabotropic glutamate receptor 5                                    |
| P97838 | Disks large-associated protein 3                                     |
| P97837 | Disks large-associated protein 2                                     |
| Q6GMN2 | Brain-specific angiogenesis inhibitor 1-associated protein 2         |
| P97839 | Disks large-associated protein 4                                     |
| P38444 | Activin receptor type-2A                                             |
| O54857 | PTEN                                                                 |
| Q8R4T5 | General receptor for phosphoinositides 1-associated scaffold protein |
| Q63374 | Neurexin-2-alpha                                                     |
| P97836 | Disks large-associated protein 1                                     |
| Q9R012 | Serine/threonine-protein kinase PLK2                                 |
| Q96B97 | SH3 domain-containing kinase-binding protein 1                       |
| P23471 | Receptor-type tyrosine-protein phosphatase zeta                      |

## **INTERACTOME FOR MAGI3**

|        |                                                     |
|--------|-----------------------------------------------------|
| Q70EL4 | Ubiquitin carboxyl-terminal hydrolase 43            |
| Q8TD84 | Down syndrome cell adhesion molecule-like protein 1 |
| Q9ULL4 | Plexin-B3                                           |
| P08588 | Beta-1 adrenergic receptor                          |
| Q92823 | Neuronal cell adhesion molecule                     |



## INTERACTOME FOR MAG11

|        |                                                         |
|--------|---------------------------------------------------------|
| Q12959 | Disks large homolog 1                                   |
| P01106 | Myc proto-oncogene protein                              |
| Q5NHE7 | DNA gyrase subunit B                                    |
| Q5NEC0 | Phosphoribosylformylglycinamide synthase                |
| P08588 | Beta-1 adrenergic receptor                              |
| Q7L1Q6 | Basic leucine zipper and W2 domain-containing protein 1 |
| A5XAW2 | Kinesin heavy chain                                     |
| P63000 | Ras-related C3 botulinum toxin substrate 1              |
| Q7CGN3 | rtn5                                                    |
| O94868 | FCH and double SH3 domains protein 2                    |
| Q81XA4 | Preprotein translocase, SecE subunit                    |
| F1PTW8 | FCHSD2                                                  |
| Q9NSI5 | Immunoglobulin superfamily member 5                     |
| O43707 | Alpha-actinin-4                                         |
| Q8N3V7 | Synaptopodin                                            |
| P98164 | Low-density lipoprotein receptor-related protein 2      |
| Q9Y624 | Junctional adhesion molecule A                          |
| Q96AP7 | Endothelial cell-selective adhesion molecule            |
| Q96J66 | ATP-binding cassette sub-family C member 11             |
| Q16774 | Guanylate kinase                                        |
| O00548 | Delta-like protein 1                                    |
| P12814 | Alpha-actinin-1                                         |

## INTERACTOME FOR MVP

|        |                                        |
|--------|----------------------------------------|
| Q14764 | Major vault protein                    |
| Q81N92 | Putative uncharacterized protein       |
| Q7CL30 | Putative uncharacterized protein       |
| Q07065 | Cytoskeleton-associated protein 4      |
| Q81TT4 | Chaperone protein ClpB                 |
| Q81ZA2 | Methyl-accepting chemotaxis protein    |
| Q81ME0 | Phosphopentomutase                     |
| P00738 | Haptoglobin                            |
| P34913 | Epoxide hydrolase 2                    |
| P52292 | Importin subunit alpha-2               |
| O15162 | Phospholipid scramblase 1              |
| Q14161 | ARF GTPase-activating protein GIT2     |
| Q13423 | NAD(P) transhydrogenase, mitochondrial |
| Q9NUX5 | Protection of telomeres protein 1      |
| P00156 | Cytochrome b                           |
| P63104 | 14-3-3 protein zeta/delta              |
| Q9WMX2 | Genome polyprotein                     |
| Q13573 | SNW domain-containing protein 1        |
| Q99459 | Cell division cycle 5-like protein     |

## **INTERACTOME FOR MAST2**

|        |                                                 |
|--------|-------------------------------------------------|
| Q12933 | TNF receptor-associated factor 2                |
| Q9Y4K3 | TNF receptor-associated factor 6                |
| P60484 | PTEN                                            |
| P0CG47 | Polyubiquitin-B                                 |
| Q61235 | Beta-2-syntrophin                               |
| Q61983 | Sodium-dependent phosphate transport protein 1  |
| Q60825 | Sodium-dependent phosphate transport protein 2A |

## **INTERACTOME FOR MAST3**

|        |                                                           |
|--------|-----------------------------------------------------------|
| Q9C0A0 | Contactin-associated protein-like 4                       |
| Q04917 | 14-3-3 protein eta                                        |
| O43741 | 5'-AMP-activated protein kinase subunit beta-2            |
| P54646 | 5'-AMP-activated protein kinase catalytic subunit alpha-2 |
| P60484 | PTEN                                                      |

## **INTERACTOME FOR MAST1**

|        |                              |
|--------|------------------------------|
| Q61235 | Beta-2-syntrophin            |
| P29476 | Nitric oxide synthase, brain |
| P60484 | PTEN                         |

## INTERACTOME FOR MSP58

|        |                                                               |
|--------|---------------------------------------------------------------|
| O95071 | E3 ubiquitin-protein ligase UBR5                              |
| Q63HN8 | E3 ubiquitin-protein ligase RNF213                            |
| P56537 | Eukaryotic translation initiation factor 6                    |
| Q8WZ42 | Titin                                                         |
| Q9NZM3 | Intersectin-2                                                 |
| O14986 | Phosphatidylinositol 4-phosphate 5-kinase type-1 beta         |
| P10644 | cAMP-dependent protein kinase type I-alpha regulatory subunit |
| P68400 | Casein kinase II subunit alpha                                |
| Q5T4S7 | E3 ubiquitin-protein ligase UBR4                              |
| P67870 | Casein kinase II subunit beta                                 |
| Q9Y3C0 | WASH complex subunit CCDC53                                   |
| Q86WP2 | Vasculin                                                      |
| Q96CN9 | GRIP and coiled-coil domain-containing protein 1              |
| Q81LM9 | Phenylalanine-4-hydroxylase, putative                         |
| P62312 | U6 snRNA-associated Sm-like protein LSm6                      |
| P40425 | Pre-B-cell leukemia transcription factor 2                    |
| Q9BQD3 | KxDL motif-containing protein 1                               |
| Q8NBZ0 | INO80 complex subunit E                                       |
| P43364 | Melanoma-associated antigen 11                                |
| Q9C0F1 | Centrosomal protein of 44 kDa                                 |
| Q15834 | Coiled-coil domain-containing protein 85B                     |
| Q86SE5 | RNA-binding Raly-like protein                                 |
| Q9Y2W2 | WW domain-binding protein 11                                  |
| P51116 | Fragile X mental retardation syndrome-related protein 2       |
| P0C1Z6 | TCF3 fusion partner                                           |
| Q6PI98 | INO80 complex subunit C                                       |
| Q9D1P2 | Histone acetyltransferase KAT8                                |
| Q53TQ3 | INO80 complex subunit D                                       |
| Q9Y5K5 | Ubiquitin carboxyl-terminal hydrolase isozyme L5              |
| Q9BZI7 | Regulator of nonsense transcripts 3B                          |
| O94972 | E3 ubiquitin-protein ligase TRIM37                            |
| Q8IXK0 | Polyhomeotic-like protein 2                                   |
| P61964 | WD repeat-containing protein 5                                |
| Q9NPJ6 | Mediator of RNA polymerase II transcription subunit 4         |
| Q6P4R8 | Nuclear factor related to kappa-B-binding protein             |
| Q9H9F9 | Actin-related protein 5                                       |
| Q9C086 | INO80 complex subunit B                                       |
| Q9H981 | Actin-related protein 8                                       |
| O96019 | Actin-like protein 6A                                         |
| Q9ULG1 | DNA helicase INO80                                            |
| Q9UER7 | Death domain-associated protein 6                             |
| O14641 | Segment polarity protein dishevelled homolog DVL-2            |

|        |              |
|--------|--------------|
| Q9Y265 | RuvB-like 1  |
| Q9Y230 | RuvB-like 2  |
| B7ZL83 | DGKB protein |

## INTERACTOME FOR NEPRILYSIN

|        |                                                                             |
|--------|-----------------------------------------------------------------------------|
| P51648 | Fatty aldehyde dehydrogenase                                                |
| Q14554 | Protein disulfide-isomerase A5                                              |
| Q92973 | Transportin-1                                                               |
| P02545 | Prelamin-A/C                                                                |
| P04792 | Heat shock protein beta-1                                                   |
| P46783 | 40S ribosomal protein S10                                                   |
| Q16795 | NADH dehydrogenase [ubiquinone] 1 alpha subcomplex subunit 9, mitochondrial |
| P62266 | 40S ribosomal protein S23                                                   |
| O43187 | Interleukin-1 receptor-associated kinase-like 2                             |
| P36776 | Lon protease homolog, mitochondrial                                         |
| P68104 | Elongation factor 1-alpha 1                                                 |
| P62888 | 60S ribosomal protein L30                                                   |
| O15321 | Transmembrane 9 superfamily member 1                                        |
| Q9H1E3 | Nuclear ubiquitous casein and cyclin-dependent kinases substrate            |
| P13645 | Keratin, type I cytoskeletal 10                                             |
| Q9BRK5 | 45 kDa calcium-binding protein                                              |
| Q86UE4 | Protein LYRIC                                                               |
| Q9H9J2 | 39S ribosomal protein L44, mitochondrial                                    |
| P40616 | ADP-ribosylation factor-like protein 1                                      |
| Q92835 | Phosphatidylinositol 3,4,5-trisphosphate 5-phosphatase 1                    |
| O00519 | Fatty-acid amide hydrolase 1                                                |
| P53985 | Monocarboxylate transporter 1                                               |
| Q04609 | Glutamate carboxypeptidase 2                                                |
| Q3ZCM7 | Tubulin beta-8 chain                                                        |
| P54707 | Potassium-transporting ATPase alpha chain 2                                 |
| P12268 | Inosine-5'-monophosphate dehydrogenase 2                                    |
| O75844 | CAAX prenyl protease 1 homolog                                              |
| P46939 | Utrophin                                                                    |
| P60709 | Actin, cytoplasmic 1                                                        |
| Q14978 | Nucleolar and coiled-body phosphoprotein 1                                  |



|          |                                                             |
|----------|-------------------------------------------------------------|
| Q9Y265   | RuvB-like 1                                                 |
| Q9Y6F6   | Protein MRVI1                                               |
| Q8NBM4   | Ubiquitin-associated domain-containing protein 2            |
| P12004   | Proliferating cell nuclear antigen                          |
| O95168   | NADH dehydrogenase [ubiquinone] 1 beta subcomplex subunit 4 |
| Q9Y230   | RuvB-like 2                                                 |
| Q13423   | NAD(P) transhydrogenase, mitochondrial                      |
| Q96JB5-1 | CDK5 regulatory subunit-associated protein 3                |
| Q14254   | Flotillin-2                                                 |
| P11586   | C-1-tetrahydrofolate synthase, cytoplasmic                  |
| P22830   | Ferrochelatase, mitochondrial                               |
| Q8NEG4   | Protein FAM83F                                              |
| P13010   | X-ray repair cross-complementing protein 5                  |
| Q05519   | Serine/arginine-rich splicing factor 11                     |
| Q9NXW2   | DnaJ homolog subfamily B member 12                          |
| P61225   | Ras-related protein Rap-2b                                  |
| P08107   | Heat shock 70 kDa protein 1A/1B                             |
| Q8N2F6   | Armadillo repeat-containing protein 10                      |
| P45880   | Voltage-dependent anion-selective channel protein 2         |
| Q92597   | Protein NDRG1                                               |
| P51571   | Translocon-associated protein subunit delta                 |
| P0C0S8   | Histone H2A type 1                                          |
| O60313-2 | Dynamin-like 120 kDa protein, mitochondrial                 |
| P35579   | Myosin-9                                                    |
| P56134   | ATP synthase subunit f, mitochondrial                       |
| Q8NAB2   | Kelch repeat and BTB domain-containing protein 3            |
| Q6P587   | Acylpyruvase FAHD1, mitochondrial                           |
| Q9H8H3   | Methyltransferase-like protein 7A                           |
| P11142   | Heat shock cognate 71 kDa protein                           |
| Q16630-1 | Cleavage and polyadenylation specificity factor subunit 6   |
| Q9H2X3   | C-type lectin domain family 4 member M                      |
| Q6IAA8   | Ragulator complex protein LAMTOR1                           |
| Q14498   | RNA-binding protein 39                                      |

|        |                                                                              |
|--------|------------------------------------------------------------------------------|
| P82663 | 28S ribosomal protein S25, mitochondrial                                     |
| O95299 | NADH dehydrogenase [ubiquinone] 1 alpha subcomplex subunit 10, mitochondrial |
| Q9H0X4 | Protein ITFG3                                                                |
| Q6S545 | POTE ankyrin domain family member H                                          |
| O14745 | Na(+)/H(+) exchange regulatory cofactor NHE-RF1                              |
| P01160 | Natriuretic peptides A                                                       |
| P20366 | Protachykinin-1                                                              |
| P08246 | Neutrophil elastase                                                          |
| P05067 | Amyloid beta A4 protein                                                      |
| P15144 | Aminopeptidase N                                                             |
| P05305 | Endothelin-1                                                                 |
| Q5T208 | Nicastrin                                                                    |
| P14735 | Insulin-degrading enzyme                                                     |
| P23582 | C-type natriuretic peptide                                                   |
| P20800 | Endothelin-2                                                                 |

## INTERACTOME FOR NHERF1

|          |                                                                          |
|----------|--------------------------------------------------------------------------|
| O14745   | NHERF1                                                                   |
| P26043   | Radixin                                                                  |
| P13569   | Cystic fibrosis transmembrane conductance regulator                      |
| Q9ULV1   | Frizzled-4                                                               |
| p35240-1 | Mediator of RNA polymerase II transcription subunit 28                   |
| P08473   | Neprilysin                                                               |
| Q6ZVD8   | PH domain leucine-rich repeat-containing protein phosphatase 2           |
| P26038   | Moesin                                                                   |
| P51790   | H(+)/Cl(-) exchange transporter 3                                        |
| Q5VIY5   | Zinc finger protein 468                                                  |
| O95999   | B-cell lymphoma/leukemia 10                                              |
| P41145   | Kappa-type opioid receptor                                               |
| P47900   | P2Y purinoceptor 1                                                       |
| Q9R0W0   | Metabotropic glutamate receptor type 1                                   |
| O08586   | Pten                                                                     |
| P23508   | Colorectal mutant cancer protein                                         |
| P07550   | Beta-2 adrenergic receptor                                               |
| P05622   | Platelet-derived growth factor receptor beta                             |
| P07947   | Tyrosine-protein kinase Yes                                              |
| P46937   | Yorkie homolog                                                           |
| P15311   | Ezrin                                                                    |
| Q9BXI6   | TBC1 domain family member 10A                                            |
| Q01970   | 1-phosphatidylinositol 4,5-bisphosphate phosphodiesterase beta-3         |
| P41231   | P2Y purinoceptor 2                                                       |
| Q9Y6Q1   | Calpain-6                                                                |
| Q68EM7   | Rho GTPase-activating protein 17                                         |
| Q9NWQ8   | Phosphoprotein associated with glycosphingolipid-enriched microdomains 1 |

## INTERACTOME FOR NHERF2

|        |                                                                  |
|--------|------------------------------------------------------------------|
| P26043 | Radixin                                                          |
| Q8CZH6 | Putative fimbrial chaperone                                      |
| Q9HBW0 | Lysophosphatidic acid receptor 2                                 |
| Q6GQQ9 | OTU domain-containing protein 7B                                 |
| Q6ZVD8 | PH domain leucine-rich repeat-containing protein phosphatase 2   |
| O60346 | PH domain leucine-rich repeat-containing protein phosphatase 1   |
| P58700 | Trp operon repressor                                             |
| P13569 | Cystic fibrosis transmembrane conductance regulator              |
| Q9R0W0 | Metabotropic glutamate receptor type 1                           |
| P23508 | Colorectal mutant cancer protein                                 |
| P40879 | Chloride anion exchanger                                         |
| P51432 | 1-phosphatidylinositol 4,5-bisphosphate phosphodiesterase beta-3 |
| P60484 | PTEN                                                             |
| Q05066 | Sex-determining region Y protein                                 |
| P09619 | Platelet-derived growth factor receptor beta                     |
| Q8IUQ4 | E3 ubiquitin-protein ligase SIAH1                                |
| P46937 | Yorkie homolog                                                   |
| Q9BXI6 | TBC1 domain family member 10A                                    |
| Q01814 | Plasma membrane calcium-transporting ATPase 2                    |

## INTERACTOME FOR P53

|        |                                                                                   |
|--------|-----------------------------------------------------------------------------------|
| P62258 | 14-3-3 protein epsilon                                                            |
| P61981 | 14-3-3 protein gamma                                                              |
| P31947 | 14-3-3 protein sigma                                                              |
| P63103 | 14-3-3 protein zeta/delta                                                         |
| Q13362 | Serine/threonine-protein phosphatase 2A 56 kDa regulatory subunit gamma isoform   |
| P30153 | Serine/threonine-protein phosphatase 2A 65 kDa regulatory subunit A alpha isoform |
| P63151 | Serine/threonine-protein phosphatase 2A 55 kDa regulatory subunit B alpha isoform |
| Q8ZHG0 | Putative agmatine deiminase                                                       |
| Q13155 | Aminoacyl tRNA synthase complex-interacting multifunctional protein 2             |
| P10275 | Androgen receptor                                                                 |
| Q01484 | Ankyrin-2                                                                         |
| P12429 | Annexin A3                                                                        |
| P20073 | Annexin A7                                                                        |
| P02749 | Beta-2-glycoprotein 1                                                             |
| Q7Z2E3 | Aprataxin                                                                         |
| O95376 | E3 ubiquitin-protein ligase ARIH2                                                 |
| P36405 | ADP-ribosylation factor-like protein 3                                            |
| Q86WX3 | Active regulator of SIRT1 )                                                       |
| Q96KQ4 | Apoptosis-stimulating of p53 protein 1                                            |
| Q13625 | Apoptosis-stimulating of p53 protein 2                                            |
| P18847 | Cyclic AMP-dependent transcription factor ATF-3                                   |
| Q13315 | Serine-protein kinase ATM                                                         |
| Q13535 | Serine/threonine-protein kinase ATR                                               |
| O15169 | Axin-1                                                                            |
| Q07817 | Bcl-2-like protein 1                                                              |
| Q8N9N5 | Protein BANP                                                                      |
| Q99728 | BRCA1-associated RING domain protein 1                                            |
| O70445 | BRCA1-associated RING domain protein 1                                            |
| P10415 | Apoptosis regulator Bcl-2                                                         |
| O14503 | Class E basic helix-loop-helix protein 40                                         |

|        |                                                  |
|--------|--------------------------------------------------|
| P13497 | Bone morphogenetic protein 1                     |
| P51813 | Cytoplasmic tyrosine-protein kinase BMX          |
| P38398 | Breast cancer type 1 susceptibility protein      |
| P51587 | Breast cancer type 2 susceptibility protein      |
| Q9NPI1 | Bromodomain-containing protein 7                 |
| Q5VTR2 | E3 ubiquitin-protein ligase BRE1A                |
| O75150 | E3 ubiquitin-protein ligase BRE1B                |
| Q9BX70 | BTB/POZ domain-containing protein 2              |
| Q8TDN4 | CDK5 and ABL1 enzyme substrate 1                 |
| Q9ESJ1 | CDK5 and ABL1 enzyme substrate 1                 |
| Q92793 | CREB-binding protein                             |
| P45481 | CREB-binding protein                             |
| Q9BWC9 | Coiled-coil domain-containing protein 106        |
| P55774 | C-C motif chemokine 18                           |
| Q8N726 | Cyclin-dependent kinase inhibitor 2A, isoform 4  |
| Q64364 | Cyclin-dependent kinase inhibitor 2A, isoform 3  |
| P60953 | Cell division control protein 42 homolog         |
| P06493 | Cyclin-dependent kinase 1 (CDK1)                 |
| P38936 | Cyclin-dependent kinase inhibitor 1              |
| P42773 | Cyclin-dependent kinase 4 inhibitor C            |
| P17676 | CCAAT/enhancer-binding protein beta (C/EBP beta) |
| Q03701 | CCAAT/enhancer-binding protein zeta              |
| O14757 | Serine/threonine-protein kinase Chk1             |
| O96017 | Serine/threonine-protein kinase Chk2             |
| Q99966 | Cbp/p300-interacting transactivator 1            |
| Q14061 | Cytochrome c oxidase copper chaperone            |
| Q14999 | Cullin-7                                         |
| Q8IWT3 | Cullin-9                                         |
| Q9UER7 | Death domain-associated protein 6                |
| O14576 | Cytoplasmic dynein 1 intermediate chain 1        |
| Q92841 | Probable ATP-dependent RNA helicase DDX17        |
| P17844 | Probable ATP-dependent RNA helicase DDX5         |
| P0A6Y8 | Chaperone protein DnaK (HSP70)                   |

Q9BV47 Dual specificity protein phosphatase 26  
O14641 Segment polarity protein dishevelled homolog DVL-2  
P03244 E1B protein, large T-antigen  
P04489 Probable early E4 11 kDa protein  
P18146 Early growth response protein 1  
Q09472 Histone acetyltransferase p300  
P84090 Enhancer of rudimentary homolog  
Q15910 Histone-lysine N-methyltransferase EZH2  
Q9BQD7 Protein FAM173A  
Q05397 Focal adhesion kinase 1  
Q86XK2 F-box only protein 11  
Q8WWV6 High affinity immunoglobulin alpha and immunoglobulin mu Fc receptor  
Q8ZJL7 Cation-efflux pump FieF  
O43524 Forkhead box protein O3  
Q9H0Q3 FXFD domain-containing ion transport regulator 6  
P24522 Growth arrest and DNA damage-inducible protein GADD45 alpha  
Q5NIP5 Aspartyl/glutamyl-tRNA(Asn/Gln) amidotransferase subunit B  
Q9NVN8 Guanine nucleotide-binding protein-like 3-like protein  
Q9BVP2 Guanine nucleotide-binding protein-like 3  
P18283 Glutathione peroxidase 2  
P38646 Stress-70 protein, mitochondrial  
P11021 78 kDa glucose-regulated protein  
P49841 Glycogen synthase kinase-3 beta  
Q03013 Glutathione S-transferase Mu 4  
Q15486 Putative beta-glucuronidase-like protein SMA3  
Q13547 Histone deacetylase 1  
O15379 Histone deacetylase 3  
Q9BY41 Histone deacetylase 8  
P42858 Huntingtin  
Q86Z02 Homeodomain-interacting protein kinase 1  
Q9H2X6 Homeodomain-interacting protein kinase 2  
P09429 High mobility group protein B1  
P61978 Heterogeneous nuclear ribonucleoprotein K

|        |                                                         |
|--------|---------------------------------------------------------|
| P34931 | Heat shock 70 kDa protein 1-like                        |
| P04792 | Heat shock protein beta-1                               |
| Q7Z6Z7 | E3 ubiquitin-protein ligase HUWE1                       |
| Q8WUF5 | RelA-associated inhibitor                               |
| P20042 | Eukaryotic translation initiation factor 2 subunit 2    |
| Q08619 | Interferon-activable protein 205-B                      |
| O14920 | Inhibitor of nuclear factor kappa-B kinase subunit beta |
| Q9UNL4 | Inhibitor of growth protein 4                           |
| Q15181 | Inorganic pyrophosphatase                               |
| Q8N9B5 | Junction-mediating and -regulatory protein              |
| Q14695 | Uncharacterized protein KIAA0087                        |
| Q92831 | Histone acetyltransferase KAT2B                         |
| Q92993 | Histone acetyltransferase KAT5                          |
| Q9H7Z6 | Histone acetyltransferase KAT8                          |
| Q06486 | Casein kinase I isoform delta                           |
| P04183 | Thymidine kinase, cytosolic                             |
| Q16363 | Laminin subunit alpha-4                                 |
| O43261 | Leukemia-associated protein 1                           |
| P03070 | Large T antigen                                         |
| P43356 | Melanoma-associated antigen 2                           |
| Q96M61 | Melanoma-associated antigen B18                         |
| Q9UBF1 | Melanoma-associated antigen C2                          |
| P46821 | Microtubule-associated protein 1B                       |
| Q8IW41 | MAP kinase-activated protein kinase 5                   |
| Q15013 | MAD2L1-binding protein (Caught by MAD2 protein)         |
| P56273 | E3 ubiquitin-protein ligase Mdm2                        |
| O15151 | Protein Mdm4                                            |
| Q15648 | Mediator of RNA polymerase II transcription subunit 1   |
| O00255 | Menin                                                   |
| P45983 | Mitogen-activated protein kinase 8 (MAP kinase 8)       |
| Q15759 | Mitogen-activated protein kinase 11                     |
| P47811 | Mitogen-activated protein kinase 14                     |
| Q9UHC7 | E3 ubiquitin-protein ligase makorin-1                   |



|        |                                                             |
|--------|-------------------------------------------------------------|
| Q03164 | Histone-lysine N-methyltransferase MLL                      |
| Q8IZD2 | Histone-lysine N-methyltransferase MLL5                     |
| Q99547 | M-phase phosphoprotein 6                                    |
| P04731 | Metallothionein-1A                                          |
| P42345 | Serine/threonine-protein kinase mTOR                        |
| P01106 | Myc proto-oncogene protein                                  |
| Q15596 | Nuclear receptor coactivator 2                              |
| P23511 | Nuclear transcription factor Y subunit alpha                |
| P25208 | Nuclear transcription factor Y subunit beta                 |
| P30419 | Glycylpeptide N-tetradecanoyltransferase 1                  |
| O60551 | Glycylpeptide N-tetradecanoyltransferase 2                  |
| Q9Y3T9 | Nucleolar complex protein 2 homolog                         |
| O60936 | Nucleolar protein 3                                         |
| Q9WYW0 | NAD-dependent deacetylase                                   |
| P06748 | Nucleophosmin (NPM)                                         |
| P15559 | NAD(P)H dehydrogenase [quinone] 1                           |
| P22736 | Nuclear receptor subfamily 4 group A member 1               |
| O60285 | NUAK family SNF1-like kinase 1                              |
| P19338 | Nucleolin                                                   |
| Q96G74 | OTU domain-containing protein 5                             |
| P02340 | Cellular tumor antigen p53                                  |
| Q9H3D4 | Tumor protein 63                                            |
| Q15102 | Platelet-activating factor acetylhydrolase IB subunit gamma |
| Q9BTK6 | PAXIP1-associated protein 1                                 |
| P09874 | Poly [ADP-ribose] polymerase 1                              |
| Q9UN74 | Protocadherin alpha-4                                       |
| P35232 | Prohibitin                                                  |
| O75925 | E3 SUMO-protein ligase PIAS1                                |
| O75928 | E3 SUMO-protein ligase PIAS2                                |
| Q8N2W9 | E3 SUMO-protein ligase PIAS4                                |
| Q13526 | Peptidyl-prolyl cis-trans isomerase NIMA-interacting 1      |
| P53350 | Serine/threonine-protein kinase PLK1                        |
| P29590 | Protein PML                                                 |

|        |                                                                  |
|--------|------------------------------------------------------------------|
| P00491 | Purine nucleoside phosphorylase                                  |
| P62136 | Serine/threonine-protein phosphatase PP1-alpha catalytic subunit |
| O00231 | 26S proteasome non-ATPase regulatory subunit 11                  |
| P61289 | Proteasome activator complex subunit 3                           |
| P20338 | Ras-related protein Rab-4A                                       |
| Q06609 | DNA repair protein RAD51 homolog 1                               |
| P61224 | Ras-related protein Rap-1b                                       |
| Q15291 | Retinoblastoma-binding protein 5                                 |
| P06400 | Retinoblastoma-associated protein                                |
| P18754 | Regulator of chromosome condensation                             |
| P27694 | Replication protein A 70 kDa DNA-binding subunit                 |
| Q8NHY2 | E3 ubiquitin-protein ligase RFW2                                 |
| Q13972 | Ras-specific guanine nucleotide-releasing factor 1               |
| Q7LG56 | Ribonucleoside-diphosphate reductase subunit M2 B                |
| P31350 | Ribonucleoside-diphosphate reductase subunit M2                  |
| P62081 | 40S ribosomal protein S7                                         |
| P63162 | Small nuclear ribonucleoprotein-associated protein N             |
| Q8N488 | RING1 and YY1-binding protein                                    |
| P04271 | Protein S100-B                                                   |
| P26447 | Protein S100-A4                                                  |
| Q9UBE0 | SUMO-activating enzyme subunit 1                                 |
| Q15424 | Scaffold attachment factor B1                                    |
| Q14151 | Scaffold attachment factor B2                                    |
| P21673 | Diamine acetyltransferase 1                                      |
| O15126 | Secretory carrier-associated membrane protein 1                  |
| Q8WTS6 | Histone-lysine N-methyltransferase SETD7                         |
| Q96ST3 | Paired amphipathic helix protein Sin3a                           |
| Q96EB6 | NAD-dependent deacetylase sirtuin-1                              |
| Q15796 | Mothers against decapentaplegic homolog 2 (MAD homolog 2)        |
| Q8BUN5 | Mothers against decapentaplegic homolog 3 (MAD homolog 3)        |
| P51532 | Transcription activator BRG1                                     |
| Q16637 | Survival motor neuron protein                                    |
| Q92922 | SWI/SNF complex subunit SMARCC1                                  |

|        |                                                              |
|--------|--------------------------------------------------------------|
| O95863 | Zinc finger protein SNAI1                                    |
| Q9Y675 | SNRPN upstream reading frame protein                         |
| Q53GS9 | U4/U6.U5 tri-snRNP-associated protein 2                      |
| P08047 | Transcription factor Sp1                                     |
| P50453 | Serpin B9                                                    |
| Q12772 | Sterol regulatory element-binding protein 2                  |
| Q96SB4 | SRSF protein kinase 1                                        |
| P49888 | Estrogen sulfotransferase                                    |
| Q15831 | Serine/threonine-protein kinase STK11                        |
| Q13190 | Syntaxin-5                                                   |
| P63165 | Small ubiquitin-related modifier 1 (SUMO-1)                  |
| Q86TM6 | E3 ubiquitin-protein ligase synoviolin                       |
| P49847 | Transcription initiation factor TFIID subunit 6              |
| Q16594 | Transcription initiation factor TFIID subunit 9              |
| P20226 | TATA-box-binding protein                                     |
| P48643 | T-complex protein 1 subunit epsilon                          |
| P13693 | Translationally-controlled tumor protein                     |
| P32780 | General transcription factor IIH subunit 1                   |
| Q8NA92 | THAP domain-containing protein 8                             |
| Q13263 | Transcription intermediary factor 1-beta                     |
| Q96GM8 | Target of EGR1 protein 1                                     |
| Q96KB5 | Lymphokine-activated killer T-cell-originated protein kinase |
| Q9NS56 | E3 ubiquitin-protein ligase Topors                           |
| Q12888 | Tumor suppressor p53-binding protein 1                       |
| Q15672 | Twist-related protein 1                                      |
| P62328 | Thymosin beta-4                                              |
| P0CG47 | Polyubiquitin-B                                              |
| P63279 | SUMO-conjugating enzyme UBC9                                 |
| P0CG48 | Polyubiquitin-C                                              |
| P49459 | Ubiquitin-conjugating enzyme E2 A                            |
| Q05086 | Ubiquitin-protein ligase E3A                                 |
| P51784 | Ubiquitin carboxyl-terminal hydrolase 11                     |
| Q9HBJ7 | Ubiquitin carboxyl-terminal hydrolase 29                     |

|        |                                                             |
|--------|-------------------------------------------------------------|
| Q9H9J4 | Ubiquitin carboxyl-terminal hydrolase 42                    |
| Q93009 | Ubiquitin carboxyl-terminal hydrolase 7                     |
| Q92890 | Ubiquitin fusion degradation protein 1 homolog              |
| P11473 | Vitamin D3 receptor                                         |
| P03120 | Regulatory protein E2                                       |
| P04019 | Protein E6                                                  |
| Q99986 | Serine/threonine-protein kinase VRK1                        |
| Q9C0J8 | pre-mRNA 3' end processing protein WDR33                    |
| Q8TAF3 | WD repeat-containing protein 48                             |
| P61964 | WD repeat-containing protein 5                              |
| Q14191 | Werner syndrome ATP-dependent helicase                      |
| Q9NZC7 | WW domain-containing oxidoreductase                         |
| O14980 | Exportin-1                                                  |
| P55060 | Exportin-2                                                  |
| P18887 | DNA repair protein XRCC11)                                  |
| P12956 | X-ray repair cross-complementing protein 6                  |
| Q96PM9 | Zinc finger protein 385A                                    |
| Q8TBK6 | Zinc finger CCHC domain-containing protein 10               |
| Q96PM5 | RING finger and CHY zinc finger domain-containing protein 1 |
| Q8TAQ5 | Zinc finger protein 420                                     |
| P17028 | Zinc finger protein 24                                      |
| Q6LET9 | LAMA4 protein                                               |
| Q5JYX0 | Cell division control protein 42 homolog                    |
| Q2KN33 | RING finger and CHY zinc finger domain-containing protein 1 |
| Q7Z566 | Activating transcription factor 3                           |
| Q13746 | Bcr-abl mRNA of acute lymphocytic leukaemia (ALL) patients  |
| Q7L7W2 | PP2A B56 gamma 3                                            |
| E1BAP5 | Uncharacterized protein                                     |
| Q81RG7 | Putative uncharacterized protein                            |
| Q9X365 | PXO1-95                                                     |
| Q14DJ8 | Axin-1                                                      |
| Q9DH70 | Large T antigen                                             |
| Q9PST7 | Zinc finger protein XFDL 156                                |

|        |                                          |
|--------|------------------------------------------|
| Q9C0J8 | pre-mRNA 3' end processing protein WDR33 |
| P62979 | Ubiquitin-40S ribosomal protein S27a     |
| P62987 | Ubiquitin-60S ribosomal protein L40      |

## INTERACTOME FOR PAR3

|        |                                                                   |
|--------|-------------------------------------------------------------------|
| P12931 | Proto-oncogene tyrosine-protein kinase Src                        |
| P06241 | Tyrosine-protein kinase Fyn                                       |
| P62993 | Growth factor receptor-bound protein 2                            |
| Q9Z101 | Partitioning defective 6 homolog alpha                            |
| P16333 | Cytoplasmic protein NCK1                                          |
| P19174 | 1-phosphatidylinositol 4,5-bisphosphate phosphodiesterase gamma-1 |
| P00519 | Tyrosine-protein kinase ABL1                                      |
| P46108 | Adapter molecule crk                                              |
| Q8NI35 | InaD-like protein                                                 |

## INTERACTOME FOR PCAF

|          |                                                                                            |
|----------|--------------------------------------------------------------------------------------------|
| P22415   | Upstream stimulatory factor 1                                                              |
| P23511   | Nuclear transcription factor Y subunit alpha                                               |
| Q9EPK5   | WW domain-containing transcription regulator protein 1                                     |
| O75529   | TAF5-like RNA polymerase II p300/CBP-associated factor-associated factor 65 kDa subunit 5L |
| q16514-1 | Transcription initiation factor TFIID subunit 12                                           |
| Q9Y6J9   | TAF6-like RNA polymerase II p300/CBP-associated factor-associated factor 65 kDa subunit 6L |
| Q86YP4   | Transcriptional repressor p66-alpha                                                        |
| O75478   | Transcriptional adapter 2-alpha                                                            |
| Q8WXI9   | Transcriptional repressor p66-beta                                                         |
| O75486   | Transcription initiation protein SPT3 homolog                                              |
| Q12962   | Transcription initiation factor TFIID subunit 10                                           |
| Q92830   | Histone acetyltransferase KAT2A                                                            |
| O75528   | Transcriptional adapter 3                                                                  |
| Q09472   | Histone acetyltransferase p300                                                             |
| Q16594   | Transcription initiation factor TFIID subunit 9                                            |
| P26358   | DNA (cytosine-5)-methyltransferase 1                                                       |
| Q15672   | Twist-related protein 1                                                                    |
| P15172   | Myoblast determination protein 1                                                           |
| Q92793   | CREB-binding protein                                                                       |
| Q01094   | Transcription factor E2F1                                                                  |
| P84040   | Histone H4                                                                                 |
| P02299   | Histone H3                                                                                 |
| P06400   | Retinoblastoma-associated protein                                                          |
| P31749   | AKT1                                                                                       |
| P04637   | p53                                                                                        |
| P03255   | Early E1A 32 kDa protein                                                                   |
| Q16665   | Hypoxia-inducible factor 1-alpha                                                           |
| Q96EB6   | NAD-dependent deacetylase sirtuin-1                                                        |
| P06790   | Regulatory protein E2                                                                      |
| O12161   | Protein Tat                                                                                |

|        |                                                              |
|--------|--------------------------------------------------------------|
| P03129 | Protein E7                                                   |
| Q04206 | Transcription factor p65                                     |
| O60566 | Mitotic checkpoint serine/threonine-protein kinase BUB1 beta |
| P16104 | Histone H2A.x                                                |



## INTERACTOME FOR PDGFR

|        |                                                                   |
|--------|-------------------------------------------------------------------|
| P09619 | Platelet-derived growth factor receptor beta                      |
| P42229 | Signal transducer and activator of transcription 5A               |
| P27986 | Phosphatidylinositol 3-kinase regulatory subunit alpha            |
| P20936 | Ras GTPase-activating protein 1                                   |
| P62993 | Growth factor receptor-bound protein 2                            |
| Q9Y2R2 | Tyrosine-protein phosphatase non-receptor type 22                 |
| P23469 | Receptor-type tyrosine-protein phosphatase epsilon                |
| Q15256 | Receptor-type tyrosine-protein phosphatase R                      |
| Q16827 | Receptor-type tyrosine-protein phosphatase O                      |
| P23467 | Receptor-type tyrosine-protein phosphatase beta                   |
| P08575 | Receptor-type tyrosine-protein phosphatase C                      |
| P29350 | Tyrosine-protein phosphatase non-receptor type 6                  |
| P19174 | 1-phosphatidylinositol 4,5-bisphosphate phosphodiesterase gamma-1 |
| P01127 | Platelet-derived growth factor subunit B                          |
| P23470 | Receptor-type tyrosine-protein phosphatase gamma                  |
| P18031 | Tyrosine-protein phosphatase non-receptor type 1                  |
| Q12913 | Receptor-type tyrosine-protein phosphatase eta                    |
| Q05209 | Tyrosine-protein phosphatase non-receptor type 12                 |
| Q15262 | Receptor-type tyrosine-protein phosphatase kappa                  |
| Q00944 | Focal adhesion kinase 1                                           |
| P00519 | Tyrosine-protein kinase ABL1                                      |
| O00750 | PIK3C2B                                                           |
| Q9BQ66 | Keratin-associated protein 4-12                                   |
| P25020 | Tyrosine-protein kinase transforming protein Src                  |
| P0CK45 | Protein E5                                                        |
| O00459 | PIK3R2                                                            |
| P19174 | 1-phosphatidylinositol 4,5-bisphosphate phosphodiesterase gamma-1 |
| P07947 | Tyrosine-protein kinase Yes                                       |
| O43639 | Cytoplasmic protein NCK2                                          |
| P46108 | Adapter molecule crk                                              |

|        |                                                   |
|--------|---------------------------------------------------|
| P41499 | Tyrosine-protein phosphatase non-receptor type 11 |
| Q13239 | Src-like-adapter                                  |
| O14492 | SH2B adapter protein 2                            |
| P06241 | Tyrosine-protein kinase Fyn                       |
| P16333 | Cytoplasmic protein NCK1                          |
| P22681 | E3 ubiquitin-protein ligase CBL                   |
| P23956 | V-type proton ATPase 16 kDa proteolipid subunit   |
| Q13322 | Growth factor receptor-bound protein 10           |
| Q14451 | Growth factor receptor-bound protein 7            |
| Q15599 | Na(+)/H(+) exchange regulatory cofactor NHE-RF2   |
| Q28619 | Na(+)/H(+) exchange regulatory cofactor NHE-RF1   |
| P60484 | PTEN                                              |

## INTERACTOME FOR PEROXIREDOXIN

|        |                                                                                               |
|--------|-----------------------------------------------------------------------------------------------|
| Q3KTM2 | Glycerophosphodiester phosphodiesterase domain-containing protein 5                           |
| Q00005 | Serine/threonine-protein phosphatase 2A 55 kDa regulatory subunit B beta isoform              |
| Q9HCK5 | Protein argonaute-4                                                                           |
| Q6UXB4 | C-type lectin domain family 4 member G                                                        |
| P68587 | Yop proteins translocation protein P                                                          |
| Q6FG91 | GABA(A) receptor-associated protein-like 2, isoform CRA_b                                     |
| P43351 | DNA repair protein RAD52 homolog                                                              |
| Q9NQ29 | Putative RNA-binding protein Luc7-like 1                                                      |
| Q96GL3 | IRF3 protein                                                                                  |
| P30154 | Serine/threonine-protein phosphatase 2A 65 kDa regulatory subunit A beta isoform              |
| Q9H492 | Microtubule-associated proteins 1A/1B light chain 3A                                          |
| Q9GZQ8 | Microtubule-associated proteins 1A/1B light chain 3B                                          |
| O95166 | Gamma-aminobutyric acid receptor-associated protein                                           |
| Q9H0R8 | Gamma-aminobutyric acid receptor-associated protein-like 1                                    |
| P11766 | Alcohol dehydrogenase class-3                                                                 |
| Q9Y572 | Receptor-interacting serine/threonine-protein kinase 3                                        |
| Q96GM5 | SWI/SNF-related matrix-associated actin-dependent regulator of chromatin subfamily D member 1 |
| O14796 | SH2 domain-containing protein 1B                                                              |
| Q15051 | IQ calmodulin-binding motif-containing protein 1                                              |
| Q13162 | Peroxiredoxin-4                                                                               |
| P30153 | Serine/threonine-protein phosphatase 2A 65 kDa regulatory subunit A alpha isoform             |
| P04406 | Glyceraldehyde-3-phosphate dehydrogenase                                                      |
| Q99836 | Myeloid differentiation primary response protein MyD88                                        |
| P01106 | Myc proto-oncogene protein                                                                    |
| P10275 | Androgen receptor                                                                             |
| Q9Y297 | F-box/WD repeat-containing protein 1A                                                         |
| P00533 | Epidermal growth factor receptor                                                              |
| P62993 | Growth factor receptor-bound protein 2                                                        |
| P10599 | Thioredoxin                                                                                   |
| P60484 | PTEN                                                                                          |

Q7Z5G6

IRF3 protein

P00519

Tyrosine-protein kinase ABL1

Q16186

Proteasomal ubiquitin receptor ADRM1

## INTERACTOME FOR PICT1

|        |                                                                  |
|--------|------------------------------------------------------------------|
| Q8IY92 | Structure-specific endonuclease subunit SLX4                     |
| Q5NEP4 | Hypothetical membrane protein                                    |
| Q81T55 | D-isomer specific 2-hydroxyacid dehydrogenase family protein     |
| Q9X365 | PXO1-95                                                          |
| Q81WS3 | Arylsulfatase                                                    |
| Q7CGW9 | Putative uncharacterized protein                                 |
| Q8ZFX5 | Histidinol dehydrogenase                                         |
| P54257 | Huntingtin-associated protein 1                                  |
| Q70EL2 | Ubiquitin carboxyl-terminal hydrolase 45                         |
| Q96RL1 | BRCA1-A complex subunit RAP80                                    |
| Q81Z87 | Chitinase B                                                      |
| P62136 | Serine/threonine-protein phosphatase PP1-alpha catalytic subunit |
| Q00987 | E3 ubiquitin-protein ligase Mdm2                                 |

## INTERACTOME FOR PREX2

|        |                                                                  |
|--------|------------------------------------------------------------------|
| P63000 | RAC1                                                             |
| P60953 | CDC42                                                            |
| P31749 | AKT1                                                             |
| P42345 | mTOR                                                             |
| Q9NR83 | SLC2A4 regulator                                                 |
| Q9JHK5 | Pleckstrin                                                       |
| Q7KZI7 | Serine/threonine-protein kinase MARK2                            |
| P21730 | C5a anaphylatoxin chemotactic receptor                           |
| Q96I99 | Succinyl-CoA ligase [GDP-forming] subunit beta, mitochondrial    |
| P62873 | Guanine nucleotide-binding protein G(I)/G(S)/G(T) subunit beta-1 |
| P62136 | Serine/threonine-protein phosphatase PP1-alpha catalytic subunit |
| P01106 | Myc proto-oncogene protein                                       |
| Q15796 | SMAD2                                                            |

## **INTERACTOME FOR RAK**

|        |                                   |
|--------|-----------------------------------|
| P60484 | PTEN                              |
| P06400 | Retinoblastoma-associated protein |
| P63000 | RAC1                              |
| Q8IZP0 | Abl interactor 1                  |

## INTERACTOME FOR SHARPIN

|        |                                                            |
|--------|------------------------------------------------------------|
| P01583 | Interleukin-1 alpha                                        |
| P17301 | Integrin alpha-2                                           |
| P08648 | Integrin alpha-5                                           |
| Q99757 | Thioredoxin, mitochondrial                                 |
| P05556 | Integrin beta-1                                            |
| P18101 | Ubiquitin-60S ribosomal protein L40                        |
| Q9BYM8 | RanBP-type and C3HC4-type zinc finger-containing protein 1 |
| Q96EP0 | RING finger protein 31                                     |



## INTERACTOME FOR SMAD2

|        |                                                                                   |
|--------|-----------------------------------------------------------------------------------|
| P30153 | Serine/threonine-protein phosphatase 2A 65 kDa regulatory subunit A alpha isoform |
| Q969K4 | Ankyrin repeat and BTB/POZ domain-containing protein 1                            |
| P05141 | ADP/ATP translocase 2                                                             |
| P12236 | ADP/ATP translocase 3                                                             |
| P55196 | Afadin                                                                            |
| Q9ULX6 | A-kinase anchor protein 8-like                                                    |
| P84996 | Protein ALEX                                                                      |
| P55789 | FAD-linked sulfhydryl oxidase ALR                                                 |
| P30533 | Alpha-2-macroglobulin receptor-associated protein                                 |
| Q92688 | Acidic leucine-rich nuclear phosphoprotein 32 family member B                     |
| Q9BTT0 | Acidic leucine-rich nuclear phosphoprotein 32 family member E                     |
| Q9UJX6 | Anaphase-promoting complex subunit 2                                              |
| Q12955 | Ankyrin-3                                                                         |
| P58335 | Anthrax toxin receptor 2                                                          |
| P05023 | Sodium/potassium-transporting ATPase subunit alpha-1                              |
| P05026 | Sodium/potassium-transporting ATPase subunit beta-1                               |
| P56385 | ATP synthase subunit e, mitochondrial                                             |
| Q9NRL2 | Bromodomain adjacent to zinc finger domain protein 1A                             |
| Q9NWK9 | Box C/D snoRNA protein 1                                                          |
| Q00994 | Protein BEX3                                                                      |
| Q9BX70 | BTB/POZ domain-containing protein 2                                               |
| P62158 | Calmodulin                                                                        |
| Q92793 | CREB-binding protein                                                              |
| Q86WR0 | Coiled-coil domain-containing protein 25                                          |
| P10809 | 60 kDa heat shock protein, mitochondrial                                          |
| Q9NSE2 | Cytokine-inducible SH2-containing protein                                         |
| P09496 | Clathrin light chain A                                                            |
| P05108 | Cholesterol side-chain cleavage enzyme, mitochondrial                             |
| P01243 | Chorionic somatomammotropin hormone                                               |
| Q92905 | COP9 signalosome complex subunit 5                                                |

|        |                                                                    |
|--------|--------------------------------------------------------------------|
| Q93034 | Cullin-5                                                           |
| Q9BVG4 | UPF0368 protein Cxorf26                                            |
| O14576 | Cytoplasmic dynein 1 intermediate chain 1                          |
| P61962 | DDB1- and CUL4-associated factor 7                                 |
| Q96GG9 | DCN1-like protein 1                                                |
| Q92499 | ATP-dependent RNA helicase DDX1                                    |
| Q14562 | ATP-dependent RNA helicase DHX8                                    |
| Q92988 | Homeobox protein DLX-4                                             |
| O60884 | DnaJ homolog subfamily A member 2                                  |
| Q99615 | DnaJ homolog subfamily C member 7                                  |
| Q8NF50 | Dedicator of cytokinesis protein 8                                 |
| Q9BZ29 | Dedicator of cytokinesis protein 9                                 |
| Q8N608 | Inactive dipeptidyl peptidase 10                                   |
| P68104 | Elongation factor 1-alpha 1                                        |
| O15371 | Eukaryotic translation initiation factor 3 subunit D               |
| Q9Y262 | Eukaryotic translation initiation factor 3 subunit L               |
| Q09472 | Histone acetyltransferase p300                                     |
| O15197 | Ephrin type-B receptor 6 (HEP)                                     |
| P19447 | TFIIH basal transcription factor complex helicase XPB subunit      |
| Q9H501 | ESF1 homolog                                                       |
| P50502 | Hsc70-interacting protein                                          |
| Q96MY7 | Protein FAM161B                                                    |
| A6ND36 | Protein FAM83G                                                     |
| P01100 | Proto-oncogene c-Fos                                               |
| P14136 | Glia fibrillary acidic protein                                     |
| Q92769 | Histone deacetylase 2                                              |
| Q5T447 | E3 ubiquitin-protein ligase HECTD3                                 |
| Q15651 | High mobility group nucleosome-binding domain-containing protein 3 |
| P08107 | Heat shock 70 kDa protein 1A/1B                                    |
| O60841 | Eukaryotic translation initiation factor 5B )                      |
| Q14240 | Eukaryotic initiation factor 4A-II                                 |
| Q9NWB7 | Intraflagellar transport protein 57 homolog                        |
| O15111 | Inhibitor of nuclear factor kappa-B kinase subunit alpha           |

|        |                                                                             |
|--------|-----------------------------------------------------------------------------|
| Q9NPH3 | Interleukin-1 receptor accessory protein )                                  |
| Q14974 | Importin subunit beta-1                                                     |
| P05412 | Transcription factor AP-1                                                   |
| Q2LD37 | Uncharacterized protein KIAA1109                                            |
| P10644 | cAMP-dependent protein kinase type I-alpha regulatory subunit               |
| Q07666 | KH domain-containing, RNA-binding, signal transduction-associated protein 1 |
| P33176 | Kinesin-1 heavy chain                                                       |
| Q13887 | Krueppel-like factor 5                                                      |
| O15230 | Laminin subunit alpha-5                                                     |
| Q9WUH2 | LIM/homeobox protein Lhx9                                                   |
| Q9Y2U8 | Inner nuclear membrane protein Man1                                         |
| O15068 | Guanine nucleotide exchange factor DBS                                      |
| Q96RN5 | Mediator of RNA polymerase II transcription subunit 15                      |
| O75448 | Mediator of RNA polymerase II transcription subunit 24                      |
| O75586 | Mediator of RNA polymerase II transcription subunit 6                       |
| Q9NXB0 | Meckel syndrome type 1 protein                                              |
| Q9NZJ7 | Mitochondrial carrier homolog 1                                             |
| Q9NYA4 | Myotubularin-related protein 4                                              |
| Q92614 | Unconventional myosin-XVIIIa                                                |
| Q9Y4I1 | Unconventional myosin-Va                                                    |
| Q9UJ70 | N-acetyl-D-glucosamine kinase                                               |
| Q14919 | Dr1-associated corepressor                                                  |
| Q14686 | Nuclear receptor coactivator 6                                              |
| Q96SB3 | Neurabin-2                                                                  |
| Q96PU5 | E3 ubiquitin-protein ligase NEDD4-like                                      |
| P07197 | Neurofilament medium polypeptide                                            |
| P55209 | Nucleosome assembly protein 1-like 1                                        |
| Q8TAK6 | Oligodendrocyte transcription factor 1                                      |
| Q13438 | Protein OS-9                                                                |
| P04637 | Cellular tumor antigen p53                                                  |
| Q9H3D4 | Tumor protein 63 (p63)                                                      |
| Q8WXI9 | Transcriptional repressor p66-beta                                          |
| P51003 | Poly(A) polymerase alpha                                                    |

|        |                                                                                     |
|--------|-------------------------------------------------------------------------------------|
| Q6ZW49 | PAX-interacting protein 1                                                           |
| P40855 | Peroxisomal biogenesis factor 19                                                    |
| O60664 | Perilipin-3                                                                         |
| Q70Z35 | Phosphatidylinositol 3,4,5-trisphosphate-dependent Rac exchanger 2 protein (P-Rex2) |
| O00231 | 26S proteasome non-ATPase regulatory subunit 11                                     |
| P48556 | 26S proteasome non-ATPase regulatory subunit 8                                      |
| Q8WXF1 | Paraspeckle component 1                                                             |
| P20962 | Parathymosin                                                                        |
| P27708 | CAD protein                                                                         |
| Q9H6Z4 | Ran-binding protein 3                                                               |
| Q96S59 | Ran-binding protein 9                                                               |
| P62826 | GTP-binding nuclear protein Ran                                                     |
| P10826 | Retinoic acid receptor beta                                                         |
| Q8IUD2 | ELKS/Rab6-interacting/CAST family member 1                                          |
| Q96LT9 | RNA-binding protein 40                                                              |
| Q9D8T3 | GTPase RhebL1                                                                       |
| P61586 | Transforming protein RhoA                                                           |
| P97348 | Rho-related GTP-binding protein RhoD                                                |
| Q86UR5 | Regulating synaptic membrane exocytosis protein 1                                   |
| Q13671 | Ras and Rab interactor 1                                                            |
| P62888 | 60S ribosomal protein L30                                                           |
| P62987 | Ubiquitin-60S ribosomal protein L40                                                 |
| P32969 | 60S ribosomal protein L9                                                            |
| Q5XPI4 | E3 ubiquitin-protein ligase RNF123                                                  |
| O60518 | Ran-binding protein 6 (RanBP6)                                                      |
| P51991 | Heterogeneous nuclear ribonucleoprotein A3 (hnRNP A3)                               |
| Q13464 | Rho-associated protein kinase 1                                                     |
| P05423 | DNA-directed RNA polymerase III subunit RPC4                                        |
| Q969S9 | Ribosome-releasing factor 2, mitochondrial                                          |
| P62263 | 40S ribosomal protein S14                                                           |
| P61247 | 40S ribosomal protein S3a                                                           |
| Q96T23 | Remodeling and spacing factor 1                                                     |
| P08621 | U1 small nuclear ribonucleoprotein 70 kDa                                           |

|        |                                                           |
|--------|-----------------------------------------------------------|
| P19793 | Retinoic acid receptor RXR-alpha                          |
| P07602 | Proactivator polypeptide                                  |
| Q9BW04 | Specifically androgen-regulated gene protein              |
| P05060 | Secretogranin-1                                           |
| Q9H2E6 | Semaphorin-6A                                             |
| Q9HC62 | Sentrin-specific protease 2                               |
| Q13435 | Splicing factor 3B subunit 2                              |
| P12757 | Ski-like protein                                          |
| P12755 | Ski oncogene                                              |
| P84022 | Mothers against decapentaplegic homolog 3 (MAD homolog 3) |
| Q13485 | Mothers against decapentaplegic homolog 4 (MAD homolog 4) |
| O15198 | Mothers against decapentaplegic homolog 9 (MAD homolog 9) |
| Q92922 | SWI/SNF complex subunit SMARCC1                           |
| Q9HCE7 | E3 ubiquitin-protein ligase SMURF1                        |
| Q9HAU4 | E3 ubiquitin-protein ligase SMURF2                        |
| O95295 | SNARE-associated protein Snapin                           |
| Q13573 | SNW domain-containing protein 1                           |
| P00441 | Superoxide dismutase                                      |
| P30626 | Sorcin                                                    |
| Q8N0X7 | Spartin                                                   |
| Q7KZ85 | Transcription elongation factor SPT6                      |
| Q9Y6N5 | Sulfide:quinone oxidoreductase, mitochondrial             |
| Q9BX66 | Sorbin and SH3 domain-containing protein 1                |
| Q05519 | Serine/arginine-rich splicing factor 11                   |
| Q13243 | Serine/arginine-rich splicing factor 5                    |
| Q9NQ55 | Suppressor of SWI4 1 homolog                              |
| P78524 | Suppression of tumorigenicity 5 protein                   |
| O75683 | Surfeit locus protein 6                                   |
| P21579 | Synaptotagmin-1                                           |
| Q5VWG9 | Transcription initiation factor TFIID subunit 3           |
| P68363 | Tubulin alpha-1B chain                                    |
| P68366 | Tubulin alpha-4A chain                                    |
| Q86TI0 | TBC1 domain family member 1                               |

|        |                                                      |
|--------|------------------------------------------------------|
| Q6IPX3 | Transcription elongation factor A protein-like 6     |
| P40227 | T-complex protein 1 subunit zeta                     |
| P13693 | Translationally-controlled tumor protein             |
| P54274 | Telomeric repeat-binding factor 1                    |
| Q12800 | Alpha-globin transcription factor CP2                |
| P36897 | TGF-beta receptor type-1                             |
| P21980 | Protein-glutamine gamma-glutamyltransferase 2        |
| Q9UPQ9 | Trinucleotide repeat-containing gene 6B protein      |
| P11387 | DNA topoisomerase 1                                  |
| P12270 | Nucleoprotein TPR                                    |
| Q9UPN9 | E3 ubiquitin-protein ligase TRIM33                   |
| Q9BVG3 | Tripartite motif-containing protein 62               |
| Q9H2G4 | Testis-specific Y-encoded-like protein 2             |
| P25490 | Transcriptional repressor protein YY1                |
| O75643 | U5 small nuclear ribonucleoprotein 200 kDa helicase  |
| O95071 | E3 ubiquitin-protein ligase UBR5                     |
| P70398 | Probable ubiquitin carboxyl-terminal hydrolase FAF-X |
| Q9Y5K8 | V-type proton ATPase subunit D                       |
| Q2M389 | WASH complex subunit 7                               |
| O00308 | NEDD4-like E3 ubiquitin-protein ligase WWP2          |
| O60315 | Zinc finger E-box-binding homeobox 2                 |
| Q9H2Y7 | Zinc finger protein 106 homolog                      |
| Q96KR1 | Zinc finger RNA-binding protein                      |
| O95405 | Zinc finger FYVE domain-containing protein 9         |
| Q15326 | Zinc finger MYND domain-containing protein 11        |
| P51814 | Zinc finger protein 41                               |
| Q15227 | Pregnancy specific beta-1-glycoprotein 9             |
| Q9H5C5 | CDNA: FLJ23584 fis, clone LNG14307                   |
| Q5RKT7 | Ribosomal protein S27a                               |
| Q13484 | Ankyrin G119                                         |
| Q8N6E6 | C21orf66 protein                                     |
| Q9NRC3 | Cytoplasmic dynein heavy chain (Fragment)            |
| Q96T67 | TOB3                                                 |

Q9CQB1

ADP-ribosylation factor 4-like (ADP-ribosylation factor-like 4D) (ADP-ribosylation factor-like protein 4D)

## INTERACTOME FOR SMAD3

|        |                                                                                   |
|--------|-----------------------------------------------------------------------------------|
| P30153 | Serine/threonine-protein phosphatase 2A 65 kDa regulatory subunit A alpha isoform |
| P11171 | Protein 4.1                                                                       |
| Q9NY61 | Protein AATF                                                                      |
| P60709 | Actin, cytoplasmic 1                                                              |
| Q9HDC9 | Adipocyte plasma membrane-associated protein                                      |
| P04114 | Apolipoprotein B-100                                                              |
| O60563 | Cyclin-T1                                                                         |
| P17676 | CCAAT/enhancer-binding protein beta (C/EBP beta)                                  |
| P08603 | Complement factor H                                                               |
| Q9UEE9 | Craniofacial development protein 1                                                |
| O15519 | CASP8 and FADD-like apoptosis regulator                                           |
| Q9H2X0 | Chordin                                                                           |
| Q7Z3E2 | Uncharacterized protein C10orf118                                                 |
| O75746 | Calcium-binding mitochondrial carrier protein Aralar1                             |
| P31146 | Coronin-1A                                                                        |
| P05108 | Cholesterol side-chain cleavage enzyme, mitochondrial                             |
| P46108 | Adapter molecule crk                                                              |
| Q7LFL8 | CXXC-type zinc finger protein 5                                                   |
| Q9UI36 | Dachshund homolog 1                                                               |
| P61962 | DDB1- and CUL4-associated factor 7                                                |
| P11926 | Ornithine decarboxylase                                                           |
| O75618 | Death effector domain-containing protein                                          |
| Q14562 | ATP-dependent RNA helicase DHX8                                                   |
| O60884 | DnaJ homolog subfamily A member 2                                                 |
| Q9UDY4 | DnaJ homolog subfamily B member 4                                                 |
| Q9BZ29 | Dedicator of cytokinesis protein 9                                                |
| P51141 | Segment polarity protein dishevelled homolog DVL-1                                |
| Q99814 | Endothelial PAS domain-containing protein 1                                       |
| A6ND36 | Protein FAM83G                                                                    |
| P23142 | Fibulin-1                                                                         |



|        |                                                                      |
|--------|----------------------------------------------------------------------|
| P21333 | Filamin-A                                                            |
| O43524 | Forkhead box protein O3                                              |
| P35573 | Glycogen debranching enzyme                                          |
| Q9H7M9 | Platelet receptor Gi24                                               |
| Q14161 | ARF GTPase-activating protein GIT2                                   |
| Q5TA50 | Glycolipid transfer protein domain-containing protein 1              |
| Q9Y692 | Glucocorticoid modulatory element-binding protein 1                  |
| P62993 | Growth factor receptor-bound protein 2                               |
| Q9UHL9 | General transcription factor II-I repeat domain-containing protein 1 |
| Q9Y5J3 | Hairy/enhancer-of-split related with YRPW motif protein 1            |
| Q9NQ87 | Hairy/enhancer-of-split related with YRPW motif-like protein         |
| P61978 | Heterogeneous nuclear ribonucleoprotein K                            |
| P00738 | Haptoglobin                                                          |
| P08107 | Heat shock 70 kDa protein 1A/1B                                      |
| Q9UBH0 | Interleukin-36 receptor antagonist protein                           |
| O15111 | Inhibitor of nuclear factor kappa-B kinase subunit alpha             |
| Q14213 | Interleukin-27 subunit beta                                          |
| Q9NZH6 | Interleukin-37                                                       |
| P35568 | Insulin receptor substrate 1                                         |
| P61371 | Insulin gene enhancer protein ISL-1                                  |
| Q9HDC5 | Junctophilin-1                                                       |
| Q8WXH2 | Junctophilin-3                                                       |
| P13645 | Keratin, type I cytoskeletal 10                                      |
| P35908 | Keratin, type II cytoskeletal 2 epidermal                            |
| Q7Z3B3 | KAT8 regulatory NSL complex subunit 1                                |
| Q9Y2K7 | Lysine-specific demethylase 2A                                       |
| Q9P2J3 | Kelch-like protein 9                                                 |
| Q80TH2 | Protein LAP2                                                         |
| P18428 | Lipopolysaccharide-binding protein                                   |
| P02545 | Prelamin-A/C [Cleaved into: Lamin-A/C                                |
| Q9Y2U8 | Inner nuclear membrane protein Man1                                  |
| O60318 | 80 kDa MCM3-associated protein                                       |
| Q96RN5 | Mediator of RNA polymerase II transcription subunit 15               |

|        |                                                                                                                              |
|--------|------------------------------------------------------------------------------------------------------------------------------|
| P28482 | Mitogen-activated protein kinase 1                                                                                           |
| Q9UMN6 | Histone-lysine N-methyltransferase MLL4                                                                                      |
| P30304 | M-phase inducer phosphatase 1                                                                                                |
| Q9Y483 | Metal-response element-binding transcription factor 2                                                                        |
| Q9NYA4 | Myotubularin-related protein 4                                                                                               |
| Q99836 | Myeloid differentiation primary response protein MyD88                                                                       |
| Q9ULV0 | Unconventional myosin-Vb                                                                                                     |
| Q14686 | Nuclear receptor coactivator 6                                                                                               |
| Q01705 | Neurogenic locus notch homolog protein 1 (Notch 1)                                                                           |
| P22736 | Nuclear receptor subfamily 4 group A member 1                                                                                |
| O88898 | Tumor protein 63                                                                                                             |
| P09466 | Glycodelin                                                                                                                   |
| O08675 | Proteinase-activated receptor 3 (PAR-3)                                                                                      |
| Q9UKK3 | Poly [ADP-ribose] polymerase 4                                                                                               |
| Q08174 | Protocadherin-1                                                                                                              |
| Q16822 | Phosphoenolpyruvate carboxykinase                                                                                            |
| Q13526 | Peptidyl-prolyl cis-trans isomerase NIMA-interacting 1                                                                       |
| Q8NG27 | E3 ubiquitin-protein ligase Praja-1                                                                                          |
| Q6DJT9 | Zinc finger protein PLAG1 (Pleiomorphic adenoma gene 1 protein)                                                              |
| Q9UM63 | Zinc finger protein PLAGL1 (Lost on transformation 1) (LOT-1)<br>(Pleiomorphic adenoma-like protein 1) (Tumor supressor ZAC) |
| P00747 | Plasminogen                                                                                                                  |
| Q9BZL4 | Protein phosphatase 1 regulatory subunit 12C                                                                                 |
| Q9UKN5 | PR domain zinc finger protein 4                                                                                              |
| Q92786 | Prospero homeobox protein 1                                                                                                  |
| P24158 | Myeloblastin                                                                                                                 |
| O00231 | 26S proteasome non-ATPase regulatory subunit 11                                                                              |
| Q8WXF1 | Paraspeckle component 1                                                                                                      |
| P06737 | Glycogen phosphorylase, liver form                                                                                           |
| Q9H6Z4 | Ran-binding protein 3                                                                                                        |
| Q96S59 | Ran-binding protein 9                                                                                                        |
| P35243 | Recoverin                                                                                                                    |
| P27694 | Replication protein A 70 kDa DNA-binding subunit                                                                             |

|        |                                                             |
|--------|-------------------------------------------------------------|
| Q9BXF6 | Rab11 family-interacting protein 5                          |
| Q9BVS4 | Serine/threonine-protein kinase RIO2                        |
| P39023 | 60S ribosomal protein L3                                    |
| P36578 | 60S ribosomal protein L4                                    |
| P05388 | 60S acidic ribosomal protein P0                             |
| Q96EP0 | RING finger protein 31                                      |
| Q86UC2 | Radial spoke head protein 3 homolog                         |
| P08621 | U1 small nuclear ribonucleoprotein 70 kDa                   |
| Q9BW04 | Specifically androgen-regulated gene protein                |
| Q9BYW2 | Histone-lysine N-methyltransferase SETD2                    |
| Q15459 | Splicing factor 3A subunit 1                                |
| Q9UJ37 | Alpha-N-acetylgalactosaminide alpha-2,6-sialyltransferase 2 |
| P12757 | Ski-like protein                                            |
| P12755 | Ski oncogene                                                |
| Q15796 | SMAD2                                                       |
| Q8BUN5 | SMAD3                                                       |
| Q13485 | SMAD\$                                                      |
| Q9HCE7 | E3 ubiquitin-protein ligase SMURF1                          |
| Q9HAU4 | E3 ubiquitin-protein ligase SMURF2                          |
| Q13573 | SNW domain-containing protein 1                             |
| Q9H0E3 | Histone deacetylase complex subunit SAP130                  |
| Q9Y6N5 | Sulfide:quinone oxidoreductase, mitochondrial               |
| Q13501 | Sequestosome-1                                              |
| Q12772 | Sterol regulatory element-binding protein 2                 |
| Q9UHV2 | SERTA domain-containing protein 1                           |
| Q05066 | Sex-determining region Y protein                            |
| Q9Y3Q8 | TSC22 domain family protein 4                               |
| Q92844 | TRAF family member-associated NF-kappa-B activator          |
| P17987 | T-complex protein 1 subunit alpha                           |
| Q04206 | Transcription factor p65                                    |
| P21980 | Protein-glutamine gamma-glutamyltransferase 2               |
| O00206 | Toll-like receptor 4                                        |
| Q13445 | Transmembrane emp24 domain-containing protein 1             |

|        |                                                                                    |
|--------|------------------------------------------------------------------------------------|
| P06753 | Tropomyosin alpha-3 chain                                                          |
| P02787 | Serotransferrin                                                                    |
| Q9UPN9 | E3 ubiquitin-protein ligase TRIM33                                                 |
| O95551 | Tyrosyl-DNA phosphodiesterase 2                                                    |
| P25490 | Transcriptional repressor protein YY1                                              |
| Q93009 | Ubiquitin carboxyl-terminal hydrolase 7                                            |
| P70398 | Probable ubiquitin carboxyl-terminal hydrolase FAF-X                               |
| P52735 | Guanine nucleotide exchange factor VAV2 (VAV-2)                                    |
| P08670 | Vimentin                                                                           |
| P47810 | Wee1-like protein kinase                                                           |
| O00308 | NEDD4-like E3 ubiquitin-protein ligase WWP2                                        |
| P12956 | X-ray repair cross-complementing protein 6                                         |
| Q05516 | Zinc finger and BTB domain-containing protein 16                                   |
| Q5D1E8 | Ribonuclease ZC3H12A                                                               |
| Q8WYQ9 | Zinc finger CCHC domain-containing protein 14                                      |
| Q9NPG8 | Probable palmitoyltransferase ZDHHC4                                               |
| O60315 | Zinc finger E-box-binding homeobox 2                                               |
| P15822 | Zinc finger protein 40                                                             |
| O95405 | Zinc finger FYVE domain-containing protein 9                                       |
| Q15326 | Zinc finger MYND domain-containing protein 11                                      |
| Q86UD4 | Zinc finger protein 329                                                            |
| P51522 | Zinc finger protein 83                                                             |
| P78451 | Somatomammotropin                                                                  |
| Q13484 | Ankyrin G119                                                                       |
| Q96RS2 | Laminin receptor-like protein LAMRL5                                               |
| Q86YA9 | ADP-ribosylation factor-binding protein GGA1                                       |
| Q8NBT9 | Sushi, von Willebrand factor type A, EGF and pentraxin domain-containing protein 1 |

## INTERACTOME FOR STK11

|        |                                                                 |
|--------|-----------------------------------------------------------------|
| Q7RTN6 | STE20-related kinase adapter protein alpha                      |
| Q99LC8 | Translation initiation factor eIF-2B subunit alpha              |
| Q96CW1 | AP-2 complex subunit mu                                         |
| Q9Y376 | Calcium-binding protein 39                                      |
| Q9H6T3 | RNA polymerase II-associated protein 3                          |
| Q15831 | STK11                                                           |
| Q9NNW5 | WD repeat-containing protein 6                                  |
| Q8NFZ5 | TNFAIP3-interacting protein 2                                   |
| Q9C0K7 | STE20-related kinase adapter protein beta                       |
| Q96L34 | MAP/microtubule affinity-regulating kinase 4                    |
| Q8TAF3 | WD repeat-containing protein 48                                 |
| Q81LC5 | Glutamyl-tRNA reductase                                         |
| Q16543 | Hsp90 co-chaperone Cdc37                                        |
| Q7CG03 | Metalloprotease                                                 |
| Q9H9S4 | Calcium-binding protein 39-like                                 |
| Q13451 | Peptidyl-prolyl cis-trans isomerase FKBP5                       |
| P48059 | LIM and senescent cell antigen-like-containing domain protein 1 |
| Q02241 | Kinesin-like protein KIF23                                      |
| Q92922 | SWI/SNF complex subunit SMARCC1                                 |
| P51784 | Ubiquitin carboxyl-terminal hydrolase 11                        |
| O60285 | NUAK family SNF1-like kinase 1                                  |
| P08107 | Heat shock 70 kDa protein 1A/1B                                 |
| Q9Y3A3 | MOB-like protein phocein                                        |
| P51532 | Transcription activator BRG1                                    |
| Q8TEW0 | Partitioning defective 3 homolog                                |
| P07900 | Heat shock protein HSP 90-alpha                                 |
| Q923E4 | NAD-dependent deacetylase sirtuin-1                             |
| P04637 | p53                                                             |
| Q9NRH2 | SNF-related serine/threonine-protein kinase                     |

## INTERACTOME FOR THIOREDOXIN

|        |                                                             |
|--------|-------------------------------------------------------------|
| P09429 | High mobility group protein B1                              |
| P27695 | DNA-(apurinic or apyrimidinic site) lyase                   |
| Q99683 | Mitogen-activated protein kinase kinase kinase 5            |
| O60739 | Eukaryotic translation initiation factor 1b                 |
| Q9HC24 | Protein lifeguard 4                                         |
| Q6FG91 | GABA(A) receptor-associated protein-like 2, isoform CRA_b   |
| Q96D09 | G-protein coupled receptor-associated sorting protein 2     |
| P78330 | Phosphoserine phosphatase                                   |
| Q96BK5 | PIN2/TERF1-interacting telomerase inhibitor 1               |
| Q86XK2 | F-box only protein 11                                       |
| Q53HC9 | Protein TSSC1                                               |
| O95990 | Protein FAM107A                                             |
| P40337 | Von Hippel-Lindau disease tumor suppressor                  |
| P11171 | Protein 4.1                                                 |
| P30480 | HLA class I histocompatibility antigen, B-42 alpha chain    |
| Q9H3M7 | Thioredoxin-interacting protein                             |
| P04406 | Glyceraldehyde-3-phosphate dehydrogenase                    |
| Q9H492 | Microtubule-associated proteins 1A/1B light chain 3A        |
| Q81NX1 | Conserved domain protein                                    |
| Q9H0R8 | Gamma-aminobutyric acid receptor-associated protein-like 1  |
| Q9GZQ8 | Microtubule-associated proteins 1A/1B light chain 3B        |
| O14879 | Interferon-induced protein with tetratricopeptide repeats 3 |
| O95166 | Gamma-aminobutyric acid receptor-associated protein         |
| Q99836 | Myeloid differentiation primary response protein MyD88      |
| P40692 | DNA mismatch repair protein Mlh1                            |
| Q8IUQ4 | E3 ubiquitin-protein ligase SIAH1                           |
| Q16621 | Transcription factor NF-E2 45 kDa subunit                   |
| O43707 | Alpha-actinin-4                                             |
| P63172 | Dynein light chain Tctex-type 1                             |
| Q9Y4K3 | TNF receptor-associated factor 6                            |
| P01106 | Myc proto-oncogene protein                                  |
| Q92905 | COP9 signalosome complex subunit 5                          |
| P25942 | Tumor necrosis factor receptor superfamily member 5         |
| P63104 | 14-3-3 protein zeta/delta                                   |
| P32119 | Peroxiredoxin-2                                             |
| P38936 | Cyclin-dependent kinase inhibitor 1                         |
| P00533 | Epidermal growth factor receptor                            |
| Q06830 | Peroxiredoxin-1                                             |

## INTERACTOME FOR WWP2

|        |                                                           |
|--------|-----------------------------------------------------------|
| P54259 | Atrophin-1                                                |
| Q93009 | Ubiquitin carboxyl-terminal hydrolase 7                   |
| O00308 | NEDD4-like E3 ubiquitin-protein ligase WWP2               |
| Q15796 | SMAD2                                                     |
| P84022 | SMAD3                                                     |
| O15105 | SMAD7                                                     |
| Q01844 | RNA-binding protein EWS                                   |
| P50552 | Vasodilator-stimulated phosphoprotein                     |
| Q9NR12 | PDZ and LIM domain protein 7                              |
| Q16630 | Cleavage and polyadenylation specificity factor subunit 6 |
| Q15637 | Splicing factor 1                                         |
| Q9BTC0 | Death-inducer obliterator 1                               |
| P0CG47 | Polyubiquitin-B                                           |
| Q14820 | Splicing factor 1, isoform CRA_b                          |
| Q9BWA2 | EWSR1 protein                                             |
| P0CG48 | Polyubiquitin-C                                           |
| Q9Y3C5 | RING finger protein 11                                    |

**SUPPLEMENTARY TABLE S6**  
**DISORDERED PROTEINS IN THE PTEN CANCER INTERACTOME**

| Entry  | Entry name  | Protein names                                                                                                                                                                                                                                                                                  | Gene names                                                          | Length |
|--------|-------------|------------------------------------------------------------------------------------------------------------------------------------------------------------------------------------------------------------------------------------------------------------------------------------------------|---------------------------------------------------------------------|--------|
| P31946 | 1433B_HUMAN | 14-3-3 protein beta/alpha (Protein 1054) (Protein kinase C inhibitor protein 1) (KCIP-1) [Cleaved into: 14-3-3 protein beta/alpha, N-terminally processed]                                                                                                                                     | YWHAB                                                               | 246    |
| P61981 | 1433G_HUMAN | 14-3-3 protein gamma (Protein kinase C inhibitor protein 1) (KCIP-1) [Cleaved into: 14-3-3 protein gamma, N-terminally processed]                                                                                                                                                              | YWHAG                                                               | 247    |
| P11171 | 41_HUMAN    | Protein 4.1 (P4.1) (4.1R) (Band 4.1) (EPB4.1)                                                                                                                                                                                                                                                  | EPB41 E41P                                                          | 864    |
| Q9NY61 | AATF_HUMAN  | Protein AATF (Apoptosis-antagonizing transcription factor) (Rb-binding protein Che-1)                                                                                                                                                                                                          | AATF CHE1 DED HSPC277                                               | 560    |
| P55196 | AFAD_HUMAN  | Afadin (ALL1-fused gene from chromosome 6 protein) (Protein AF-6)                                                                                                                                                                                                                              | MLLT4 AF6                                                           | 1824   |
| Q9ULX6 | AKP8L_HUMAN | A-kinase anchor protein 8-like (AKAP8-like protein) (Helicase A-binding protein 95) (HAP95) (Homologous to AKAP95 protein) (HA95) (Neighbor of A-kinase-anchoring protein 95) (Neighbor of AKAP95)                                                                                             | AKAP8L NAKAP NAKAP95 HRIHFB2018                                     | 646    |
| P84996 | ALEX_HUMAN  | Protein ALEX (Alternative gene product encoded by XL-exon)                                                                                                                                                                                                                                     | GNAS GNAS1                                                          | 626    |
| P55789 | ALR_HUMAN   | FAD-linked sulfhydryl oxidase ALR (EC 1.8.3.2) (Augmenter of liver regeneration) (HERV1) (Hepatopietin)                                                                                                                                                                                        | GFER ALR HERV1 HPO                                                  | 205    |
| P30533 | AMRP_HUMAN  | Alpha-2-macroglobulin receptor-associated protein (Alpha-2-MRAP) (Low density lipoprotein receptor-related protein-associated protein 1) (RAP)                                                                                                                                                 | LRPAP1 A2MRAP                                                       | 357    |
| Q92688 | AN32B_HUMAN | Acidic leucine-rich nuclear phosphoprotein 32 family member B (Acidic protein rich in leucines) (Putative HLA-DR-associated protein I-2) (PHAPI2) (Silver-stainable protein SSP29)                                                                                                             | ANP32B APRIL PHAPI2                                                 | 251    |
| Q9BTT0 | AN32E_HUMAN | Acidic leucine-rich nuclear phosphoprotein 32 family member E (LANP-like protein) (LANP-L)                                                                                                                                                                                                     | ANP32E                                                              | 268    |
| Q86WX3 | AROS_HUMAN  | Active regulator of SIRT1 (40S ribosomal protein S19-binding protein 1) (RPS19-binding protein 1) (S19BP)                                                                                                                                                                                      | RPS19BP1 AROS                                                       | 136    |
| Q99933 | BAG1_HUMAN  | BAG family molecular chaperone regulator 1 (BAG-1) (Bcl-2-associated athanogene 1)                                                                                                                                                                                                             | BAG1 HAP                                                            | 345    |
| Q9NRL2 | BAZ1A_HUMAN | Bromodomain adjacent to zinc finger domain protein 1A (ATP-dependent chromatin-remodeling protein) (ATP-utilizing chromatin assembly and remodeling factor 1) (hACF1) (CHRAC subunit ACF1) (Williams syndrome transcription factor-related chromatin-remodeling factor 180) (WCRF180) (hWALp1) | BAZ1A ACF1 WCRF180 HSPC317                                          | 1556   |
| Q9NWK9 | BCD1_HUMAN  | Box C/D snoRNA protein 1 (Serologically defined breast cancer antigen NY-BR-75) (Zinc finger HIT domain-containing protein 6)                                                                                                                                                                  | ZNHIT6 BCD1 C1orf181                                                | 470    |
| Q9NYF8 | BCLF1_HUMAN | Bcl-2-associated transcription factor 1 (Btf)                                                                                                                                                                                                                                                  | BCLAF1 BTF KIAA0164                                                 | 920    |
| Q00994 | BEX3_HUMAN  | Protein BEX3 (Brain-expressed X-linked protein 3) (Nerve growth factor receptor-associated protein 1) (Ovarian granulosa cell 13.0 kDa protein HGR74) (p75NTR-associated cell death executor)                                                                                                  | NGFRAP1 BEX3 DXS6984E NADE                                          | 111    |
| P38398 | BRCA1_HUMAN | Breast cancer type 1 susceptibility protein (EC 6.3.2.-) (RING finger protein 53)                                                                                                                                                                                                              | BRCA1 RNF53                                                         | 1863   |
| Q9NPI1 | BRD7_HUMAN  | Bromodomain-containing protein 7 (75 kDa bromodomain protein) (Protein CELTIX-1)                                                                                                                                                                                                               | BRD7 BP75 CELTIX1                                                   | 651    |
| Q5VTR2 | BRE1A_HUMAN | E3 ubiquitin-protein ligase BRE1A (BRE1-A) (hBRE1) (EC 6.3.2.-) (RING finger protein 20)                                                                                                                                                                                                       | RNF20 BRE1A                                                         | 975    |
| O75150 | BRE1B_HUMAN | E3 ubiquitin-protein ligase BRE1B (BRE1-B) (EC 6.3.2.-) (95 kDa retinoblastoma-associated protein) (RBP95) (RING finger protein 40)                                                                                                                                                            | RNF40 BRE1B KIAA0661                                                | 1001   |
| Q05682 | CALD1_HUMAN | Caldesmon (CDM)                                                                                                                                                                                                                                                                                | CALD1 CAD CDM                                                       | 793    |
| P62158 | CALM_HUMAN  | Calmodulin (CaM)                                                                                                                                                                                                                                                                               | CALM1 CALM CAM CAM1; CALM2 CAM2 CAMB; CALM3 CALML2 CAM3 CAMC CAMIII | 149    |
| P30658 | CBX2_MOUSE  | Chromobox protein homolog 2 (M33) (Modifier 3 protein)                                                                                                                                                                                                                                         | Cbx2 M33                                                            | 519    |
| O00257 | CBX4_HUMAN  | E3 SUMO-protein ligase CBX4 (EC 6.3.2.-) (Chromobox protein homolog 4) (Polycomb 2 homolog) (Pc2) (hPc2)                                                                                                                                                                                       | CBX4                                                                | 560    |
| Q8VDS3 | CBX7_MOUSE  | Chromobox protein homolog 7                                                                                                                                                                                                                                                                    | Cbx7 D15Ert417e                                                     | 158    |
| Q9HC52 | CBX8_HUMAN  | Chromobox protein homolog 8 (Polycomb 3 homolog) (Pc3) (hPc3) (Rectachrome 1)                                                                                                                                                                                                                  | CBX8 PC3 RC1                                                        | 389    |
| Q9BWC9 | CC106_HUMAN | Coiled-coil domain-containing protein 106                                                                                                                                                                                                                                                      | CCDC106                                                             | 280    |
| Q86WR0 | CCD25_HUMAN | Coiled-coil domain-containing protein 25                                                                                                                                                                                                                                                       | CCDC25                                                              | 208    |
| Q8N726 | CD2A2_HUMAN | Cyclin-dependent kinase inhibitor 2A, isoform 4 (p14ARF) (p19ARF)                                                                                                                                                                                                                              | CDKN2A CDKN2 MLM                                                    | 132    |



|        |             |                                                                                                                                                                                                                  |                                                                                                                                                                                                                                                                                                               |      |
|--------|-------------|------------------------------------------------------------------------------------------------------------------------------------------------------------------------------------------------------------------|---------------------------------------------------------------------------------------------------------------------------------------------------------------------------------------------------------------------------------------------------------------------------------------------------------------|------|
| Q64364 | CD2A2_MOUSE | Cyclin-dependent kinase inhibitor 2A, isoform 3 (p19ARF)                                                                                                                                                         | Cdkn2a                                                                                                                                                                                                                                                                                                        | 169  |
| Q16543 | CDC37_HUMAN | Hsp90 co-chaperone Cdc37 (Hsp90 chaperone protein kinase-targeting subunit) (p50Cdc37)                                                                                                                           | CDC37 CDC37A                                                                                                                                                                                                                                                                                                  | 378  |
| P38936 | CDN1A_HUMAN | Cyclin-dependent kinase inhibitor 1 (CDK-interacting protein 1) (Melanoma differentiation-associated protein 6) (MDA-6) (p21)                                                                                    | CDKN1A CAP20 CDKN1 CIP1 MDA6<br>PIC1 SDI1 WAF1                                                                                                                                                                                                                                                                | 164  |
| Q9UEE9 | CFDP1_HUMAN | Craniofacial development protein 1 (Bucentaur)                                                                                                                                                                   | CFDP1 BCNT                                                                                                                                                                                                                                                                                                    | 299  |
| Q7Z3E2 | CJ118_HUMAN | Uncharacterized protein C10orf118 (CTCL tumor antigen HD-CL-01/L14-2)                                                                                                                                            | C10orf118                                                                                                                                                                                                                                                                                                     | 898  |
| P09496 | CLCA_HUMAN  | Clathrin light chain A (Lca)                                                                                                                                                                                     | CLTA                                                                                                                                                                                                                                                                                                          | 248  |
| Q9BVG4 | CX026_HUMAN | UPF0368 protein Cxorf26                                                                                                                                                                                          | CXorf26                                                                                                                                                                                                                                                                                                       | 233  |
| Q9UER7 | DAXX_HUMAN  | Death domain-associated protein 6 (Daxx) (hDaxx) (ETS1-associated protein 1) (EAP1) (Fas death domain-associated protein)                                                                                        | DAXX BING2 DAP6                                                                                                                                                                                                                                                                                               | 740  |
| O54946 | DNJB6_MOUSE | DnaJ homolog subfamily B member 6 (Heat shock protein J2) (HSJ-2) (MRJ) (mDj4)                                                                                                                                   | Dnajb6 Hsj2 Mrj                                                                                                                                                                                                                                                                                               | 365  |
| Q9H501 | ESF1_HUMAN  | ESF1 homolog (ABT1-associated protein)                                                                                                                                                                           | ESF1 ABTAP C20orf6 HDCMC28P                                                                                                                                                                                                                                                                                   | 851  |
| P15311 | EZRI_HUMAN  | Ezrin (Cytovillin) (Villin-2) (p81)                                                                                                                                                                              | EZR VIL2                                                                                                                                                                                                                                                                                                      | 586  |
| P50502 | F10A1_HUMAN | Hsc70-interacting protein (Hip) (Progesterone receptor-associated p48 protein) (Protein FAM10A1) (Putative tumor suppressor ST13) (Renal carcinoma antigen NY-REN-33) (Suppression of tumorigenicity 13 protein) | ST13 FAM10A1 HIP SNC6                                                                                                                                                                                                                                                                                         | 369  |
| Q96MY7 | F161B_HUMAN | Protein FAM161B                                                                                                                                                                                                  | FAM161B C14orf44                                                                                                                                                                                                                                                                                              | 647  |
| P51116 | FXR2_HUMAN  | Fragile X mental retardation syndrome-related protein 2                                                                                                                                                          | FXR2 FMR1L2                                                                                                                                                                                                                                                                                                   | 673  |
| Q13283 | G3BP1_HUMAN | Ras GTPase-activating protein-binding protein 1 (G3BP-1) (EC 3.6.4.12) (EC 3.6.4.13) (ATP-dependent DNA helicase VIII) (hDH VIII) (GAP SH3 domain-binding protein 1)                                             | G3BP1 G3BP                                                                                                                                                                                                                                                                                                    | 466  |
| Q96CN9 | GCC1_HUMAN  | GRIP and coiled-coil domain-containing protein 1 (Golgi coiled-coil protein 1)                                                                                                                                   | GCC1                                                                                                                                                                                                                                                                                                          | 775  |
| P14136 | GFAP_HUMAN  | Glial fibrillary acidic protein (GFAP)                                                                                                                                                                           | GFAP                                                                                                                                                                                                                                                                                                          | 432  |
| Q86WP2 | GPBP1_HUMAN | Vasculin (GC-rich promoter-binding protein 1) (Vascular wall-linked protein)                                                                                                                                     | GPBP1 GPBP SSH6                                                                                                                                                                                                                                                                                               | 473  |
| P16403 | H12_HUMAN   | Histone H1.2 (Histone H1d)                                                                                                                                                                                       | HIST1H1C H1F2                                                                                                                                                                                                                                                                                                 | 213  |
| Q92522 | H1X_HUMAN   | Histone H1x                                                                                                                                                                                                      | H1FX                                                                                                                                                                                                                                                                                                          | 213  |
| P23527 | H2B1O_HUMAN | Histone H2B type 1-O (Histone H2B.2) (Histone H2B.n) (H2B/n)                                                                                                                                                     | HIST1H2BO H2BFH H2BFN                                                                                                                                                                                                                                                                                         | 126  |
| P84243 | H33_HUMAN   | Histone H3.3                                                                                                                                                                                                     | H3F3A H3.3A H3F3 PP781; H3F3B H3.3B                                                                                                                                                                                                                                                                           | 136  |
| P62805 | H4_HUMAN    | Histone H4                                                                                                                                                                                                       | HIST1H4A H4/A H4FA; HIST1H4B H4/I H4FI;<br>HIST1H4C H4/G H4FG; HIST1H4D H4/B<br>H4FB; HIST1H4E H4/J H4FJ; HIST1H4F H4/C<br>H4FC; HIST1H4H H4/H H4FH; HIST1H4I<br>H4/M H4FM; HIST1H4J H4/E H4FE;<br>HIST1H4K H4/D H4FD; HIST1H4L H4/K<br>H4FK; HIST2H4A H4/N H4F2 H4FN<br>HIST2H4; HIST2H4B H4/O H4FO; HIST4H4 | 103  |
| P54257 | HAP1_HUMAN  | Huntingtin-associated protein 1 (HAP-1) (Neuroan 1)                                                                                                                                                              | HAP1 HAP2 HLP1                                                                                                                                                                                                                                                                                                | 671  |
| O35387 | HAX1_MOUSE  | HCLS1-associated protein X-1 (HS1-associating protein X-1) (HAX-1) (HS1-binding protein 1) (HSP1BP-1)                                                                                                            | Hax1 Hs1bp1                                                                                                                                                                                                                                                                                                   | 280  |
| Q7Z4V5 | HDGR2_HUMAN | Hepatoma-derived growth factor-related protein 2 (HRP-2) (Hepatoma-derived growth factor 2) (HDGF-2)                                                                                                             | HDGFRP2 HDGF2 UNQ785/PRO1604                                                                                                                                                                                                                                                                                  | 671  |
| P09429 | HMGB1_HUMAN | High mobility group protein B1 (High mobility group protein 1) (HMG-1)                                                                                                                                           | HMGB1 HMG1                                                                                                                                                                                                                                                                                                    | 215  |
| Q15651 | HMGN3_HUMAN | High mobility group nucleosome-binding domain-containing protein 3 (Thyroid receptor-interacting protein 7) (TR-interacting protein 7) (TRIP-7)                                                                  | HMGN3 TRIP7 PNAS-24                                                                                                                                                                                                                                                                                           | 99   |
| Q00839 | HNRPU_HUMAN | Heterogeneous nuclear ribonucleoprotein U (hnRNP U) (Scaffold attachment factor A) (SAF-A) (p120) (pp120)                                                                                                        | HNRNPU HNRPU SAFA U21.1                                                                                                                                                                                                                                                                                       | 825  |
| P20042 | IF2B_HUMAN  | Eukaryotic translation initiation factor 2 subunit 2 (Eukaryotic translation initiation factor 2 subunit beta) (eIF-2-beta)                                                                                      | EIF2S2 EIF2B                                                                                                                                                                                                                                                                                                  | 333  |
| O60841 | IF2P_HUMAN  | Eukaryotic translation initiation factor 5B (eIF-5B) (Translation initiation factor IF-2)                                                                                                                        | EIF5B IF2 KIAA0741                                                                                                                                                                                                                                                                                            | 1220 |

|        |              |                                                                                                                                                                                                                                                                                                |                             |      |
|--------|--------------|------------------------------------------------------------------------------------------------------------------------------------------------------------------------------------------------------------------------------------------------------------------------------------------------|-----------------------------|------|
| P23588 | IF4B_HUMAN   | Eukaryotic translation initiation factor 4B (eIF-4B)                                                                                                                                                                                                                                           | EIF4B                       | 611  |
| Q9C086 | INO80B_HUMAN | INO80 complex subunit B (High mobility group AT-hook 1-like 4) (IES2 homolog) (hIes2) (PAP-1-associated protein 1) (PAPA-1) (Zinc finger HIT domain-containing protein 4)                                                                                                                      | INO80B HMGA1L4 PAPA1 ZNHIT4 | 356  |
| Q9UNL4 | ING4_HUMAN   | Inhibitor of growth protein 4 (p29ING4)                                                                                                                                                                                                                                                        | ING4 My036                  | 249  |
| Q9HDC5 | JPH1_HUMAN   | Junctophilin-1 (JP-1) (Junctophilin type 1)                                                                                                                                                                                                                                                    | JPH1 JP1                    | 661  |
| O95251 | KAT7_HUMAN   | Histone acetyltransferase KAT7 (EC 2.3.1.48) (Histone acetyltransferase binding to ORC1) (Lysine acetyltransferase 7) (MOZ, YBF2/SAS3, SAS2 and TIP60 protein 2) (MYST-2)                                                                                                                      | KAT7 HBO1 HBOa MYST2        | 611  |
| Q02241 | KIF23_HUMAN  | Kinesin-like protein KIF23 (Kinesin-like protein 5) (Mitotic kinesin-like protein 1)                                                                                                                                                                                                           | KIF23 KNSL5 MKLP1           | 960  |
| Q9Y496 | KIF3A_HUMAN  | Kinesin-like protein KIF3A (Microtubule plus end-directed kinesin motor 3A)                                                                                                                                                                                                                    | KIF3A KIF3                  | 699  |
| Q86UP2 | KTN1_HUMAN   | Kinectin (CG-1 antigen) (Kinesin receptor)                                                                                                                                                                                                                                                     | KTN1 CG1 KIAA0004           | 1357 |
| Q9UHB6 | LIMA1_HUMAN  | LIM domain and actin-binding protein 1 (Epithelial protein lost in neoplasm)                                                                                                                                                                                                                   | LIMA1 EPLIN SREBP3 PP624    | 759  |
| P02545 | LMNA_HUMAN   | Prelamin-A/C [Cleaved into: Lamin-A/C (70 kDa lamin) (Renal carcinoma antigen NY-REN-32)]                                                                                                                                                                                                      | LMNA LMN1                   | 664  |
| P46821 | MAP1B_HUMAN  | Microtubule-associated protein 1B (MAP-1B) [Cleaved into: MAP1B heavy chain; MAP1 light chain LC1]                                                                                                                                                                                             | MAP1B                       | 2468 |
| Q9UIS9 | MBD1_HUMAN   | Methyl-CpG-binding domain protein 1 (CXXC-type zinc finger protein 3) (Methyl-CpG-binding protein MBD1) (Protein containing methyl-CpG-binding domain 1)                                                                                                                                       | MBD1 CXXC3 PCM1             | 605  |
| Q00987 | MDM2_HUMAN   | E3 ubiquitin-protein ligase Mdm2 (EC 6.3.2.-) (Double minute 2 protein) (Hdm2) (Oncoprotein Mdm2) (p53-binding protein Mdm2)                                                                                                                                                                   | MDM2                        | 491  |
| P56273 | MDM2_XENLA   | E3 ubiquitin-protein ligase Mdm2 (EC 6.3.2.-) (Double minute 2 protein) (Xdm2) (p53-binding protein Mdm2)                                                                                                                                                                                      | mdm2                        | 473  |
| Q8IZD2 | MLL5_HUMAN   | Histone-lysine N-methyltransferase MLL5 (EC 2.1.1.43) (Lysine N-methyltransferase 2E) (KMT2E) (Myeloid/lymphoid or mixed-lineage leukemia protein 5)                                                                                                                                           | MLL5 KMT2E                  | 1858 |
| P26038 | MOES_HUMAN   | Moesin (Membrane-organizing extension spike protein)                                                                                                                                                                                                                                           | MSN                         | 577  |
| Q99547 | MPH6_HUMAN   | M-phase phosphoprotein 6                                                                                                                                                                                                                                                                       | MPHOSPH6 MPP6               | 160  |
| Q6WCQ1 | MPRIP_HUMAN  | Myosin phosphatase Rho-interacting protein (M-RIP) (Rho-interacting protein 3) (RIP3) (p116Rip)                                                                                                                                                                                                | MPRIP KIAA0864 MRIP RHOIP3  | 1025 |
| P01106 | MYC_HUMAN    | Myc proto-oncogene protein (Class E basic helix-loop-helix protein 39) (bHLHe39) (Proto-oncogene c-Myc) (Transcription factor p64)                                                                                                                                                             | MYC BHLHE39                 | 439  |
| P35579 | MYH9_HUMAN   | Myosin-9 (Cellular myosin heavy chain, type A) (Myosin heavy chain 9) (Myosin heavy chain, non-muscle IIa) (Non-muscle myosin heavy chain A) (NMMHC-A) (Non-muscle myosin heavy chain IIa) (NMMHC II-a) (NMMHC-IIA)                                                                            | MYH9                        | 1960 |
| Q14919 | NC2A_HUMAN   | Dr1-associated corepressor (Dr1-associated protein 1) (Negative co-factor 2-alpha) (NC2-alpha)                                                                                                                                                                                                 | DRAP1                       | 205  |
| Q96SB3 | NEB2_HUMAN   | Neurabin-2 (Neurabin-II) (Protein phosphatase 1 regulatory subunit 9B) (Spinophilin)                                                                                                                                                                                                           | PPP1R9B PPP1R6              | 815  |
| Q60795 | NF2L2_MOUSE  | Nuclear factor erythroid 2-related factor 2 (NF-E2-related factor 2) (NFE2-related factor 2) (Nuclear factor, erythroid derived 2, like 2)                                                                                                                                                     | Nfe2l2 Nrf-2 Nrf2           | 597  |
| P07197 | NFM_HUMAN    | Neurofilament medium polypeptide (NF-M) (160 kDa neurofilament protein) (Neurofilament 3) (Neurofilament triplet M protein)                                                                                                                                                                    | NEFM NEF3 NFM               | 916  |
| Q15599 | NHRF2_HUMAN  | Na(+)/H(+) exchange regulatory cofactor NHE-RF2 (NHERF-2) (NHE3 kinase A regulatory protein E3KARP) (SRY-interacting protein 1) (SIP-1) (Sodium-hydrogen exchanger regulatory factor 2) (Solute carrier family 9 isoform A3 regulatory factor 2) (Tyrosine kinase activator protein 1) (TKA-1) | SLC9A3R2 NHERF2             | 337  |
| O60936 | NOL3_HUMAN   | Nucleolar protein 3 (Apoptosis repressor with CARD) (Muscle-enriched cytoplasmic protein) (Myp) (Nucleolar protein of 30 kDa) (Nop30)                                                                                                                                                          | NOL3 ARC NOP                | 219  |
| Q14978 | NOLC1_HUMAN  | Nucleolar and coiled-body phosphoprotein 1 (140 kDa nucleolar phosphoprotein) (Nopp140) (Hepatitis C virus NS5A-transactivated protein 13) (HCV NS5A-transactivated protein 13) (Nucleolar 130 kDa protein) (Nucleolar phosphoprotein p130)                                                    | NOLC1 KIAA0035 NS5ATP13     | 699  |
| Q9NPE3 | NOP10_HUMAN  | H/ACA ribonucleoprotein complex subunit 3 (Nucleolar protein 10) (Nucleolar protein family A member 3) (snoRNP protein NOP10)                                                                                                                                                                  | NOP10 NOLA3                 | 64   |
| P55209 | NP1L1_HUMAN  | Nucleosome assembly protein 1-like 1 (NAP-1-related protein) (hNRP)                                                                                                                                                                                                                            | NAP1L1 NRP                  | 391  |
| P06748 | NPM_HUMAN    | Nucleophosmin (NPM) (Nucleolar phosphoprotein B23) (Nucleolar protein NO38) (Numatrin)                                                                                                                                                                                                         | NPM1 NPM                    | 294  |
| P19338 | NUCL_HUMAN   | Nucleolin (Protein C23)                                                                                                                                                                                                                                                                        | NCL                         | 710  |
| Q13438 | OS9_HUMAN    | Protein OS-9 (Amplified in osteosarcoma 9)                                                                                                                                                                                                                                                     | OS9                         | 667  |
| Q9BTK6 | PA1_HUMAN    | PAXIP1-associated protein 1 (PTIP-associated protein 1)                                                                                                                                                                                                                                        | PA1 C16orf53                | 254  |
| Q8TEW0 | PARD3_HUMAN  | Partitioning defective 3 homolog (PAR-3) (PARD-3) (Atypical PKC isotype-specific-interacting protein) (ASIP) (CTCL tumor antigen se2-5) (PAR3-alpha)                                                                                                                                           | PARD3 PAR3 PAR3A            | 1356 |

|        |             |                                                                                                                                                                                                                                         |                                        |      |
|--------|-------------|-----------------------------------------------------------------------------------------------------------------------------------------------------------------------------------------------------------------------------------------|----------------------------------------|------|
| P40855 | PEX19_HUMAN | Peroxisomal biogenesis factor 19 (33 kDa housekeeping protein) (Peroxin-19) (Peroxisomal farnesylated protein)                                                                                                                          | PEX19 HK33 PXF OK/SW-cl.22             | 299  |
| Q9NWQ8 | PHAG1_HUMAN | Phosphoprotein associated with glycosphingolipid-enriched microdomains 1 (Csk-binding protein) (Transmembrane adapter protein PAG) (Transmembrane phosphoprotein Cbp)                                                                   | PAG1 CBP PAG                           | 432  |
| Q13526 | PIN1_HUMAN  | Peptidyl-prolyl cis-trans isomerase NIMA-interacting 1 (EC 5.2.1.8) (Peptidyl-prolyl cis-trans isomerase Pin1) (PPIase Pin1) (Rotamase Pin1)                                                                                            | PIN1                                   | 163  |
| Q8NG27 | PJA1_HUMAN  | E3 ubiquitin-protein ligase Praja-1 (Praja1) (EC 6.3.2.-) (RING finger protein 70)                                                                                                                                                      | PJA1 RNF70                             | 643  |
| Q9BZL4 | PP12C_HUMAN | Protein phosphatase 1 regulatory subunit 12C (Protein phosphatase 1 myosin-binding subunit of 85 kDa) (Protein phosphatase 1 myosin-binding subunit p85)                                                                                | PPP1R12C LENG3 MBS85                   | 782  |
| Q13523 | PRP4B_HUMAN | Serine/threonine-protein kinase PRP4 homolog (EC 2.7.11.1) (PRP4 kinase) (PRP4 pre-mRNA-processing factor 4 homolog)                                                                                                                    | PRPF4B KIAA0536 PRP4 PRP4H PRP4K       | 1007 |
| Q8WXF1 | PSPC1_HUMAN | Paraspeckle component 1 (Paraspeckle protein 1)                                                                                                                                                                                         | PSPC1 PSP1                             | 523  |
| P20962 | PTMS_HUMAN  | Parathyrosin                                                                                                                                                                                                                            | PTMS                                   | 102  |
| Q05209 | PTN12_HUMAN | Tyrosine-protein phosphatase non-receptor type 12 (EC 3.1.3.48) (PTP-PEST) (Protein-tyrosine phosphatase G1) (PTPG1)                                                                                                                    | PTPN12                                 | 780  |
| P26043 | RADI_MOUSE  | Radixin (ESP10)                                                                                                                                                                                                                         | Rdx                                    | 583  |
| Q9H6Z4 | RANB3_HUMAN | Ran-binding protein 3 (RanBP3)                                                                                                                                                                                                          | RANBP3                                 | 567  |
| Q8IUD2 | RB6I2_HUMAN | ELKS/Rab6-interacting/CAST family member 1 (ERC-1) (Rab6-interacting protein 2)                                                                                                                                                         | ERC1 ELKS KIAA1081 RAB6IP2             | 1116 |
| P98175 | RBM10_HUMAN | RNA-binding protein 10 (G patch domain-containing protein 9) (RNA-binding motif protein 10) (RNA-binding protein S1-1) (S1-1)                                                                                                           | RBM10 DXS8237E GPATC9 GPATCH9 KIAA0122 | 930  |
| Q9BZI7 | REN3B_HUMAN | Regulator of nonsense transcripts 3B (Nonsense mRNA reducing factor 3B) (Up-frameshift suppressor 3 homolog B) (hUpf3B) (Up-frameshift suppressor 3 homolog on chromosome X) (hUpf3p-X)                                                 | UPF3B RENT3B UPF3X                     | 483  |
| Q86UR5 | RIMS1_HUMAN | Regulating synaptic membrane exocytosis protein 1 (Rab-3-interacting molecule 1) (RIM 1) (Rab-3-interacting protein 2)                                                                                                                  | RIMS1 KIAA0340 RAB3IP2 RIM1 Nbla00761  | 1692 |
| P61313 | RL15_HUMAN  | 60S ribosomal protein L15                                                                                                                                                                                                               | RPL15 EC45 TCBAP0781                   | 204  |
| P62987 | RL40_HUMAN  | Ubiquitin-60S ribosomal protein L40 (CEP52) (Ubiquitin A-52 residue ribosomal protein fusion product 1) [Cleaved into: Ubiquitin; 60S ribosomal protein L40]                                                                            | UBA52 UBCEP2                           | 128  |
| P36578 | RL4_HUMAN   | 60S ribosomal protein L4 (60S ribosomal protein L1)                                                                                                                                                                                     | RPL4 RPL1                              | 427  |
| Q9Y252 | RNF6_HUMAN  | E3 ubiquitin-protein ligase RNF6 (EC 6.3.2.-)                                                                                                                                                                                           | RNF6 SPG2                              | 685  |
| P09651 | ROA1_HUMAN  | Heterogeneous nuclear ribonucleoprotein A1 (hnRNP A1) (Helix-destabilizing protein) (Single-strand RNA-binding protein) (hnRNP core protein A1)                                                                                         | HNRNPA1 HNRPA1                         | 372  |
| P51991 | ROA3_HUMAN  | Heterogeneous nuclear ribonucleoprotein A3 (hnRNP A3)                                                                                                                                                                                   | HNRNPA3 HNRPA3                         | 378  |
| Q13464 | ROCK1_HUMAN | Rho-associated protein kinase 1 (EC 2.7.11.1) (Renal carcinoma antigen NY-REN-35) (Rho-associated, coiled-coil-containing protein kinase 1) (Rho-associated, coiled-coil-containing protein kinase I) (ROCK-I) (p160 ROCK-1) (p160ROCK) | ROCK1                                  | 1354 |
| O15446 | RPA34_HUMAN | DNA-directed RNA polymerase I subunit RPA34 (A34.5) (Antisense to ERCC-1 protein) (ASE-1) (CD3-epsilon-associated protein) (CAST) (CD3E-associated protein) (RNA polymerase I-associated factor PAF49)                                  | CD3EAP ASE1 CAST PAF49                 | 510  |
| P62979 | RS27A_HUMAN | Ubiquitin-40S ribosomal protein S27a (Ubiquitin carboxyl extension protein 80) [Cleaved into: Ubiquitin; 40S ribosomal protein S27a]                                                                                                    | RPS27A UBA80 UBCEP1                    | 156  |
| P62241 | RS8_HUMAN   | 40S ribosomal protein S8                                                                                                                                                                                                                | RPS8 OK/SW-cl.83                       | 208  |
| Q96T23 | RSF1_HUMAN  | Remodeling and spacing factor 1 (Rsf-1) (HBV pX-associated protein 8) (Hepatitis B virus X-associated protein) (p325 subunit of RSF chromatin-remodeling complex)                                                                       | RSF1 HBXAP XAP8                        | 1441 |
| Q86UC2 | RSPH3_HUMAN | Radial spoke head protein 3 homolog (Radial spoke head-like protein 2)                                                                                                                                                                  | RSPH3 RSHL2 RSP3                       | 560  |
| Q92541 | RTF1_HUMAN  | RNA polymerase-associated protein RTF1 homolog                                                                                                                                                                                          | RTF1 KIAA0252                          | 710  |
| P08621 | RU17_HUMAN  | U1 small nuclear ribonucleoprotein 70 kDa (U1 snRNP 70 kDa) (U1-70K) (snRNP70)                                                                                                                                                          | SNRNP70 RNPU1Z RPU1 SNRP70 U1AP1       | 437  |
| Q8N488 | RYBP_HUMAN  | RING1 and YY1-binding protein (Apoptin-associating protein 1) (APAP-1) (Death effector domain-associated factor) (DED-associated factor) (YY1 and E4TF1-associated factor 1)                                                            | RYBP DEDAF YEAF1                       | 228  |
| P04271 | S100B_HUMAN | Protein S100-B (S-100 protein beta chain) (S-100 protein subunit beta) (S100 calcium-binding protein B)                                                                                                                                 | S100B                                  | 92   |
| Q15424 | SAFB1_HUMAN | Scaffold attachment factor B1 (SAF-B) (SAF-B1) (HSP27 estrogen response element-TATA box-binding protein) (HSP27 ERE-TATA-binding protein)                                                                                              | SAFB HAP HET SAFB1                     | 915  |
| Q14151 | SAFB2_HUMAN | Scaffold attachment factor B2 (SAF-B2)                                                                                                                                                                                                  | SAFB2 KIAA0138                         | 953  |

|        |             |                                                                                                                                                                                                                                                                                                                                                                          |                                             |      |
|--------|-------------|--------------------------------------------------------------------------------------------------------------------------------------------------------------------------------------------------------------------------------------------------------------------------------------------------------------------------------------------------------------------------|---------------------------------------------|------|
| P05060 | SCG1_HUMAN  | Secretogranin-1 (Chromogranin-B) (CgB) (Secretogranin I) (SgI) [Cleaved into: GAWK peptide; CCB peptide]                                                                                                                                                                                                                                                                 | CHGB SCG1                                   | 677  |
| Q9HC62 | SENP2_HUMAN | Sentrin-specific protease 2 (EC 3.4.22.68) (Axam2) (SMT3-specific isopeptidase 2) (Smt3ip2) (Sentrin/SUMO-specific protease SENP2)                                                                                                                                                                                                                                       | SENP2 KIAA1331                              | 589  |
| Q9BYW2 | SETD2_HUMAN | Histone-lysine N-methyltransferase SETD2 (EC 2.1.1.43) (HIF-1) (Huntingtin yeast partner B) (Huntingtin-interacting protein 1) (HIP-1) (Huntingtin-interacting protein B) (Lysine N-methyltransferase 3A) (SET domain-containing protein 2) (hSET2) (p231HBP)                                                                                                            | SETD2 HIF1 HYPB KIAA1732 KMT3A SET2 HSPC069 | 2564 |
| Q13435 | SF3B2_HUMAN | Splicing factor 3B subunit 2 (Pre-mRNA-splicing factor SF3b 145 kDa subunit) (SF3b145) (SF3b150) (Spliceosome-associated protein 145) (SAP 145)                                                                                                                                                                                                                          | SF3B2 SAP145                                | 895  |
| P62314 | SMD1_HUMAN  | Small nuclear ribonucleoprotein Sm D1 (Sm-D1) (Sm-D autoantigen) (snRNP core protein D1)                                                                                                                                                                                                                                                                                 | SNRPD1                                      | 119  |
| Q92922 | SMRC1_HUMAN | SWI/SNF complex subunit SMARCC1 (BRG1-associated factor 155) (BAF155) (SWI/SNF complex 155 kDa subunit) (SWI/SNF-related matrix-associated actin-dependent regulator of chromatin subfamily C member 1)                                                                                                                                                                  | SMARCC1 BAF155                              | 1105 |
| Q9Y675 | SNURF_HUMAN | SNRPN upstream reading frame protein                                                                                                                                                                                                                                                                                                                                     | SNURF                                       | 71   |
| Q13573 | SNW1_HUMAN  | SNW domain-containing protein 1 (Nuclear protein SkiP) (Nuclear receptor coactivator NCoA-62) (Ski-interacting protein)                                                                                                                                                                                                                                                  | SNW1 SKIIP SKIP                             | 536  |
| Q7KZ85 | SPT6H_HUMAN | Transcription elongation factor SPT6 (hSPT6) (Tat-cotransactivator 2 protein) (Tat-CT2 protein)                                                                                                                                                                                                                                                                          | SUPT6H KIAA0162 SPT6H                       | 1726 |
| Q13813 | SPTN1_HUMAN | Spectrin alpha chain, non-erythrocytic 1 (Alpha-II spectrin) (Fodrin alpha chain) (Spectrin, non-erythroid alpha subunit)                                                                                                                                                                                                                                                | SPTAN1 NEAS SPTA2                           | 2472 |
| Q14247 | SRC8_HUMAN  | Src substrate cortactin (Amplaxin) (Oncogene EMS1)                                                                                                                                                                                                                                                                                                                       | CTTN EMS1                                   | 550  |
| Q9UQ35 | SRRM2_HUMAN | Serine/arginine repetitive matrix protein 2 (300 kDa nuclear matrix antigen) (Serine/arginine-rich splicing factor-related nuclear matrix protein of 300 kDa) (SR-related nuclear matrix protein of 300 kDa) (Ser/Arg-related nuclear matrix protein of 300 kDa) (Splicing coactivator subunit SRm300) (Tax-responsive enhancer element-binding protein 803) (TaxREB803) | SRRM2 KIAA0324 SRL300 SRM300 HSPC075        | 2752 |
| Q05519 | SRS11_HUMAN | Serine/arginine-rich splicing factor 11 (Arginine-rich 54 kDa nuclear protein) (p54) (Splicing factor, arginine/serine-rich 11)                                                                                                                                                                                                                                          | SRSF11 SFRS11                               | 484  |
| Q13243 | SRSF5_HUMAN | Serine/arginine-rich splicing factor 5 (Delayed-early protein HRS) (Pre-mRNA-splicing factor SRP40) (Splicing factor, arginine/serine-rich 5)                                                                                                                                                                                                                            | SRSF5 HRS SFRS5 SRP40                       | 272  |
| Q05066 | SRY_HUMAN   | Sex-determining region Y protein (Testis-determining factor)                                                                                                                                                                                                                                                                                                             | SRY TDF                                     | 204  |
| Q9NQ55 | SSF1_HUMAN  | Suppressor of SWI4 1 homolog (Ssf-1) (Brix domain-containing protein 3) (Peter Pan homolog)                                                                                                                                                                                                                                                                              | PPAN BXDC3 SSF1                             | 473  |
| P63165 | SUMO1_HUMAN | Small ubiquitin-related modifier 1 (SUMO-1) (GAP-modifying protein 1) (GMP1) (SMT3 homolog 3) (Sentrin) (Ubiquitin-homology domain protein PIC1) (Ubiquitin-like protein SMT3C) (Smt3C) (Ubiquitin-like protein UBL1)                                                                                                                                                    | SUMO1 SMT3C SMT3H3 UBL1 OK/SW-cl.43         | 101  |
| O75683 | SURF6_HUMAN | Surfeit locus protein 6                                                                                                                                                                                                                                                                                                                                                  | SURF6 SURF-6                                | 361  |
| P35269 | T2FA_HUMAN  | General transcription factor IIF subunit 1 (General transcription factor IIF 74 kDa subunit) (Transcription initiation factor IIF subunit alpha) (TFIIF-alpha) (Transcription initiation factor RAP74)                                                                                                                                                                   | GTF2F1 RAP74                                | 517  |
| Q5VWG9 | TAF3_HUMAN  | Transcription initiation factor TFIID subunit 3 (140 kDa TATA box-binding protein-associated factor) (TBP-associated factor 3) (Transcription initiation factor TFIID 140 kDa subunit) (TAF3)                                                                                                                                                                            |                                             | 929  |
| Q6IPX3 | TCAL6_HUMAN | Transcription elongation factor A protein-like 6 (TCEA-like protein 6) (Transcription elongation factor S-II protein-like 6)                                                                                                                                                                                                                                             | TCEAL6                                      | 200  |
| Q13428 | TCOF_HUMAN  | Treacle protein (Treacher Collins syndrome protein)                                                                                                                                                                                                                                                                                                                      | TCOF1                                       | 1488 |
| P0C1Z6 | TFPT_HUMAN  | TCF3 fusion partner (INO80 complex subunit F) (Protein FB1)                                                                                                                                                                                                                                                                                                              | TFPT INO80F                                 | 253  |
| Q86V81 | THOC4_HUMAN | THO complex subunit 4 (Tho4) (Ally of AML-1 and LEF-1) (Aly/REF export factor) (Transcriptional coactivator Aly/REF) (bZIP-enhancing factor BEF)                                                                                                                                                                                                                         | ALYREF ALY BEF THOC4                        | 257  |
| P82094 | TMF1_HUMAN  | TATA element modulatory factor (TMF) (Androgen receptor coactivator 160 kDa protein) (Androgen receptor-associated protein of 160 kDa)                                                                                                                                                                                                                                   | TMF1 ARA160                                 | 1093 |
| Q8NFZ5 | TNIP2_HUMAN | TNFAIP3-interacting protein 2 (A20-binding inhibitor of NF-kappa-B activation 2) (ABIN-2) (Fetal liver LKB1-interacting protein)                                                                                                                                                                                                                                         | TNIP2 ABIN2 FLIP1                           | 429  |
| Q9UPQ9 | TNR6B_HUMAN | Trinucleotide repeat-containing gene 6B protein                                                                                                                                                                                                                                                                                                                          | TNRC6B KIAA1093                             | 1833 |
| P11387 | TOP1_HUMAN  | DNA topoisomerase 1 (EC 5.99.1.2) (DNA topoisomerase I)                                                                                                                                                                                                                                                                                                                  | TOP1                                        | 765  |
| Q9NS56 | TOPRS_HUMAN | E3 ubiquitin-protein ligase Topors (EC 6.3.2.-) (SUMO1-protein E3 ligase Topors) (Topoisomerase I-binding RING finger protein) (Topoisomerase I-binding arginine/serine-rich protein) (Tumor suppressor p53-binding protein 3) (p53-binding protein 3) (p53BP3)                                                                                                          | TOPORS LUN TP53BPL                          | 1045 |
| Q12888 | TP53B_HUMAN | Tumor suppressor p53-binding protein 1 (53BP1) (p53-binding protein 1) (p53BP1)                                                                                                                                                                                                                                                                                          | TP53BP1                                     | 1972 |
| P06753 | TPM3_HUMAN  | Tropomyosin alpha-3 chain (Gamma-tropomyosin) (Tropomyosin-3) (Tropomyosin-5) (hTM5)                                                                                                                                                                                                                                                                                     | TPM3                                        | 284  |
| P67936 | TPM4_HUMAN  | Tropomyosin alpha-4 chain (TM30p1) (Tropomyosin-4)                                                                                                                                                                                                                                                                                                                       | TPM4                                        | 248  |
| P12270 | TPR_HUMAN   | Nucleoprotein TPR                                                                                                                                                                                                                                                                                                                                                        | TPR                                         | 2363 |

|        |              |                                                                                                                                                                                                                                                                                      |                                            |      |
|--------|--------------|--------------------------------------------------------------------------------------------------------------------------------------------------------------------------------------------------------------------------------------------------------------------------------------|--------------------------------------------|------|
| Q9Y2W1 | TR150_HUMAN  | Thyroid hormone receptor-associated protein 3 (Thyroid hormone receptor-associated protein complex 150 kDa component) (Trap150)                                                                                                                                                      | THRAP3 TRAP150                             | 955  |
| Q9H2G4 | TSYL2_HUMAN  | Testis-specific Y-encoded-like protein 2 (TSPY-like protein 2) (Cell division autoantigen 1) (Cutaneous T-cell lymphoma-associated antigen se20-4) (CTCL-associated antigen se20-4) (Differentially-expressed nucleolar TGF-beta1 target protein) (Nuclear protein of 79 kDa) (NP79) | TSPYL2 CDA1 DENTT TSPX HRIHFB2216          | 693  |
| P62328 | TYB4_HUMAN   | Thymosin beta-4 (T beta-4) (Fx) [Cleaved into: Hematopoietic system regulatory peptide (Seraspenide)]                                                                                                                                                                                | TMSB4X TB4X THYB4 TMSB4                    | 44   |
| P25490 | TTY1_HUMAN   | Transcriptional repressor protein YY1 (Delta transcription factor) (INO80 complex subunit S) (NF-E1) (Yin and yang 1) (YY-1)                                                                                                                                                         | YY1 INO80S                                 | 414  |
| Q9H9J4 | UBP42_HUMAN  | Ubiquitin carboxyl-terminal hydrolase 42 (EC 3.4.19.12) (Deubiquitinating enzyme 42) (Ubiquitin thioesterase 42) (Ubiquitin-specific-processing protease 42)                                                                                                                         | USP42                                      | 1324 |
| Q96RL1 | UIMC1_HUMAN  | BRCA1-A complex subunit RAP80 (Receptor-associated protein 80) (Retinoid X receptor-interacting protein 110) (Ubiquitin interaction motif-containing protein 1)                                                                                                                      | UIMC1 RAP80 RXRIP110                       | 719  |
| P08670 | VIME_HUMAN   | Vimentin                                                                                                                                                                                                                                                                             | VIM                                        | 466  |
| P20152 | VIME_MOUSE   | Vimentin                                                                                                                                                                                                                                                                             | Vim                                        | 466  |
| Q9Y2W2 | WBP11_HUMAN  | WW domain-binding protein 11 (WBP-11) (Npw38-binding protein) (NpwBP) (SH3 domain-binding protein SNP70) (Splicing factor that interacts with PQBP-1 and PP1)                                                                                                                        | WBP11 NPWBP SIPP1 SNP70                    | 641  |
| Q9C0J8 | WDR33_HUMAN  | pre-mRNA 3' end processing protein WDR33 (WD repeat-containing protein 33) (WD repeat-containing protein WDC146)                                                                                                                                                                     | WDR33 WDC146                               | 1336 |
| Q8IY57 | YAF2_HUMAN   | YY1-associated factor 2                                                                                                                                                                                                                                                              | YAF2                                       | 180  |
| P67809 | YBOX1_HUMAN  | Nuclease-sensitive element-binding protein 1 (CCAAT-binding transcription factor I subunit A) (CBF-A) (DNA-binding protein B) (DBPB) (Enhancer factor I subunit A) (EFI-A) (Y-box transcription factor) (Y-box-binding protein 1) (YB-1)                                             | YBX1 NSEP1 YB1                             | 324  |
| Q8TBK6 | ZCH10_HUMAN  | Zinc finger CCHC domain-containing protein 10                                                                                                                                                                                                                                        | ZCCHC10                                    | 192  |
| O60315 | ZEB2_HUMAN   | Zinc finger E-box-binding homeobox 2 (Smad-interacting protein 1) (SMADIP1) (Zinc finger homeobox protein 1b)                                                                                                                                                                        | ZEB2 KIAA0569 SIP1 ZFHX1B ZFX1B HRIHFB2411 | 1214 |
| Q9H2Y7 | ZF106_HUMAN  | Zinc finger protein 106 homolog (Zfp-106) (Zinc finger protein 474)                                                                                                                                                                                                                  | ZFP106 SH3BP3 ZNF474                       | 1883 |
| Q15326 | ZMY11_HUMAN  | Zinc finger MYND domain-containing protein 11 (Adenovirus 5 E1A-binding protein) (Protein BS69)                                                                                                                                                                                      | ZMYND11 BS69                               | 562  |
| Q86UD4 | ZN329_HUMAN  | Zinc finger protein 329                                                                                                                                                                                                                                                              | ZNF329                                     | 541  |
| Q8TAQ5 | ZN420_HUMAN  | Zinc finger protein 420                                                                                                                                                                                                                                                              | ZNF420                                     | 688  |
| Q5VIY5 | ZN468_HUMAN  | Zinc finger protein 468                                                                                                                                                                                                                                                              | ZNF468                                     | 522  |
| P17028 | ZNF24_HUMAN  | Zinc finger protein 24 (Retinoic acid suppression protein A) (RSG-A) (Zinc finger and SCAN domain-containing protein 3) (Zinc finger protein 191) (Zinc finger protein KOX17)                                                                                                        | ZNF24 KOX17 ZNF191 ZSCAN3                  | 368  |
| P51814 | ZNF41_HUMAN  | Zinc finger protein 41                                                                                                                                                                                                                                                               | ZNF41                                      | 821  |
| O95218 | ZRAB2_HUMAN  | Zinc finger Ran-binding domain-containing protein 2 (Zinc finger protein 265) (Zinc finger, splicing)                                                                                                                                                                                | ZRANB2 ZIS ZNF265                          | 330  |
| Q3MIH3 | Q3MIH3_HUMAN | Ubiquitin A-52 residue ribosomal protein fusion product 1 (Ubiquitin A-52 residue ribosomal protein fusion product 1, isoform CRA_a) (cDNA, FLJ95576, Homo sapiens ubiquitin A-52 residue ribosomal protein fusionproduct 1 (UBA52), mRNA)                                           | UBA52 hCG_37048                            | 128  |
| Q8N6E6 | Q8N6E6_HUMAN | C21orf66 protein                                                                                                                                                                                                                                                                     | C21orf66                                   | 398  |
| Q8TBK5 | Q8TBK5_HUMAN | 60S ribosomal protein L6                                                                                                                                                                                                                                                             | RPL6                                       | 288  |
| Q5RKT7 | Q5RKT7_HUMAN | Ribosomal protein S27a                                                                                                                                                                                                                                                               | RPS27A                                     | 156  |
| Q13746 | Q13746_HUMAN | Bcr-abl mRNA of acute lymphocytic leukaemia (ALL) patients (Fragment)                                                                                                                                                                                                                |                                            | 386  |
| Q14DJ8 | Q14DJ8_MOUSE | Axin-1 (Axin1 protein)                                                                                                                                                                                                                                                               | Axin1                                      | 832  |
| Q9JLQ4 | Q9JLQ4_MOUSE | Pleiomorphic adenoma gene-like 1 (Pleiomorphic adenoma gene-like 1, isoform CRA_d) (Protein Plag11) (Zinc finger protein ZAC1)                                                                                                                                                       | Plag11 Zac1 AL713985.1-001 mCG_12864       | 704  |
| Q9R0W0 | Q9R0W0_RAT   | Metabotropic glutamate receptor type 1 (Fragment)                                                                                                                                                                                                                                    | Grm1 mGluR1a                               | 84   |
| Q9PST7 | Q9PST7_XENLA | Zinc finger protein XFDL 156                                                                                                                                                                                                                                                         | znf585b                                    | 573  |

**DISORDERED PROTEINS WITH MULTIPLE OCCURENCES IN THE PTEN CANCER INTERACTOME**

| Entry  | Entry name  | Protein names                                                                                                                           | Gene names                                                                                                                                                                                                                                                                                           | Organism             | Length | Gene ontology (GO)                                                                                                                                                                                                                                                                                                                                                                                                                                                                                                                                                                                                                                                                                                                                                                                                                                                                                                                                                                                                                                                                                                                                                                                                                                                                                                                                                                                                                                                                                                                                                                                                                                                                                                                                                                                                                                                                                                                                                                                |
|--------|-------------|-----------------------------------------------------------------------------------------------------------------------------------------|------------------------------------------------------------------------------------------------------------------------------------------------------------------------------------------------------------------------------------------------------------------------------------------------------|----------------------|--------|---------------------------------------------------------------------------------------------------------------------------------------------------------------------------------------------------------------------------------------------------------------------------------------------------------------------------------------------------------------------------------------------------------------------------------------------------------------------------------------------------------------------------------------------------------------------------------------------------------------------------------------------------------------------------------------------------------------------------------------------------------------------------------------------------------------------------------------------------------------------------------------------------------------------------------------------------------------------------------------------------------------------------------------------------------------------------------------------------------------------------------------------------------------------------------------------------------------------------------------------------------------------------------------------------------------------------------------------------------------------------------------------------------------------------------------------------------------------------------------------------------------------------------------------------------------------------------------------------------------------------------------------------------------------------------------------------------------------------------------------------------------------------------------------------------------------------------------------------------------------------------------------------------------------------------------------------------------------------------------------------|
| P61981 | 1433G_HUMAN | 14-3-3 protein gamma<br>(Protein kinase C inhibitor protein 1) (KCIP-1)<br>[Cleaved into: 14-3-3 protein gamma, N-terminally processed] | YWHAG                                                                                                                                                                                                                                                                                                | Homo sapiens (Human) | 247    | G2/M transition of mitotic cell cycle; cytosol; protein kinase C inhibitor activity; protein targeting; regulation of neuron differentiation; regulation of signal transduction; regulation of synaptic plasticity                                                                                                                                                                                                                                                                                                                                                                                                                                                                                                                                                                                                                                                                                                                                                                                                                                                                                                                                                                                                                                                                                                                                                                                                                                                                                                                                                                                                                                                                                                                                                                                                                                                                                                                                                                                |
| Q99933 | BAG1_HUMAN  | BAG family molecular chaperone regulator 1 (BAG-1)<br>(Bcl-2-associated athanogene 1)                                                   | BAG1 HAP                                                                                                                                                                                                                                                                                             | Homo sapiens (Human) | 345    | anti-apoptosis; apoptotic process; cell surface receptor signaling pathway; chaperone cofactor-dependent protein refolding; cytoplasm; cytosol; intermediate filament cytoskeleton; mitochondrion; neuron differentiation; nucleus; perinuclear region of cytoplasm; positive regulation of neuron apoptotic process; positive regulation of transcription from RNA polymerase II promoter; receptor signaling protein activity; response to drug; response to lithium ion; response to nicotine; response to stress                                                                                                                                                                                                                                                                                                                                                                                                                                                                                                                                                                                                                                                                                                                                                                                                                                                                                                                                                                                                                                                                                                                                                                                                                                                                                                                                                                                                                                                                              |
| P38398 | BRCA1_HUMAN | Breast cancer type 1 susceptibility protein (EC 6.3.2.-)<br>(RING finger protein 53)                                                    | BRCA1 RNF53                                                                                                                                                                                                                                                                                          | Homo sapiens (Human) | 1863   | BRCA1-A complex; BRCA1-BARD1 complex; DNA damage response, signal transduction by p53 class mediator resulting in transcription of p21 class mediator; DNA damage response, signal transduction resulting in induction of apoptosis; DNA replication; G2/M transition DNA damage checkpoint; RNA binding; androgen receptor signaling pathway; apoptotic process; brain development; cellular response to indole-3-methanol; centrosome cycle; chordate embryonic development; chromosome segregation; condensed nuclear chromosome; damaged DNA binding; dosage compensation by inactivation of X chromosome; double-strand break repair via homologous recombination; fatty acid biosynthetic process; gamma-tubulin ring complex; mitochondrial matrix; negative regulation of centriole replication; negative regulation of fatty acid biosynthetic process; negative regulation of histone H3-K9 methylation; negative regulation of transcription, DNA-dependent; nucleoplasm; plasma membrane; positive regulation of DNA repair; positive regulation of cell cycle arrest; positive regulation of histone H3-K4 methylation; positive regulation of histone H3-K9 acetylation; positive regulation of histone H4-K16 acetylation; positive regulation of histone H4-K20 methylation; positive regulation of protein ubiquitination; positive regulation of transcription from RNA polymerase II promoter; postreplication repair; protein K6-linked ubiquitination; protein autoubiquitination; regulation of cell motility; regulation of cell proliferation; regulation of transcription from RNA polymerase III promoter; response to estradiol stimulus; response to estrogen stimulus; response to ionizing radiation; response to lipid; response to nutrient; ribonucleoprotein complex; ruffle; substrate adhesion-dependent cell spreading; transcription coactivator activity; transcription regulatory region DNA binding; ubiquitin-protein ligase activity; zinc ion binding |
| P62158 | CALM_HUMAN  | Calmodulin (CaM)                                                                                                                        | CALM1 CALM CAM CAM1;<br>CALM2 CAM2 CAMB;<br>CALM3 CALML2 CAM3<br>CAMC CAMIII                                                                                                                                                                                                                         | Homo sapiens (Human) | 149    | G-protein coupled receptor signaling pathway; activation of phospholipase C activity; calcium ion binding; centrosome; cytosol; epidermal growth factor receptor signaling pathway; extracellular region; fibroblast growth factor receptor signaling pathway; glucose metabolic process; glycogen catabolic process; muscle contraction; negative regulation of ryanodine-sensitive calcium-release channel activity; nerve growth factor receptor signaling pathway; nitric oxide metabolic process; nucleoplasm; plasma membrane; platelet activation; platelet degranulation; positive regulation of ryanodine-sensitive calcium-release channel activity; regulation of cytokinesis; regulation of nitric-oxide synthase activity; regulation of release of sequestered calcium ion into cytosol by sarcoplasmic reticulum; response to calcium ion; small molecule metabolic process; spindle microtubule; spindle pole; synaptic transmission                                                                                                                                                                                                                                                                                                                                                                                                                                                                                                                                                                                                                                                                                                                                                                                                                                                                                                                                                                                                                                              |
| P09496 | CLCA_HUMAN  | Clathrin light chain A (Lca)                                                                                                            | CLTA                                                                                                                                                                                                                                                                                                 | Homo sapiens (Human) | 248    | axon guidance; cellular membrane organization; clathrin coat; clathrin coat of coated pit; clathrin coat of trans-Golgi network vesicle; clathrin-coated endocytic vesicle membrane; cytoplasmic membrane-bounded vesicle; cytosol; endocytosis; epidermal growth factor receptor signaling pathway; intracellular protein transport; negative regulation of epidermal growth factor receptor signaling pathway; nerve growth factor receptor signaling pathway; peptide binding; plasma membrane; post-Golgi vesicle-mediated transport; structural molecule activity                                                                                                                                                                                                                                                                                                                                                                                                                                                                                                                                                                                                                                                                                                                                                                                                                                                                                                                                                                                                                                                                                                                                                                                                                                                                                                                                                                                                                            |
| Q9UER7 | DAXX_HUMAN  | Death domain-associated protein 6 (Daxx) (hDaxx)<br>(ETS1-associated protein 1) (EAP1)<br>(Fas death domain-associated protein)         | DAXX BING2 DAP6                                                                                                                                                                                                                                                                                      | Homo sapiens (Human) | 740    | PML body; activation of JUN kinase activity; androgen receptor signaling pathway; apoptotic process; cell body; cell cortex; chromosome, centromeric region; cytokinesis after mitosis; cytosol; heterochromatin; induction of apoptosis via death domain receptors; interspecies interaction between organisms; negative regulation of transcription, DNA-dependent; neuron projection; nucleolus; receptor signaling protein activity; regulation of protein ubiquitination; transcription, DNA-dependent                                                                                                                                                                                                                                                                                                                                                                                                                                                                                                                                                                                                                                                                                                                                                                                                                                                                                                                                                                                                                                                                                                                                                                                                                                                                                                                                                                                                                                                                                       |
| P62805 | H4_HUMAN    | Histone H4                                                                                                                              | HIST1H4A H4/A H4FA;<br>HIST1H4B H4/I H4FI; HIST1H4C H4/G H4FG; HIST1H4D H4/B H4FB; HIST1H4E H4/J H4FJ; HIST1H4F H4/C H4FC;<br>HIST1H4H H4/H H4FH;<br>HIST1H4I H4/M H4FM; HIST1H4J H4/E H4FE; HIST1H4K H4/D H4FD; HIST1H4L H4/K H4FK; HIST2H4A H4/N H4F2<br>H4FN HIST2H4; HIST2H4B H4/O H4FO; HIST4H4 | Homo sapiens (Human) | 103    | CenH3-containing nucleosome assembly at centromere; DNA binding; extracellular region; negative regulation of megakaryocyte differentiation; nucleoplasm; nucleosome; phosphatidylinositol-mediated signaling; telomere maintenance                                                                                                                                                                                                                                                                                                                                                                                                                                                                                                                                                                                                                                                                                                                                                                                                                                                                                                                                                                                                                                                                                                                                                                                                                                                                                                                                                                                                                                                                                                                                                                                                                                                                                                                                                               |
| P46821 | MAP1B_HUMAN | Microtubule-associated protein 1B (MAP-1B)<br>[Cleaved into: MAP1B heavy chain; MAP1 light chain LC1]                                   | MAP1B                                                                                                                                                                                                                                                                                                | Homo sapiens (Human) | 2468   | axon; axon extension involved in development; cell junction; cellular process; central nervous system development; cytosol; dendrite development; developmental maturation; embryo development; establishment of monopolar cell polarity; growth cone; induction of synaptic plasticity by chemical substance; microtubule; microtubule associated complex; microtubule bundle formation; mitochondrion transport along microtubule; negative regulation of intracellular transport; negative regulation of microtubule depolymerization; perikaryon; perinuclear region of cytoplasm; peripheral nervous system axon regeneration; plasma membrane; positive regulation of axon extension; positive regulation of microtubule polymerization; positive regulation of neuron differentiation; postsynaptic density; response to carbohydrate stimulus; response to drug; response to estradiol stimulus; response to inorganic substance; response to insecticide; response to mechanical stimulus; response to peptide hormone stimulus; response to vitamin A; soluble fraction; structural molecule activity; synapse assembly                                                                                                                                                                                                                                                                                                                                                                                                                                                                                                                                                                                                                                                                                                                                                                                                                                                                 |
| Q00987 | MDM2_HUMAN  | E3 ubiquitin-protein ligase                                                                                                             | MDM2                                                                                                                                                                                                                                                                                                 | Homo sapiens (Human) | 491    | DNA damage response, signal transduction by p53 class mediator resulting in cell cycle arrest; cellular response to hypoxia; cytosol; endocytic vesicle membrane;                                                                                                                                                                                                                                                                                                                                                                                                                                                                                                                                                                                                                                                                                                                                                                                                                                                                                                                                                                                                                                                                                                                                                                                                                                                                                                                                                                                                                                                                                                                                                                                                                                                                                                                                                                                                                                 |

|        |             |                                                                                                                                                                                                                                         |                                  |                      |                                                                                                                                                                                                                                                                                                                                                                                                                                                                                                                                                                                                                                                                                                                                                                                                                                                                                                                                                                                                                                                                                                                                                                                                                                                                                                                                                                                                                                                                                                                                                                                                                                                                                                                                                                                                                                                                                                                                                                                                                                                                                                                                                                                                                                                                                                              |
|--------|-------------|-----------------------------------------------------------------------------------------------------------------------------------------------------------------------------------------------------------------------------------------|----------------------------------|----------------------|--------------------------------------------------------------------------------------------------------------------------------------------------------------------------------------------------------------------------------------------------------------------------------------------------------------------------------------------------------------------------------------------------------------------------------------------------------------------------------------------------------------------------------------------------------------------------------------------------------------------------------------------------------------------------------------------------------------------------------------------------------------------------------------------------------------------------------------------------------------------------------------------------------------------------------------------------------------------------------------------------------------------------------------------------------------------------------------------------------------------------------------------------------------------------------------------------------------------------------------------------------------------------------------------------------------------------------------------------------------------------------------------------------------------------------------------------------------------------------------------------------------------------------------------------------------------------------------------------------------------------------------------------------------------------------------------------------------------------------------------------------------------------------------------------------------------------------------------------------------------------------------------------------------------------------------------------------------------------------------------------------------------------------------------------------------------------------------------------------------------------------------------------------------------------------------------------------------------------------------------------------------------------------------------------------------|
|        |             | Mdm2 (EC 6.3.2.-)<br>(Double minute 2 protein)<br>(Hdm2) (Oncoprotein Mdm2)<br>(p53-binding protein Mdm2)                                                                                                                               |                                  |                      | epidermal growth factor receptor signaling pathway; establishment of protein localization; fibroblast growth factor receptor signaling pathway; interspecies interaction between organisms; negative regulation of DNA damage response, signal transduction by p53 class mediator; negative regulation of apoptotic process; negative regulation of cell cycle arrest; negative regulation of transcription from RNA polymerase II promoter; nerve growth factor receptor signaling pathway; nucleolus; nucleoplasm; peptidyl-lysine modification; phosphatidylinositol-mediated signaling; plasma membrane; positive regulation of cell proliferation; positive regulation of mitotic cell cycle; positive regulation of proteasomal ubiquitin-dependent protein catabolic process; protein complex; protein complex assembly; protein destabilization; protein localization to nucleus; protein ubiquitination involved in ubiquitin-dependent protein catabolic process; response to antibiotic; synaptic transmission; traversing start control point of mitotic cell cycle; ubiquitin-protein ligase activity; zinc ion binding                                                                                                                                                                                                                                                                                                                                                                                                                                                                                                                                                                                                                                                                                                                                                                                                                                                                                                                                                                                                                                                                                                                                                                         |
| P06748 | NPM_HUMAN   | Nucleophosmin (NPM)<br>(Nucleolar phosphoprotein B23)<br>(Nucleolar protein NO38)<br>(Numatrin)                                                                                                                                         | NPM1 NPM                         | Homo sapiens (Human) | 294 CenH3-containing nucleosome assembly at centromere; DNA repair; RNA binding; anti-apoptosis; cell aging; centrosome cycle; interspecies interaction between organisms; intracellular protein transport; negative regulation of cell proliferation; negative regulation of centrosome duplication; nucleocytoplasmic transport; nucleolus; nucleoplasm; positive regulation of NF-kappaB transcription factor activity; protein oligomerization; regulation of centriole replication; regulation of endodeoxyribonuclease activity; regulation of endoribonuclease activity; ribonucleoprotein complex; ribosomal large subunit binding; ribosomal small subunit binding; ribosome assembly; signal transduction; spindle pole centrosome; transcription coactivator activity                                                                                                                                                                                                                                                                                                                                                                                                                                                                                                                                                                                                                                                                                                                                                                                                                                                                                                                                                                                                                                                                                                                                                                                                                                                                                                                                                                                                                                                                                                                             |
| P19338 | NUCL_HUMAN  | Nucleolin (Protein C23)                                                                                                                                                                                                                 | NCL                              | Homo sapiens (Human) | 710 RNA binding; angiogenesis; cell cortex; nucleolus; nucleoplasm; nucleotide binding; ribonucleoprotein complex; telomeric DNA binding                                                                                                                                                                                                                                                                                                                                                                                                                                                                                                                                                                                                                                                                                                                                                                                                                                                                                                                                                                                                                                                                                                                                                                                                                                                                                                                                                                                                                                                                                                                                                                                                                                                                                                                                                                                                                                                                                                                                                                                                                                                                                                                                                                     |
| Q13526 | PIN1_HUMAN  | Peptidyl-prolyl cis-trans isomerase NIMA-interacting 1 (EC 5.2.1.8) (Peptidyl-prolyl cis-trans isomerase Pin1) (PPIase Pin1) (Rotamase Pin1)                                                                                            | PIN1                             | Homo sapiens (Human) | 163 cell cycle; cytokine-mediated signaling pathway; cytoplasm; innate immune response; midbody; negative regulation of ERK1 and ERK2 cascade; negative regulation of cell motility; negative regulation of transforming growth factor beta receptor signaling pathway; negative regulation of type I interferon production; nuclear speck; nucleoplasm; peptidyl-prolyl cis-trans isomerase activity; positive regulation of Rho GTPase activity; positive regulation of protein phosphorylation; positive regulation of ubiquitin-protein ligase activity; protein folding; regulation of cell proliferation; regulation of cytokinesis; regulation of mitosis; regulation of pathway-restricted SMAD protein phosphorylation                                                                                                                                                                                                                                                                                                                                                                                                                                                                                                                                                                                                                                                                                                                                                                                                                                                                                                                                                                                                                                                                                                                                                                                                                                                                                                                                                                                                                                                                                                                                                                              |
| Q8WXF1 | PSPC1_HUMAN | Paraspeckle component 1 (Paraspeckle protein 1)                                                                                                                                                                                         | PSPC1 PSP1                       | Homo sapiens (Human) | 523 RNA binding; cytoplasm; nuclear matrix; nuclear speck; nucleolus; nucleotide binding; paraspeckles; regulation of transcription, DNA-dependent; transcription, DNA-dependent                                                                                                                                                                                                                                                                                                                                                                                                                                                                                                                                                                                                                                                                                                                                                                                                                                                                                                                                                                                                                                                                                                                                                                                                                                                                                                                                                                                                                                                                                                                                                                                                                                                                                                                                                                                                                                                                                                                                                                                                                                                                                                                             |
| P26043 | RADI_MOUSE  | Radixin (ESP10)                                                                                                                                                                                                                         | Rdx                              | Mus musculus (Mouse) | 583 actin filament capping; apical part of cell; apical protein localization; cleavage furrow; cytoplasm; cytoskeleton; extrinsic to membrane; filopodium; lamellipodium; microvillus assembly; plasma membrane; ruffle; stereocilium                                                                                                                                                                                                                                                                                                                                                                                                                                                                                                                                                                                                                                                                                                                                                                                                                                                                                                                                                                                                                                                                                                                                                                                                                                                                                                                                                                                                                                                                                                                                                                                                                                                                                                                                                                                                                                                                                                                                                                                                                                                                        |
| Q9H6Z4 | RANB3_HUMAN | Ran-binding protein 3 (RanBP3)                                                                                                                                                                                                          | RANBP3                           | Homo sapiens (Human) | 567 cytoplasm; intracellular transport; nucleus; protein transport                                                                                                                                                                                                                                                                                                                                                                                                                                                                                                                                                                                                                                                                                                                                                                                                                                                                                                                                                                                                                                                                                                                                                                                                                                                                                                                                                                                                                                                                                                                                                                                                                                                                                                                                                                                                                                                                                                                                                                                                                                                                                                                                                                                                                                           |
| P62987 | RL40_HUMAN  | Ubiquitin-60S ribosomal protein L40 (CEP52) (Ubiquitin A-52 residue ribosomal protein fusion product 1) [Cleaved into: Ubiquitin; 60S ribosomal protein L40]                                                                            | UBA52 UBCEP2                     | Homo sapiens (Human) | 128 DNA damage response, signal transduction by p53 class mediator resulting in cell cycle arrest; DNA repair; G1 phase of mitotic cell cycle; G1/S transition of mitotic cell cycle; I-kappaB kinase/NF-kappaB cascade; JNK cascade; M/G1 transition of mitotic cell cycle; MyD88-dependent toll-like receptor signaling pathway; Notch receptor processing; Notch signaling pathway; S phase of mitotic cell cycle; SRP-dependent cotranslational protein targeting to membrane; T cell receptor signaling pathway; TRIF-dependent toll-like receptor signaling pathway; Toll signaling pathway; activation of MAPK activity; anaphase-promoting complex-dependent proteasomal ubiquitin-dependent protein catabolic process; anti-apoptosis; antigen processing and presentation of exogenous peptide antigen via MHC class I, TAP-dependent; apoptotic process; cellular membrane organization; cytokine-mediated signaling pathway; cytosol; cytosolic large ribosomal subunit; egress of virus within host cell; endocytic vesicle membrane; endosomal transport; endosome membrane; epidermal growth factor receptor signaling pathway; fibroblast growth factor receptor signaling pathway; induction of apoptosis by extracellular signal; innate immune response; negative regulation of epidermal growth factor receptor signaling pathway; negative regulation of type I interferon production; negative regulation of ubiquitin-protein ligase activity involved in mitotic cell cycle; nerve growth factor receptor signaling pathway; nuclear-transcribed mRNA catabolic process, nonsense-mediated decay; nucleoplasm; nucleotide-binding oligomerization domain containing signaling pathway; plasma membrane; positive regulation of I-kappaB kinase/NF-kappaB cascade; positive regulation of NF-kappaB transcription factor activity; positive regulation of ubiquitin-protein ligase activity involved in mitotic cell cycle; protein polyubiquitination; ribosome; structural constituent of ribosome; toll-like receptor 1 signaling pathway; toll-like receptor 2 signaling pathway; toll-like receptor 3 signaling pathway; toll-like receptor 4 signaling pathway; translation; translational elongation; translational initiation; translational termination; viral transcription |
| P51991 | ROA3_HUMAN  | Heterogeneous nuclear ribonucleoprotein A3 (hnRNP A3)                                                                                                                                                                                   | HNRNPA3 HNRPA3                   | Homo sapiens (Human) | 378 RNA binding; catalytic step 2 spliceosome; nuclear mRNA splicing, via spliceosome; nucleolus; nucleoplasm; nucleotide binding                                                                                                                                                                                                                                                                                                                                                                                                                                                                                                                                                                                                                                                                                                                                                                                                                                                                                                                                                                                                                                                                                                                                                                                                                                                                                                                                                                                                                                                                                                                                                                                                                                                                                                                                                                                                                                                                                                                                                                                                                                                                                                                                                                            |
| Q13464 | ROCK1_HUMAN | Rho-associated protein kinase 1 (EC 2.7.11.1) (Renal carcinoma antigen NY-REN-35) (Rho-associated, coiled-coil-containing protein kinase 1) (Rho-associated, coiled-coil-containing protein kinase I) (ROCK-I) (p160 ROCK-1) (p160ROCK) | ROCK1                            | Homo sapiens (Human) | 1354 ATP binding; Golgi membrane; Rho protein signal transduction; actin cytoskeleton organization; axon guidance; bleb; bleb assembly; cellular component disassembly involved in apoptotic process; centriole; cytokinesis; cytosol; leukocyte tethering or rolling; membrane to membrane docking; metal ion binding; negative regulation of angiogenesis; negative regulation of neuron apoptotic process; phospholipid binding; protein serine/threonine kinase activity; regulation of cell motility; regulation of establishment of cell polarity; regulation of focal adhesion assembly; regulation of keratinocyte differentiation; regulation of stress fiber assembly; smooth muscle contraction                                                                                                                                                                                                                                                                                                                                                                                                                                                                                                                                                                                                                                                                                                                                                                                                                                                                                                                                                                                                                                                                                                                                                                                                                                                                                                                                                                                                                                                                                                                                                                                                   |
| P08621 | RU17_HUMAN  | U1 small nuclear ribonucleoprotein 70 kDa (U1 snRNP 70 kDa) (U1-70K) (snRNP70)                                                                                                                                                          | SNRNP70 RNPUIZ RPU1 SNRP70 U1API | Homo sapiens (Human) | 437 RNA binding; nuclear mRNA splicing, via spliceosome; nucleoplasm; nucleotide binding; regulation of RNA splicing; spliceosomal complex                                                                                                                                                                                                                                                                                                                                                                                                                                                                                                                                                                                                                                                                                                                                                                                                                                                                                                                                                                                                                                                                                                                                                                                                                                                                                                                                                                                                                                                                                                                                                                                                                                                                                                                                                                                                                                                                                                                                                                                                                                                                                                                                                                   |
| Q8N488 | RYBP_HUMAN  | RING1 and YY1-binding protein (Apoptin-associating protein 1) (APAP-1) (Death effector domain-associated factor) (DED-associated factor)                                                                                                | RYBP DEDAF YEAF1                 | Homo sapiens (Human) | 228 DNA binding; apoptotic process; cytoplasm; histone H2A monoubiquitination; multicellular organismal development; negative regulation of transcription from RNA polymerase II promoter; nucleoplasm; transcription corepressor activity; transcription, DNA-dependent; zinc ion binding                                                                                                                                                                                                                                                                                                                                                                                                                                                                                                                                                                                                                                                                                                                                                                                                                                                                                                                                                                                                                                                                                                                                                                                                                                                                                                                                                                                                                                                                                                                                                                                                                                                                                                                                                                                                                                                                                                                                                                                                                   |



|        |              |                                                                                                                                                                                                                     |                                            |                         |                                                                                                                                                                                                                                                                                                                                                                                                                                                                                                                                                                                                                                                                                                                         |
|--------|--------------|---------------------------------------------------------------------------------------------------------------------------------------------------------------------------------------------------------------------|--------------------------------------------|-------------------------|-------------------------------------------------------------------------------------------------------------------------------------------------------------------------------------------------------------------------------------------------------------------------------------------------------------------------------------------------------------------------------------------------------------------------------------------------------------------------------------------------------------------------------------------------------------------------------------------------------------------------------------------------------------------------------------------------------------------------|
|        |              | (YY1 and E4TF1-associated factor 1)                                                                                                                                                                                 |                                            |                         |                                                                                                                                                                                                                                                                                                                                                                                                                                                                                                                                                                                                                                                                                                                         |
| Q13435 | SF3B2_HUMAN  | Splicing factor 3B subunit 2 (Pre-mRNA-splicing factor SF3b 145 kDa subunit) (SF3b145) (SF3b150) (Spliceosome-associated protein 145) (SAP 145)                                                                     | SF3B2 SAP145                               | Homo sapiens (Human)    | 895 U12-type spliceosomal complex; catalytic step 2 spliceosome; interspecies interaction between organisms; nuclear mRNA splicing, via spliceosome; nucleic acid binding; nucleoplasm                                                                                                                                                                                                                                                                                                                                                                                                                                                                                                                                  |
| Q92922 | SMRC1_HUMAN  | SWI/SNF complex subunit SMARCC1 (BRG1-associated factor 155) (BAF155) (SWI/SNF complex 155 kDa subunit) (SWI/SNF-related matrix-associated actin-dependent regulator of chromatin subfamily C member 1)             | SMARCC1 BAF155                             | Homo sapiens (Human)    | 1105 DNA binding; SWI/SNF complex; WINAC complex; XY body; chromatin binding; chromatin remodeling; insulin receptor signaling pathway; nBAF complex; nervous system development; npBAF complex; nucleosome disassembly; organ morphogenesis; positive regulation of transcription from RNA polymerase II promoter; positive regulation of transcription, DNA-dependent; regulation of transcription from RNA polymerase II promoter; soluble fraction; transcription coactivator activity; transcription, DNA-dependent                                                                                                                                                                                                |
| Q13573 | SNW1_HUMAN   | SNW domain-containing protein SNW1 SKIIP SKIP 1 (Nuclear protein SkiP) (Nuclear receptor coactivator NCoA-62) (Ski-interacting protein)                                                                             |                                            | Homo sapiens (Human)    | 536 Notch signaling pathway; catalytic step 2 spliceosome; cellular response to retinoic acid; chromatin; negative regulation of transcription, DNA-dependent; nuclear mRNA splicing, via spliceosome; nucleoplasm; positive regulation of neurogenesis; positive regulation of transcription from RNA polymerase II promoter; retinoic acid receptor signaling pathway; transcription initiation from RNA polymerase II promoter                                                                                                                                                                                                                                                                                       |
| Q05066 | SRY_HUMAN    | Sex-determining region Y protein (Testis-determining factor)                                                                                                                                                        | SRY TDF                                    | Homo sapiens (Human)    | 204 DNA binding; RNA polymerase II distal enhancer sequence-specific DNA binding transcription factor activity; cell differentiation; cytoplasm; male sex determination; nuclear speck; nucleus; positive regulation of male gonad development; positive regulation of transcription, DNA-dependent; sex differentiation                                                                                                                                                                                                                                                                                                                                                                                                |
| P63165 | SUMO1_HUMAN  | Small ubiquitin-related modifier (SUMO-1) (GAP-modifying protein 1) (GMP1) (SMT3 homolog 3) (Sentrin) (Ubiquitin-homology domain protein PIC1) (Ubiquitin-like protein SMT3C) (Smt3C) (Ubiquitin-like protein UBL1) | SUMO1 SMT3C SMT3H3 UBL1                    | Homo sapiens (Human)    | 101 DNA repair; SUMO ligase activity; cytoplasm; dendrite; interferon-gamma-mediated signaling pathway; negative regulation of DNA binding; negative regulation of sequence-specific DNA binding transcription factor activity; negative regulation of transcription, DNA-dependent; nuclear membrane; nuclear pore; nuclear speck; nucleoplasm; palate development; positive regulation of proteasomal ubiquitin-dependent protein catabolic process; positive regulation of protein complex assembly; protein sumoylation; regulation of interferon-gamma-mediated signaling pathway; regulation of protein localization; synaps                                                                                      |
| P25490 | TTY1_HUMAN   | Transcriptional repressor protein YY1 INO80S YY1 (Delta transcription factor) (INO80 complex subunit S) (NF-E1) (Yin and yang 1) (YY-1)                                                                             |                                            | Homo sapiens (Human)    | 414 Ino80 complex; PcG protein complex; RNA binding; RNA localization; anterior/posterior pattern specification; camera-type eye morphogenesis; cell differentiation; cellular response to UV; chromosome organization; double-strand break repair via homologous recombination; four-way junction DNA binding; negative regulation of transcription from RNA polymerase II promoter; nuclear matrix; plasma membrane; response to UV-C; sequence-specific DNA binding transcription factor activity; spermatogenesis; transcription coactivator activity; transcription corepressor activity; transcription factor complex transcription regulatory region DNA binding; transcription, DNA-dependent; zinc ion binding |
| P08670 | VIME_HUMAN   | Vimentin                                                                                                                                                                                                            | VIM                                        | Homo sapiens (Human)    | 466 cellular component disassembly involved in apoptotic process; cytosol; intermediate filament; interspecies interaction between organisms; muscle filament sliding; peroxisome structural constituent of cytoskeleton                                                                                                                                                                                                                                                                                                                                                                                                                                                                                                |
| O60315 | ZEB2_HUMAN   | Zinc finger E-box-binding homeobox 2 (Smad-interacting protein 1) (SMADI1) (Zinc finger homeobox protein 1b)                                                                                                        | ZEB2 KIAA0569 SIP1 ZFHX1B ZFX1B HRIHFB2411 | Homo sapiens (Human)    | 1214 cell proliferation in forebrain; cytoplasm; hippocampus development; nervous system development; neural crest cell migration; neural tube closure; nucleolus; phosphatase regulator activity; positive regulation of JUN kinase activity; positive regulation of Wnt receptor signaling pathway; sequence-specific DNA binding; sequence-specific DNA binding transcription factor activity; somitogenesis; transcription, DNA-dependent; zinc ion binding                                                                                                                                                                                                                                                         |
| Q15326 | ZMY11_HUMAN  | Zinc finger MYND domain-containing protein 11 (Adenovirus 5 E1A-binding protein) (Protein BS69)                                                                                                                     | ZMYND11 BS69                               | Homo sapiens (Human)    | 562 DNA binding; cell cycle; cell proliferation; cytoplasm; interspecies interaction between organisms; negative regulation of I-kappaB kinase/NF-kappaB cascade; negative regulation of JNK cascade; negative regulation of extrinsic apoptotic signaling pathway; negative regulation of transcription from RNA polymerase II promoter; nucleus; transcription, DNA-dependent; zinc ion binding                                                                                                                                                                                                                                                                                                                       |
| Q5RKT7 | Q5RKT7_HUMAN | Ribosomal protein S27a                                                                                                                                                                                              | RPS27A                                     | Homo sapiens (Human)    | 156 ribosome; structural constituent of ribosome; translation                                                                                                                                                                                                                                                                                                                                                                                                                                                                                                                                                                                                                                                           |
| Q9R0W0 | Q9R0W0_RAT   | Metabotropic glutamate receptor type 1 (Fragment)                                                                                                                                                                   | Grm1 mGluR1a                               | Rattus norvegicus (Rat) | 84 activation of MAPK activity; activation of MAPKK activity; cellular response to electrical stimulus; locomotory behavior; microsome; nucleus; postsynaptic density; receptor activity; regulation of MAPK cascade; regulation of sensory perception of pain; sensory perception of pain                                                                                                                                                                                                                                                                                                                                                                                                                              |



**SUPPLEMENTARY TABLE S7**

**Derivation of PTEN associated cancer hubs using a human cancer signaling map**

| +           | activation           |                  |   |
|-------------|----------------------|------------------|---|
| -           | inhibition           |                  |   |
| 0           | physical interaction |                  |   |
| <b>From</b> | <b>To</b>            | <b>Link_Type</b> |   |
| BRCA1       | MRE11A               | +                |   |
| BRCA1       | MRE11A               |                  | 0 |
| BRCA1       | FHL2                 | +                |   |
| BRCA1       | ESR1                 |                  | 0 |
| BRCA1       | AKT1                 | +                |   |
| BRCA1       | RAD50                | +                |   |
| BRCA1       | RAD50                | +                |   |
| BRCA1       | PRKG1                |                  | 0 |
| BRCA1       | RBL2                 | +                |   |
| BRCA1       | ATM                  | +                |   |
| BRCA1       | ATM                  | +                |   |
| BRCA1       | BARD1                |                  | 0 |
| BRCA1       | BARD1                | -                |   |
| BRCA1       | CCND1                | +                |   |
| BRCA1       | XIST                 | +                |   |
| BRCA1       | RBBP8                | +                |   |
| BRCA1       | RBBP8                | +                |   |
| BRCA1       | NBN                  |                  | 0 |
| BRCA1       | NBN                  | +                |   |
| BRCA1       | H2AFX                | -                |   |
| BRCA1       | TFDP1                |                  | 0 |
| BRCA1       | NFKB1                |                  | 0 |
| BRCA1       | MDC1                 | +                |   |
| BRCA1       | MDC1                 | +                |   |
| BRCA1       | NPM1                 |                  | 0 |
| BRCA1       | CCNE1                | +                |   |
| BRCA1       | RPA2                 | +                |   |
| BRCA1       | FANCI                | +                |   |
| BRCA1       | E2F4                 | +                |   |
| BRCA1       | POLR2K               | -                |   |
| BRCA1       | POU2F1               | -                |   |
| BRCA1       | ATF2                 | +                |   |
| BRCA1       | IGF1R                | +                |   |
| BRCA1       | BAP1                 | +                |   |
| BRCA1       | MAPK3                | +                |   |
| BRCA1       | UBE2T                | +                |   |
| BRCA1       | EZH2                 |                  | 0 |
| BRCA1       | UBB                  |                  | 0 |
| BRCA1       | ATR                  | -                |   |
| BRCA1       | LMO4                 | +                |   |
| BRCA1       | PGR                  | +                |   |
| BRCA1       | S100A7               | +                |   |
| BRCA1       | GADD45A              | +                |   |
| BRCA1       | CYP19A1              | -                |   |
| BRCA1       | E2F6                 |                  | 0 |
| BRCA1       | AR                   | -                |   |
| BRCA1       | AR                   | -                |   |
| BRCA1       | MAPK8                | +                |   |
| BRCA1       | TREX1                | -                |   |
| BRCA1       | KLK3                 | +                |   |
| BRCA1       | CDKN1B               |                  | 0 |
| BRCA1       | NF1                  |                  | 0 |
| BRCA1       | FANCD2               | +                |   |
| BRCA1       | MAP3K3               |                  | 0 |
| BRCA1       | ECM1                 |                  | 0 |
| BRCA1       | TP53                 | +                |   |
| BRCA1       | RBL1                 | +                |   |
| BRCA1       | CHEK2                | -                |   |
| BRCA1       | PLK3                 | -                |   |
| BRCA1       | TFDP2                | -                |   |
| BRCA1       | RAD51                |                  | 0 |
| BRCA1       | TP53BP1              | -                |   |
| BRCA1       | SMAD3                |                  | 0 |
| BRCA1       | CDK2                 | +                |   |
| DAXX        | AKT1                 |                  | 0 |

|       |          |   |   |
|-------|----------|---|---|
| DAXX  | CASP8    | + |   |
| DAXX  | CASP8    | + |   |
| DAXX  | STAT3    | + |   |
| DAXX  | DFFA     | + |   |
| DAXX  | HIPK1    | + |   |
| DAXX  | TGFBR2   | - |   |
| DAXX  | TGFBR2   | + |   |
| DAXX  | MAP2K4   |   | 0 |
| DAXX  | MAP2K6   |   | 0 |
| DAXX  | MAP2K3   | + |   |
| DAXX  | SLC9A1   | + |   |
| DAXX  | RIPK1    | + |   |
| DAXX  | SMAD4    | - |   |
| DAXX  | TGFB1    | + |   |
| DAXX  | CDK5     | + |   |
| DAXX  | TNFRSF1A | + |   |
| DAXX  | TSG101   | - |   |
| DAXX  | MDM2     | - |   |
| DAXX  | CFLAR    | + |   |
| DAXX  | RIPK2    | + |   |
| DAXX  | USP7     |   | 0 |
| DAXX  | FLT1     |   | 0 |
| DAXX  | FADD     | + |   |
| DAXX  | FADD     | + |   |
| DAXX  | TGFBR1   |   | 0 |
| DAXX  | MAPKAPK5 |   | 0 |
| DAXX  | DMAP1    |   | 0 |
| DAXX  | AR       |   | 0 |
| DAXX  | PRKCZ    |   | 0 |
| DAXX  | FAF1     |   | 0 |
| DAXX  | FAF1     |   | 0 |
| DAXX  | TNNI3K   |   | 0 |
| DAXX  | PAK1     |   | 0 |
| DAXX  | S100B    |   | 0 |
| DAXX  | NR3C1    | - |   |
| DAXX  | FAS      | + |   |
| DAXX  | FAS      |   | 0 |
| DAXX  | FASLG    |   | 0 |
| DAXX  | HSPB1    | - |   |
| DAXX  | MAP2K7   | - |   |
| DAXX  | TP53     | - |   |
| DAXX  | PRKACA   | + |   |
| DAXX  | BID      | + |   |
| DAXX  | CASP10   |   | 0 |
| DAXX  | CASP10   | + |   |
| DAXX  | MAP3K5   | + |   |
| DAXX  | MAP3K5   | - |   |
| DAXX  | MAPK10   | + |   |
| DAXX  | MAP3K7   | + |   |
| SMAD2 | CREBBP   |   | 0 |
| SMAD2 | CREBBP   |   | 0 |
| SMAD2 | SMAD2    |   | 0 |
| SMAD2 | SMAD2    | - |   |
| SMAD2 | KAT2B    |   | 0 |
| SMAD2 | KAT2B    |   | 0 |
| SMAD2 | DVL1     | + |   |
| SMAD2 | ESR1     |   | 0 |
| SMAD2 | CTDSP2   | + |   |
| SMAD2 | PARD3    | + |   |
| SMAD2 | MYC      | + |   |
| SMAD2 | RBL2     |   | 0 |
| SMAD2 | STAMBPL1 | - |   |
| SMAD2 | CDKN2B   |   | 0 |
| SMAD2 | SP1      |   | 0 |
| SMAD2 | NUP153   |   | 0 |
| SMAD2 | MEF2C    |   | 0 |
| SMAD2 | INHBE    | + |   |
| SMAD2 | INHBE    | + |   |
| SMAD2 | CDC16    |   | 0 |
| SMAD2 | TGFB2    | - |   |
| SMAD2 | TGFB2    | - |   |
| SMAD2 | SNIP1    | + |   |
| SMAD2 | SNIP1    |   | 0 |
| SMAD2 | PITX2    | + |   |

|       |           |   |   |
|-------|-----------|---|---|
| SMAD2 | CTBP1     |   | 0 |
| SMAD2 | NUP214    |   | 0 |
| SMAD2 | SAP18     | - |   |
| SMAD2 | FOXO4     |   | 0 |
| SMAD2 | CSF2      | + |   |
| SMAD2 | ACVR1     | - |   |
| SMAD2 | SIN3A     |   | 0 |
| SMAD2 | SKIL      | + |   |
| SMAD2 | TGFBR2    | + |   |
| SMAD2 | TGFBR2    |   | 0 |
| SMAD2 | FKBP1A    | + |   |
| SMAD2 | TFDP1     |   | 0 |
| SMAD2 | ZBTB17    | + |   |
| SMAD2 | RBBP4     | + |   |
| SMAD2 | ERBB2IP   |   | 0 |
| SMAD2 | ERBB2IP   | - |   |
| SMAD2 | HDAC1     |   | 0 |
| SMAD2 | FOXG1     |   | 0 |
| SMAD2 | SKP1      |   | 0 |
| SMAD2 | CDKN1A    |   | 0 |
| SMAD2 | CTNNB1    |   | 0 |
| SMAD2 | E2F4      |   | 0 |
| SMAD2 | SMAD7     | - |   |
| SMAD2 | SMAD7     | - |   |
| SMAD2 | CTDSPL    |   | 0 |
| SMAD2 | GPC1      |   | 0 |
| SMAD2 | SMAD4     |   | 0 |
| SMAD2 | MAX       |   | 0 |
| SMAD2 | CUL1      |   | 0 |
| SMAD2 | ACVR1C    | + |   |
| SMAD2 | ZFYVE9    |   | 0 |
| SMAD2 | ZFYVE9    |   | 0 |
| SMAD2 | RALB      |   | 0 |
| SMAD2 | SMAD6     |   | 0 |
| SMAD2 | ZEB1      | - |   |
| SMAD2 | LEF1      | - |   |
| SMAD2 | E2F5      | - |   |
| SMAD2 | TGFB1     | + |   |
| SMAD2 | TGFB1     | - |   |
| SMAD2 | GSC       | + |   |
| SMAD2 | PML       | + |   |
| SMAD2 | PML       |   | 0 |
| SMAD2 | CDK1      | - |   |
| SMAD2 | SIN3B     | + |   |
| SMAD2 | EEF1A1    |   | 0 |
| SMAD2 | CEBPB     | + |   |
| SMAD2 | NFYC      |   | 0 |
| SMAD2 | SAR1A     |   | 0 |
| SMAD2 | SKI       | - |   |
| SMAD2 | SKI       |   | 0 |
| SMAD2 | PIAS3     | + |   |
| SMAD2 | EP300     |   | 0 |
| SMAD2 | EP300     | - |   |
| SMAD2 | RUNX2     | + |   |
| SMAD2 | FOXO1     | - |   |
| SMAD2 | dab2      | + |   |
| SMAD2 | PPM1A     |   | 0 |
| SMAD2 | LOC728622 | - |   |
| SMAD2 | GRIP1     | - |   |
| SMAD2 | NCOR1     | - |   |
| SMAD2 | UBE2D1    | - |   |
| SMAD2 | SAP30     |   | 0 |
| SMAD2 | EPS8      |   | 0 |
| SMAD2 | NUCKS1    |   | 0 |
| SMAD2 | CALM3     |   | 0 |
| SMAD2 | TGFBR1    | - |   |
| SMAD2 | TGFBR1    | + |   |
| SMAD2 | HSPA8     | - |   |
| SMAD2 | EID2      | + |   |
| SMAD2 | FOXH1     | - |   |
| SMAD2 | MAP3K1    | + |   |
| SMAD2 | RBBP7     | + |   |
| SMAD2 | CDC27     | + |   |
| SMAD2 | HDAC2     | - |   |

|       |         |   |   |
|-------|---------|---|---|
| SMAD2 | ZEB2    | + |   |
| SMAD2 | CITED1  |   | 0 |
| SMAD2 | NKX2-5  | - |   |
| SMAD2 | SMURF1  | + |   |
| SMAD2 | MYST2   | + |   |
| SMAD2 | SNW1    | - |   |
| SMAD2 | PTK6    | + |   |
| SMAD2 | RBX1    | + |   |
| SMAD2 | TP53    | + |   |
| SMAD2 | STRAP   | - |   |
| SMAD2 | STRAP   | - |   |
| SMAD2 | CAMK2A  | - |   |
| SMAD2 | CAMK2A  | - |   |
| SMAD2 | RBL1    | + |   |
| SMAD2 | CTDSP1  | + |   |
| SMAD2 | CALM1   | + |   |
| SMAD2 | TGIF1   |   | 0 |
| SMAD2 | TGIF1   | + |   |
| SMAD2 | STK11   | - |   |
| SMAD2 | UBE2D3  | - |   |
| SMAD2 | TP73    |   | 0 |
| SMAD2 | DCP1A   | + |   |
| SMAD2 | SMAD3   |   | 0 |
| SMAD2 | SMAD3   | - |   |
| SMAD2 | FOXO3   |   | 0 |
| SMAD2 | NCOA2   | + |   |
| SMAD2 | HGS     | + |   |
| SMAD2 | DLG1    | - |   |
| SMAD2 | PAX2    | + |   |
| SMAD2 | MEF2A   | + |   |
| SMAD2 | TGFB3   | - |   |
| SMAD2 | TGFB3   | + |   |
| SMAD2 | SMURF2  | - |   |
| SMAD2 | UBE2D2  | - |   |
| SMAD3 | CREBBP  | + |   |
| SMAD3 | CREBBP  | - |   |
| SMAD3 | SMAD2   | + |   |
| SMAD3 | SMAD2   | + |   |
| SMAD3 | KAT2B   |   | 0 |
| SMAD3 | KAT2B   |   | 0 |
| SMAD3 | CDK4    | + |   |
| SMAD3 | DYRK1B  |   | 0 |
| SMAD3 | DVL1    | + |   |
| SMAD3 | HDAC10  | + |   |
| SMAD3 | ESR1    | - |   |
| SMAD3 | CTDSP2  |   | 0 |
| SMAD3 | AKT1    |   | 0 |
| SMAD3 | IRF7    |   | 0 |
| SMAD3 | PARD3   |   | 0 |
| SMAD3 | CAMK1D  |   | 0 |
| SMAD3 | MYC     | - |   |
| SMAD3 | CDK18   |   | 0 |
| SMAD3 | ATF3    | - |   |
| SMAD3 | RBL2    |   | 0 |
| SMAD3 | AXIN2   |   | 0 |
| SMAD3 | PAX6    |   | 0 |
| SMAD3 | SPTBN1  |   | 0 |
| SMAD3 | CDKN2B  | + |   |
| SMAD3 | SP1     |   | 0 |
| SMAD3 | NUP153  |   | 0 |
| SMAD3 | BRCA2   |   | 0 |
| SMAD3 | CDC16   | - |   |
| SMAD3 | ARNT    |   | 0 |
| SMAD3 | TGFB2   |   | 0 |
| SMAD3 | TGFB2   |   | 0 |
| SMAD3 | SNIP1   |   | 0 |
| SMAD3 | PITX2   | - |   |
| SMAD3 | HDAC6   |   | 0 |
| SMAD3 | SP3     | + |   |
| SMAD3 | CTCF    | - |   |
| SMAD3 | PRKAR2A | + |   |
| SMAD3 | ENG     | + |   |
| SMAD3 | NEK8    | - |   |
| SMAD3 | NUP214  | - |   |

|       |         |   |   |
|-------|---------|---|---|
| SMAD3 | SAP18   | - |   |
| SMAD3 | FOXO4   |   | 0 |
| SMAD3 | CSF2    |   | 0 |
| SMAD3 | ACVR1   | + |   |
| SMAD3 | SIN3A   |   | 0 |
| SMAD3 | RNF111  | + |   |
| SMAD3 | SKIL    |   | 0 |
| SMAD3 | ZNF217  | - |   |
| SMAD3 | TGFBR2  |   | 0 |
| SMAD3 | TGFBR2  | + |   |
| SMAD3 | FKBP1A  | + |   |
| SMAD3 | MMS19   |   | 0 |
| SMAD3 | TFDP1   | - |   |
| SMAD3 | ZBTB17  | + |   |
| SMAD3 | HDAC8   | + |   |
| SMAD3 | RBBP4   | - |   |
| SMAD3 | ERBB2IP | - |   |
| SMAD3 | ERBB2IP |   | 0 |
| SMAD3 | NR5A1   | + |   |
| SMAD3 | RAP2A   |   | 0 |
| SMAD3 | BTK     |   | 0 |
| SMAD3 | HDAC1   |   | 0 |
| SMAD3 | RUNX1   |   | 0 |
| SMAD3 | HNF4A   | + |   |
| SMAD3 | FOXG1   | - |   |
| SMAD3 | ACHE    | + |   |
| SMAD3 | HDAC5   |   | 0 |
| SMAD3 | PPP2CA  | - |   |
| SMAD3 | CDKN1A  |   | 0 |
| SMAD3 | CTNNB1  | - |   |
| SMAD3 | E2F4    |   | 0 |
| SMAD3 | E2F4    | + |   |
| SMAD3 | SMAD7   |   | 0 |
| SMAD3 | SMAD7   | + |   |
| SMAD3 | NR0B2   |   | 0 |
| SMAD3 | CTDSPL  | - |   |
| SMAD3 | SMAD4   | - |   |
| SMAD3 | SMAD4   |   | 0 |
| SMAD3 | E2F1    |   | 0 |
| SMAD3 | MAX     |   | 0 |
| SMAD3 | CUL1    |   | 0 |
| SMAD3 | CUL1    |   | 0 |
| SMAD3 | ACVR1C  | - |   |
| SMAD3 | ACVR1C  | + |   |
| SMAD3 | HR      |   | 0 |
| SMAD3 | HIF1A   | - |   |
| SMAD3 | ZFYVE9  |   | 0 |
| SMAD3 | ZFYVE9  | - |   |
| SMAD3 | SMAD6   | + |   |
| SMAD3 | TERT    | + |   |
| SMAD3 | ZEB1    | + |   |
| SMAD3 | LEF1    |   | 0 |
| SMAD3 | E2F5    | + |   |
| SMAD3 | E2F5    | + |   |
| SMAD3 | HDAC11  | + |   |
| SMAD3 | MAPK1   |   | 0 |
| SMAD3 | TGFB1   | + |   |
| SMAD3 | TGFB1   |   | 0 |
| SMAD3 | RUNX3   | - |   |
| SMAD3 | GSC     | - |   |
| SMAD3 | CDK5    | + |   |
| SMAD3 | SFTPB   | + |   |
| SMAD3 | ATF2    |   | 0 |
| SMAD3 | PML     |   | 0 |
| SMAD3 | PML     | + |   |
| SMAD3 | BRCA1   |   | 0 |
| SMAD3 | TCF4    |   | 0 |
| SMAD3 | SIN3B   | + |   |
| SMAD3 | TFE3    |   | 0 |
| SMAD3 | GATA3   | + |   |
| SMAD3 | HDAC7   |   | 0 |
| SMAD3 | FGF11   | + |   |
| SMAD3 | EEF1A1  | + |   |
| SMAD3 | CEBPB   | - |   |

|       |           |   |   |
|-------|-----------|---|---|
| SMAD3 | NFYC      |   | 0 |
| SMAD3 | JAK2      |   | 0 |
| SMAD3 | SKI       | - |   |
| SMAD3 | SKI       | + |   |
| SMAD3 | INTS6     | - |   |
| SMAD3 | PIAS3     | - |   |
| SMAD3 | EP300     | - |   |
| SMAD3 | EP300     | + |   |
| SMAD3 | JUND      | - |   |
| SMAD3 | RPS6KA2   | - |   |
| SMAD3 | RUNX2     | - |   |
| SMAD3 | FOXO1     | + |   |
| SMAD3 | dab2      | - |   |
| SMAD3 | MBD2      |   | 0 |
| SMAD3 | JUNB      | + |   |
| SMAD3 | FOSB      | + |   |
| SMAD3 | PPM1A     | + |   |
| SMAD3 | LOC728622 | - |   |
| SMAD3 | GRIP1     | - |   |
| SMAD3 | NCOR1     | - |   |
| SMAD3 | CDKN2A    | - |   |
| SMAD3 | SAP30     |   | 0 |
| SMAD3 | HDAC4     | - |   |
| SMAD3 | EPS8      | - |   |
| SMAD3 | KAT2A     |   | 0 |
| SMAD3 | MUC5AC    |   | 0 |
| SMAD3 | TGFBR1    | + |   |
| SMAD3 | TGFBR1    |   | 0 |
| SMAD3 | HSPA8     |   | 0 |
| SMAD3 | POLR2C    | + |   |
| SMAD3 | SOX9      | + |   |
| SMAD3 | ITGB5     |   | 0 |
| SMAD3 | POLR2J    | + |   |
| SMAD3 | AR        | - |   |
| SMAD3 | AR        | - |   |
| SMAD3 | MAPK8     |   | 0 |
| SMAD3 | EID2      | - |   |
| SMAD3 | FOXH1     |   | 0 |
| SMAD3 | IL10      | - |   |
| SMAD3 | PIAS4     | - |   |
| SMAD3 | PIAS4     | - |   |
| SMAD3 | ETS1      | + |   |
| SMAD3 | RBBP7     | + |   |
| SMAD3 | SNAI1     |   | 0 |
| SMAD3 | BTRC      | - |   |
| SMAD3 | PAK1      | - |   |
| SMAD3 | HDAC3     | + |   |
| SMAD3 | CDC27     | + |   |
| SMAD3 | NCOA1     |   | 0 |
| SMAD3 | CD44      | - |   |
| SMAD3 | CD44      | - |   |
| SMAD3 | NR3C1     | + |   |
| SMAD3 | NR3C1     |   | 0 |
| SMAD3 | HDAC2     | - |   |
| SMAD3 | CDKN1B    | + |   |
| SMAD3 | VDR       |   | 0 |
| SMAD3 | ZEB2      | + |   |
| SMAD3 | CITED1    |   | 0 |
| SMAD3 | MAPK14    | + |   |
| SMAD3 | SMO       |   | 0 |
| SMAD3 | SMURF1    | - |   |
| SMAD3 | KDM5C     | + |   |
| SMAD3 | COL1A2    |   | 0 |
| SMAD3 | CBX5      | + |   |
| SMAD3 | CDH1      | - |   |
| SMAD3 | MYST2     |   | 0 |
| SMAD3 | SNW1      | - |   |
| SMAD3 | RBX1      | - |   |
| SMAD3 | JAG1      | - |   |
| SMAD3 | STRAP     |   | 0 |
| SMAD3 | STRAP     |   | 0 |
| SMAD3 | CAMK2A    | - |   |
| SMAD3 | RBL1      | + |   |
| SMAD3 | CTDSP1    |   | 0 |

|       |           |   |   |
|-------|-----------|---|---|
| SMAD3 | BMPR1B    | + |   |
| SMAD3 | CBFB      | + |   |
| SMAD3 | IFNB1     | - |   |
| SMAD3 | PRKY      | - |   |
| SMAD3 | POFUT1    | + |   |
| SMAD3 | FOS       |   | 0 |
| SMAD3 | FZD2      |   | 0 |
| SMAD3 | FCGR3A    | - |   |
| SMAD3 | HDAC9     | - |   |
| SMAD3 | HDAC9     | + |   |
| SMAD3 | JUN       |   | 0 |
| SMAD3 | JUN       | - |   |
| SMAD3 | CDC25A    | + |   |
| SMAD3 | COL17A1   | + |   |
| SMAD3 | APC       |   | 0 |
| SMAD3 | CYP7A1    | - |   |
| SMAD3 | INTS3     | - |   |
| SMAD3 | LAMC1     | + |   |
| SMAD3 | TNC       | + |   |
| SMAD3 | SMAD3     |   | 0 |
| SMAD3 | SMAD3     |   | 0 |
| SMAD3 | KPNB1     | - |   |
| SMAD3 | SERPINE1  |   | 0 |
| SMAD3 | INPPL1    |   | 0 |
| SMAD3 | IGHA1     | + |   |
| SMAD3 | CDK2      |   | 0 |
| SMAD3 | FOXO3     |   | 0 |
| SMAD3 | MAP3K7    | + |   |
| SMAD3 | NCOA2     | - |   |
| SMAD3 | NOTCH1    | - |   |
| SMAD3 | HGS       | - |   |
| SMAD3 | RCHY1     | - |   |
| SMAD3 | DLG1      | + |   |
| SMAD3 | MUC2      | - |   |
| SMAD3 | PAX2      | - |   |
| SMAD3 | TGFB3     | - |   |
| SMAD3 | TGFB3     | + |   |
| SMAD3 | NRIP1     |   | 0 |
| SMAD3 | POLR2B    | + |   |
| SMAD3 | MSTN      |   | 0 |
| SMAD3 | BAG4      | + |   |
| SMAD3 | PRKAR1B   | - |   |
| SMAD3 | IL5       | - |   |
| MDM2  | KAT2B     | - |   |
| MDM2  | KAT2B     | + |   |
| MDM2  | PRG1      | - |   |
| MDM2  | PPM1D     | - |   |
| MDM2  | RELA      | + |   |
| MDM2  | NUP210    | - |   |
| MDM2  | AKT1      | - |   |
| MDM2  | PAK6      | + |   |
| MDM2  | PIAS2     | - |   |
| MDM2  | ATM       |   | 0 |
| MDM2  | SRPK2     | - |   |
| MDM2  | ARRB1     | - |   |
| MDM2  | NUP153    | + |   |
| MDM2  | STK17A    | - |   |
| MDM2  | HIPK2     | - |   |
| MDM2  | NUP214    | - |   |
| MDM2  | PSMD10    |   | 0 |
| MDM2  | ACVR1     | + |   |
| MDM2  | PIAS1     | + |   |
| MDM2  | HEXIM1    | - |   |
| MDM2  | DLAT      | + |   |
| MDM2  | TGFBR2    |   | 0 |
| MDM2  | JMY       | - |   |
| MDM2  | TP63      | - |   |
| MDM2  | TP63      | - |   |
| MDM2  | TAF1      | + |   |
| MDM2  | LOC652799 | - |   |
| MDM2  | UBXN6     |   | 0 |
| MDM2  | CCNG1     | + |   |
| MDM2  | BTK       | + |   |
| MDM2  | HDAC1     | - |   |

|      |          |   |   |
|------|----------|---|---|
| MDM2 | PPP2CA   | - |   |
| MDM2 | CSF1R    | + |   |
| MDM2 | CDKN1A   | - |   |
| MDM2 | DNAJB1   | + |   |
| MDM2 | E2F1     | - |   |
| MDM2 | PPP2R4   | - |   |
| MDM2 | HIF1A    | - |   |
| MDM2 | HIF1A    | - |   |
| MDM2 | KIT      | - |   |
| MDM2 | MAPK1    | + |   |
| MDM2 | RASSF1   | - |   |
| MDM2 | FGFR3    | - |   |
| MDM2 | TGFB1    | - |   |
| MDM2 | CDK5     | + |   |
| MDM2 | SSRP1    | - |   |
| MDM2 | PNCK     | + |   |
| MDM2 | PDPK1    | - |   |
| MDM2 | PML      | + |   |
| MDM2 | TSG101   | + |   |
| MDM2 | RB1      | + |   |
| MDM2 | RB1      |   | 0 |
| MDM2 | IGF1R    | + |   |
| MDM2 | FGFR4    | + |   |
| MDM2 | MAPKAPK2 | + |   |
| MDM2 | RPL11    | + |   |
| MDM2 | RANBP2   | - |   |
| MDM2 | MTBP     | + |   |
| MDM2 | TBK1     |   | 0 |
| MDM2 | MDM4     | + |   |
| MDM2 | MDM4     | + |   |
| MDM2 | YY1      | - |   |
| MDM2 | PDGFRA   | + |   |
| MDM2 | CASP3    | - |   |
| MDM2 | DYRK2    | + |   |
| MDM2 | NCL      | + |   |
| MDM2 | DHFR     | + |   |
| MDM2 | EP300    | + |   |
| MDM2 | UBB      | + |   |
| MDM2 | RPS6KA2  | + |   |
| MDM2 | FOXO1    | + |   |
| MDM2 | ATR      | + |   |
| MDM2 | USP7     |   | 0 |
| MDM2 | FLT1     | - |   |
| MDM2 | UBE2I    | + |   |
| MDM2 | NEK3     | + |   |
| MDM2 | CDKN2A   | + |   |
| MDM2 | CDKN2A   | + |   |
| MDM2 | CCNA2    | - |   |
| MDM2 | CCNA2    |   | 0 |
| MDM2 | UBE2D1   | - |   |
| MDM2 | TRIM28   | - |   |
| MDM2 | ABL1     | + |   |
| MDM2 | FGFR2    | + |   |
| MDM2 | SENP8    | + |   |
| MDM2 | PRKCI    | - |   |
| MDM2 | TERC     | + |   |
| MDM2 | RFFL     | + |   |
| MDM2 | ARHGAP24 | + |   |
| MDM2 | MAPKAPK5 | + |   |
| MDM2 | NEDD8    | + |   |
| MDM2 | AR       | + |   |
| MDM2 | AR       | + |   |
| MDM2 | CDKN2D   | - |   |
| MDM2 | CDKN2D   | - |   |
| MDM2 | TREX1    | + |   |
| MDM2 | AKT3     | - |   |
| MDM2 | TNNI3K   | + |   |
| MDM2 | PRKAA2   | + |   |
| MDM2 | RPS6KA4  | + |   |
| MDM2 | BUB1     | + |   |
| MDM2 | KLK3     | + |   |
| MDM2 | NEK9     | - |   |
| MDM2 | HDAC2    | + |   |
| MDM2 | LNCR1    |   | 0 |



|      |           |   |   |
|------|-----------|---|---|
| MDM2 | TEP1      | + |   |
| MDM2 | SRPK1     |   | 0 |
| MDM2 | EGFR      | + |   |
| MDM2 | MET       | + |   |
| MDM2 | DAXX      | + |   |
| MDM2 | RET       | + |   |
| MDM2 | RPS6KB1   | + |   |
| MDM2 | PSMB6     | + |   |
| MDM2 | UBE2A     | + |   |
| MDM2 | PLK1      | + |   |
| MDM2 | NTRK1     | - |   |
| MDM2 | TP53      | + |   |
| MDM2 | TP53      | + |   |
| MDM2 | RBL1      | + |   |
| MDM2 | STK38     | + |   |
| MDM2 | SCYL2     | + |   |
| MDM2 | SYK       | + |   |
| MDM2 | PRKDC     | - |   |
| MDM2 | RANGAP1   | + |   |
| MDM2 | TRRAP     | - |   |
| MDM2 | NPR2      | + |   |
| MDM2 | ERBB3     | - |   |
| MDM2 | CLK2      | + |   |
| MDM2 | TNK2      | + |   |
| MDM2 | CHEK2     | + |   |
| MDM2 | CHEK2     | + |   |
| MDM2 | KDR       | + |   |
| MDM2 | TP73      | - |   |
| MDM2 | WEE1      | + |   |
| MDM2 | MAPK9     | + |   |
| MDM2 | ERBB4     | + |   |
| MDM2 | ERBB4     | + |   |
| MDM2 | TP53BP1   | + |   |
| MDM2 | CSNK1A1   | + |   |
| MDM2 | AKT2      | - |   |
| MDM2 | CDK2      | - |   |
| MDM2 | MAPK10    | + |   |
| MDM2 | SUMO1     | + |   |
| MDM2 | SUMO1     | + |   |
| MDM2 | NUP62     | + |   |
| MDM2 | DBT       | + |   |
| MDM2 | NR4A1     | + |   |
| TP53 | CREBBP    | - |   |
| TP53 | SMAD2     |   | 0 |
| TP53 | EPHA2     | - |   |
| TP53 | KAT2B     | + |   |
| TP53 | KAT2B     | + |   |
| TP53 | UBE3A     | - |   |
| TP53 | IFRD1     | + |   |
| TP53 | FHL2      | + |   |
| TP53 | HIPK4     | - |   |
| TP53 | PRG1      | + |   |
| TP53 | PRG1      | + |   |
| TP53 | PPM1D     | + |   |
| TP53 | BAG1      | - |   |
| TP53 | BIK       | + |   |
| TP53 | PCBP4     | - |   |
| TP53 | BAX       | + |   |
| TP53 | AEN       | + |   |
| TP53 | BMP4      | + |   |
| TP53 | SNORA62   | - |   |
| TP53 | RECQL4    | - |   |
| TP53 | ESR1      | + |   |
| TP53 | CDCA8     | + |   |
| TP53 | POLR1B    | + |   |
| TP53 | DUSP1     | + |   |
| TP53 | SKP2      | - |   |
| TP53 | DKK1      | + |   |
| TP53 | GPX1      | - |   |
| TP53 | IFI16     | + |   |
| TP53 | BCL2L14   | + |   |
| TP53 | CSNK1E    | + |   |
| TP53 | TNFRSF10D | + |   |
| TP53 | ZMAT3     |   | 0 |

|      |          |   |
|------|----------|---|
| TP53 | GADD45G  | + |
| TP53 | MYC      | + |
| TP53 | TOPBP1   | + |
| TP53 | RRM2B    | + |
| TP53 | RRM2B    | + |
| TP53 | TRAF6    | + |
| TP53 | TP53BP2  | + |
| TP53 | CASP8    | + |
| TP53 | ATF3     | + |
| TP53 | CXCL1    | + |
| TP53 | RBL2     | + |
| TP53 | ATM      | + |
| TP53 | ATM      | - |
| TP53 | DDX5     | + |
| TP53 | PDGFRB   | - |
| TP53 | CARM1    | - |
| TP53 | RNF144B  | + |
| TP53 | PRKAB1   | + |
| TP53 | COL18A1  | + |
| TP53 | ORC1L    | + |
| TP53 | CKS2     | - |
| TP53 | ARHGEF2  | + |
| TP53 | SP1      | + |
| TP53 | C13orf15 | + |
| TP53 | BARD1    | + |
| TP53 | BARD1    | + |
| TP53 | TGFA     | + |
| TP53 | AXIN1    | - |
| TP53 | CSNK2B   | - |
| TP53 | HSPA1A   | + |
| TP53 | CCNG2    | + |
| TP53 | HIPK2    | - |
| TP53 | UBE4A    | + |
| TP53 | FLI1     | + |
| TP53 | ARID3A   | + |
| TP53 | PPM1J    | + |
| TP53 | PHB      | + |
| TP53 | MYST1    | + |
| TP53 | SIRT1    | - |
| TP53 | BTG2     | + |
| TP53 | PSMD10   | + |
| TP53 | PIAS1    | + |
| TP53 | DLAT     | + |
| TP53 | TP63     | + |
| TP53 | CTSD     | + |
| TP53 | DDB2     | - |
| TP53 | CSNK1G1  | - |
| TP53 | IRF1     | + |
| TP53 | CSNK1D   | + |
| TP53 | MLH1     | + |
| TP53 | TRIAP1   | + |
| TP53 | PRDX3    | + |
| TP53 | NFKB1    | - |
| TP53 | NFKB1    | + |
| TP53 | RRM2     | - |
| TP53 | SOX4     | + |
| TP53 | BDKRB2   | + |
| TP53 | TAF1     | + |
| TP53 | TAF1     | - |
| TP53 | NGFR     | + |
| TP53 | STEAP3   | + |
| TP53 | HNRNPUL1 | + |
| TP53 | SORT1    | - |
| TP53 | LTB      | + |
| TP53 | CCNG1    | + |
| TP53 | CCNG1    | + |
| TP53 | SCN3B    | + |
| TP53 | NPM1     | + |
| TP53 | CCNE1    | - |
| TP53 | BAK1     | + |
| TP53 | BBC3     | + |
| TP53 | BBC3     | + |
| TP53 | SIK1     | + |
| TP53 | BCKDHB   | + |

|      |          |   |   |
|------|----------|---|---|
| TP53 | ING5     | + |   |
| TP53 | PTTG1    | + |   |
| TP53 | STK40    | + |   |
| TP53 | ZNF274   | + |   |
| TP53 | PRG2     | + |   |
| TP53 | MAPK12   | + |   |
| TP53 | TRAF2    | - |   |
| TP53 | CDKN1A   | + |   |
| TP53 | CDKN1A   | + |   |
| TP53 | EIF4E    | - |   |
| TP53 | RPL23    | - |   |
| TP53 | IRF5     | - |   |
| TP53 | FBXO11   | - |   |
| TP53 | PIN1     | + |   |
| TP53 | GDF15    | + |   |
| TP53 | DNAJB1P  | + |   |
| TP53 | E2F1     | - |   |
| TP53 | E2F1     | + |   |
| TP53 | HNRNPK   | + |   |
| TP53 | MAX      | + |   |
| TP53 | LIF      | + |   |
| TP53 | S100A2   | + |   |
| TP53 | PSEN1    | + |   |
| TP53 | DAPK1    | + |   |
| TP53 | HIF1A    | - |   |
| TP53 | HIF1A    | + |   |
| TP53 | NDRG1    | + |   |
| TP53 | TIMP3    | + |   |
| TP53 | TERT     | + |   |
| TP53 | PTK2B    | - |   |
| TP53 | SPP1     | + |   |
| TP53 | CSNK1G3  | - |   |
| TP53 | PLAGL1   | + |   |
| TP53 | MXD1     | + |   |
| TP53 | RPRM     | + |   |
| TP53 | MAPK1    | - |   |
| TP53 | ADRBK1   | + |   |
| TP53 | TGFB1    | - |   |
| TP53 | RFWD2    | + |   |
| TP53 | CDK5     | + |   |
| TP53 | SH2D1A   | + |   |
| TP53 | STC1     | + |   |
| TP53 | YEATS4   | + |   |
| TP53 | LATS2    | + |   |
| TP53 | PRMT1    | + |   |
| TP53 | GTF2A1   | - |   |
| TP53 | CDK9     | + |   |
| TP53 | NDN      | - |   |
| TP53 | SP100    | - |   |
| TP53 | TGM1     |   | 0 |
| TP53 | BHLHE40  | + |   |
| TP53 | GSTP1    | + |   |
| TP53 | FDXR     | - |   |
| TP53 | GTSE1    | + |   |
| TP53 | MAPK11   | - |   |
| TP53 | MYO6     | - |   |
| TP53 | PML      | + |   |
| TP53 | PML      | + |   |
| TP53 | PCNA     | + |   |
| TP53 | TYRP1    | + |   |
| TP53 | ING1     | + |   |
| TP53 | BRCA1    | + |   |
| TP53 | INGX     | + |   |
| TP53 | RB1      | + |   |
| TP53 | RB1      | + |   |
| TP53 | C12orf5  | + |   |
| TP53 | IGF1R    | + |   |
| TP53 | IGKV1-6  | - |   |
| TP53 | SFN      | - |   |
| TP53 | PARK2    | - |   |
| TP53 | MDM2     | + |   |
| TP53 | MDM2     | + |   |
| TP53 | HSP90AA1 | + |   |
| TP53 | HMMR     | + |   |

|      |          |   |   |
|------|----------|---|---|
| TP53 | TAP1     | + |   |
| TP53 | MDM4     | + |   |
| TP53 | MDM4     | + |   |
| TP53 | AREG     | + |   |
| TP53 | TP53INP1 | + |   |
| TP53 | CFLAR    | + |   |
| TP53 | YY1      | + |   |
| TP53 | UNC5D    | + |   |
| TP53 | REEP5    | + |   |
| TP53 | PAK4     | + |   |
| TP53 | PTEN     | + |   |
| TP53 | CREB1    | - |   |
| TP53 | HIC1     | + |   |
| TP53 | SERPINB5 | + |   |
| TP53 | NFE2L2   | + |   |
| TP53 | DYRK2    | + |   |
| TP53 | CAV1     | + |   |
| TP53 | PYCARD   | - |   |
| TP53 | ING2     | + |   |
| TP53 | LRDD     | - |   |
| TP53 | DUSP4    | + |   |
| TP53 | GADD45B  | + |   |
| TP53 | ATF1     | + |   |
| TP53 | CSNK1G2  | - |   |
| TP53 | MAPK3    | + |   |
| TP53 | SHISA5   | + |   |
| TP53 | GSK3B    | - |   |
| TP53 | CASP1    | + |   |
| TP53 | EP300    | + |   |
| TP53 | EP300    | + |   |
| TP53 | E4F1     | + |   |
| TP53 | ZNF420   |   | 0 |
| TP53 | EIF2AK2  | - |   |
| TP53 | EIF2AK2  | + |   |
| TP53 | H19      | - |   |
| TP53 | EZH2     | + |   |
| TP53 | PRB3     | + |   |
| TP53 | IGFBP2   |   | 0 |
| TP53 | UBB      | + |   |
| TP53 | HECW1    | + |   |
| TP53 | CDKN3    | + |   |
| TP53 | CDC6     | + |   |
| TP53 | VRK1     | + |   |
| TP53 | VRK1     | + |   |
| TP53 | NUMB     | + |   |
| TP53 | ATR      | + |   |
| TP53 | USP7     | + |   |
| TP53 | IER3     | - |   |
| TP53 | PLK4     | - |   |
| TP53 | BCL6     | + |   |
| TP53 | BCL6     | + |   |
| TP53 | SNAI2    | - |   |
| TP53 | CLCA2    | + |   |
| TP53 | HGF      | + |   |
| TP53 | KAT5     | + |   |
| TP53 | BNIP3L   | + |   |
| TP53 | SPAG5    | - |   |
| TP53 | THBS1    | - |   |
| TP53 | MMP2     | + |   |
| TP53 | MSH2     | - |   |
| TP53 | CSNK2A2  | - |   |
| TP53 | EIF5A    | + |   |
| TP53 | VCAN     | + |   |
| TP53 | CDKN2A   | + |   |
| TP53 | CDKN2A   | - |   |
| TP53 | CCNA2    | + |   |
| TP53 | UBE2D1   | + |   |
| TP53 | SMYD2    | + |   |
| TP53 | TRIM28   | - |   |
| TP53 | CCNK     | + |   |
| TP53 | MED1     | + |   |
| TP53 | FADD     | + |   |
| TP53 | APAF1    | + |   |
| TP53 | DDB1     | - |   |

|      |           |   |   |
|------|-----------|---|---|
| TP53 | PTP4A3    | + |   |
| TP53 | RPS27L    |   | 0 |
| TP53 | MEG3      | - |   |
| TP53 | LASP1     | + |   |
| TP53 | DUSP5     | - |   |
| TP53 | EI24      | - |   |
| TP53 | PRL       |   | 0 |
| TP53 | DEK       | - |   |
| TP53 | DEK       | - |   |
| TP53 | SMARCA4   | - |   |
| TP53 | LOC731751 | + |   |
| TP53 | ARHGAP24  | + |   |
| TP53 | GADD45A   | - |   |
| TP53 | FGFR1OP   | + |   |
| TP53 | MAPKAPK5  | + |   |
| TP53 | TNFRSF10A | + |   |
| TP53 | NEDD8     | - |   |
| TP53 | RPA4      |   | 0 |
| TP53 | LOC651610 | + |   |
| TP53 | BACE2     | + |   |
| TP53 | PRMT5     | + |   |
| TP53 | HTT       | + |   |
| TP53 | AURKA     | + |   |
| TP53 | AURKA     | + |   |
| TP53 | AR        | + |   |
| TP53 | MAPK8     | + |   |
| TP53 | TREX1     |   | 0 |
| TP53 | ICAM1     | + |   |
| TP53 | S100A9    | + |   |
| TP53 | CSNK2A1   | + |   |
| TP53 | S100B     | + |   |
| TP53 | RAD23A    | + |   |
| TP53 | GLI1      | + |   |
| TP53 | GLI1      | + |   |
| TP53 | S100A4    | + |   |
| TP53 | VRK2      | - |   |
| TP53 | BAI1      | - |   |
| TP53 | BUB1      | + |   |
| TP53 | CD44      | + |   |
| TP53 | NR3C1     | + |   |
| TP53 | NR3C1     | + |   |
| TP53 | CCNB1     | - |   |
| TP53 | SESN3     | + |   |
| TP53 | TNFRSF10C | + |   |
| TP53 | FAS       | + |   |
| TP53 | FAS       | + |   |
| TP53 | RAC1      |   | 0 |
| TP53 | RAC1      | + |   |
| TP53 | AFP       | + |   |
| TP53 | VDR       | + |   |
| TP53 | DNAJA3    | - |   |
| TP53 | PRC1      | - |   |
| TP53 | ERCC2     | + |   |
| TP53 | NF1       |   | 0 |
| TP53 | MAPK14    | - |   |
| TP53 | DDIT4     | + |   |
| TP53 | BCL2      | - |   |
| TP53 | BCL2      | - |   |
| TP53 | WRN       | + |   |
| TP53 | WRN       | + |   |
| TP53 | EGFR      | + |   |
| TP53 | ALK       | + |   |
| TP53 | TP53AIP1  | - |   |
| TP53 | MET       | + |   |
| TP53 | DAXX      | + |   |
| TP53 | WT1       | + |   |
| TP53 | PLA2G6    | + |   |
| TP53 | FASLG     | + |   |
| TP53 | PTP4A1    | + |   |
| TP53 | TSC2      | + |   |
| TP53 | HSPB1     | + |   |
| TP53 | FLII      | - |   |
| TP53 | MYB       | - |   |
| TP53 | MTA2      | - |   |

|      |           |   |   |
|------|-----------|---|---|
| TP53 | CD82      | + |   |
| TP53 | UBE2A     | + |   |
| TP53 | ANKRD11   |   | 0 |
| TP53 | PLK1      | + |   |
| TP53 | EAF2      |   | 0 |
| TP53 | SESN1     | - |   |
| TP53 | LGALS3    | - |   |
| TP53 | SETD2     | + |   |
| TP53 | RBM38     | + |   |
| TP53 | TP53      | + |   |
| TP53 | TP53      | + |   |
| TP53 | CABLES2   | + |   |
| TP53 | IGFBP3    | + |   |
| TP53 | EDN2      | + |   |
| TP53 | PTGS2     |   | 0 |
| TP53 | KLF4      | - |   |
| TP53 | PRKDC     | + |   |
| TP53 | CX3CL1    | - |   |
| TP53 | TRRAP     | + |   |
| TP53 | MAPK13    | - |   |
| TP53 | CABIN1    | - |   |
| TP53 | FANCC     | - |   |
| TP53 | BCL2L1    | + |   |
| TP53 | BCL2L1    | - |   |
| TP53 | SIAH1     | + |   |
| TP53 | SETD7     | - |   |
| TP53 | UIMC1     | + |   |
| TP53 | FOS       | + |   |
| TP53 | ABCB1     | - |   |
| TP53 | ABCB1     | + |   |
| TP53 | SESN2     | + |   |
| TP53 | STK11     | + |   |
| TP53 | CHEK2     | + |   |
| TP53 | GH1       | - |   |
| TP53 | PMS2      | + |   |
| TP53 | SOD2      | + |   |
| TP53 | CD40      | + |   |
| TP53 | SETD8     | + |   |
| TP53 | PRKCD     | - |   |
| TP53 | FGF2      | + |   |
| TP53 | CD40LG    |   | 0 |
| TP53 | XIAP      | + |   |
| TP53 | XIAP      | - |   |
| TP53 | TP73      | + |   |
| TP53 | PMAIP1    | - |   |
| TP53 | ZNF148    | - |   |
| TP53 | PLK3      | - |   |
| TP53 | PLK3      | + |   |
| TP53 | GNL3      | + |   |
| TP53 | TOPORS    | + |   |
| TP53 | HMGB1     | - |   |
| TP53 | HMGB1     | + |   |
| TP53 | JUN       | + |   |
| TP53 | MAPK9     | - |   |
| TP53 | BDNF      | - |   |
| TP53 | RAD51     | + |   |
| TP53 | PPP1R13L  | + |   |
| TP53 | APC       | - |   |
| TP53 | BID       | + |   |
| TP53 | PERP      | + |   |
| TP53 | MAP4K4    | + |   |
| TP53 | ECT2      | + |   |
| TP53 | TCEAL1    | + |   |
| TP53 | S100A6    | - |   |
| TP53 | TTC5      | + |   |
| TP53 | CHEK1     | + |   |
| TP53 | CASP10    | + |   |
| TP53 | CASP10    | + |   |
| TP53 | ELAVL1    | + |   |
| TP53 | CSNK1A1   | + |   |
| TP53 | TNFRSF10B | + |   |
| TP53 | TP53I3    | + |   |
| TP53 | NCKAP1L   | - |   |
| TP53 | SERPINE1  | + |   |

|       |        |   |   |
|-------|--------|---|---|
| TP53  | MORC3  | - |   |
| TP53  | CDK2   | + |   |
| TP53  | CDK2   | - |   |
| TP53  | AIFM2  | + |   |
| TP53  | NLRC4  | - |   |
| TP53  | NLRC4  | + |   |
| TP53  | MAPK10 | + |   |
| TP53  | FBXO42 | - |   |
| TP53  | SUMO1  | + |   |
| TP53  | SUMO1  | + |   |
| TP53  | C8orf4 | - |   |
| TP53  | NOTCH1 |   | 0 |
| TP53  | RCHY1  | + |   |
| TP53  | RCHY1  | + |   |
| TP53  | MUC2   | + |   |
| TP53  | PRDM1  | - |   |
| TP53  | IRF3   | + |   |
| TP53  | CASP6  | + |   |
| TP53  | DBT    | + |   |
| TP53  | MSX1   | + |   |
| TP53  | NR4A1  | + |   |
| TP53  | HSPA1B | - |   |
| SUMO1 | UBE3A  | + |   |
| SUMO1 | XPO1   | + |   |
| SUMO1 | NUP210 | + |   |
| SUMO1 | GATA4  | - |   |
| SUMO1 | PIAS2  | + |   |
| SUMO1 | NUP153 | + |   |
| SUMO1 | NUP153 | + |   |
| SUMO1 | HIPK2  | + |   |
| SUMO1 | HDAC6  | - |   |
| SUMO1 | RAN    | + |   |
| SUMO1 | CTBP1  | + |   |
| SUMO1 | CTBP1  |   | 0 |
| SUMO1 | NUP214 |   | 0 |
| SUMO1 | NUP214 | + |   |
| SUMO1 | PIAS1  | + |   |
| SUMO1 | HDAC1  | + |   |
| SUMO1 | HDAC1  |   | 0 |
| SUMO1 | MKL1   | + |   |
| SUMO1 | UBE2L6 | + |   |
| SUMO1 | SMAD4  | + |   |
| SUMO1 | UBE2G2 | + |   |
| SUMO1 | LEF1   | + |   |
| SUMO1 | TGFB1  |   | 0 |
| SUMO1 | UBE2F  | + |   |
| SUMO1 | SP100  |   | 0 |
| SUMO1 | PML    | - |   |
| SUMO1 | MDM2   | + |   |
| SUMO1 | MDM2   | + |   |
| SUMO1 | UBE2G1 |   | 0 |
| SUMO1 | RANBP2 | + |   |
| SUMO1 | ATF7   | + |   |
| SUMO1 | SHC1   | + |   |
| SUMO1 | UBA1   |   | 0 |
| SUMO1 | UBE2L3 | + |   |
| SUMO1 | PRAM1  |   | 0 |
| SUMO1 | UBB    | + |   |
| SUMO1 | UBB    | - |   |
| SUMO1 | CR2    |   | 0 |
| SUMO1 | TCF7L2 |   | 0 |
| SUMO1 | UBE2I  | + |   |
| SUMO1 | CDKN2A | + |   |
| SUMO1 | HDAC4  |   | 0 |
| SUMO1 | HDAC4  |   | 0 |
| SUMO1 | PGR    | + |   |
| SUMO1 | MAPK8  |   | 0 |
| SUMO1 | NR3C1  |   | 0 |
| SUMO1 | DLD    |   | 0 |
| SUMO1 | NFKBIA |   | 0 |
| SUMO1 | HSF1   | + |   |
| SUMO1 | CDH1   | + |   |
| SUMO1 | UBE2A  |   | 0 |
| SUMO1 | TP53   | + |   |

|       |          |   |   |
|-------|----------|---|---|
| SUMO1 | TP53     |   | 0 |
| SUMO1 | RANGAP1  |   | 0 |
| SUMO1 | HDAC9    |   | 0 |
| SUMO1 | HDAC9    |   | 0 |
| SUMO1 | TOPORS   | + |   |
| SUMO1 | SUMO1    |   | 0 |
| SUMO1 | SUMO1    | + |   |
| SUMO1 | UBE2E2   |   | 0 |
| SUMO1 | NUP62    | - |   |
| PTEN  | MAGI3    | - |   |
| PTEN  | AKT1     | - |   |
| PTEN  | INPP5J   | - |   |
| PTEN  | PRKCA    | - |   |
| PTEN  | PDGFRB   |   | 0 |
| PTEN  | CD79A    | + |   |
| PTEN  | CD28     | + |   |
| PTEN  | PIK3CG   | + |   |
| PTEN  | BMP2     | + |   |
| PTEN  | TNF      | - |   |
| PTEN  | ROCK2    | - |   |
| PTEN  | NEDD4    | - |   |
| PTEN  | PTK2     | - |   |
| PTEN  | BCR      |   | 0 |
| PTEN  | SLC9A3R1 | - |   |
| PTEN  | TFAP2A   | - |   |
| PTEN  | IGF2     | - |   |
| PTEN  | IGF2     | - |   |
| PTEN  | PIK3CA   | - |   |
| PTEN  | PIK3CA   | - |   |
| PTEN  | PPP2R4   | + |   |
| PTEN  | NDRG1    | + |   |
| PTEN  | C11orf2  | + |   |
| PTEN  | TERT     | - |   |
| PTEN  | RETN     | - |   |
| PTEN  | TGFB1    | + |   |
| PTEN  | INPP5A   | - |   |
| PTEN  | IGF1R    | - |   |
| PTEN  | ERVK2    | - |   |
| PTEN  | HSP90AA1 |   | 0 |
| PTEN  | ITGB1    | - |   |
| PTEN  | SHC1     | - |   |
| PTEN  | CASP3    | + |   |
| PTEN  | CAV1     | + |   |
| PTEN  | ADM      | - |   |
| PTEN  | IGFBP2   | + |   |
| PTEN  | PIK3R1   | - |   |
| PTEN  | SLC9A3R2 | + |   |
| PTEN  | HGF      | + |   |
| PTEN  | BMI1     | + |   |
| PTEN  | SOS1     | + |   |
| PTEN  | FGFR2    | + |   |
| PTEN  | CD79B    | - |   |
| PTEN  | TNKS     | + |   |
| PTEN  | AR       | + |   |
| PTEN  | AR       |   | 0 |
| PTEN  | AKT3     | - |   |
| PTEN  | RSL1D1   | + |   |
| PTEN  | GLTSCR2  | + |   |
| PTEN  | TEP1     | + |   |
| PTEN  | ROCK1    | + |   |
| PTEN  | EGFR     | - |   |
| PTEN  | TP53     | + |   |
| PTEN  | FOS      | + |   |
| PTEN  | HPCX     | - |   |
| PTEN  | MAGI2    | + |   |
| PTEN  | XIAP     | + |   |
| PTEN  | JUN      | + |   |
| PTEN  | AKT2     | + |   |
| PTEN  | NOTCH1   | + |   |
| PTEN  | GRB2     |   | 0 |
| PTEN  | SMAD2    |   | 0 |
| PTEN  | SMAD3    |   | 0 |
| PTEN  | WWP2     |   | 0 |
| PTEN  | AR       |   | 0 |



|      |             |   |
|------|-------------|---|
| PTEN | Thioredoxin | 0 |
| PTEN | PCAF        | 0 |
| PTEN | ARRB1       | 0 |
| PTEN | ARRB2       | 0 |
| PTEN | BMI-1       | 0 |
| PTEN | Prdx-1      | 0 |
| PTEN | RAK         | 0 |
| PTEN | p53         | 0 |
| PTEN | CAV         | 0 |
| PTEN | STK11       | 0 |
| PTEN | MVP         | 0 |
| PTEN | PICT-1      | 0 |
| PTEN | NEP         | 0 |
| PTEN | Myo5a       | 0 |
| PTEN | Myo5b       | 0 |
| PTEN | Myo5c       | 0 |
| PTEN | MSP58       | 0 |
| PTEN | PREX 2      | 0 |
| PTEN | APC 3       | 0 |
| PTEN | APC 4       | 0 |
| PTEN | APC 5       | 0 |
| PTEN | APC 7       | 0 |
| PTEN | Cenpc 1     | 0 |
| PTEN | PDGFRB      | 0 |
| PTEN | DLG1        | 0 |
| PTEN | MAGI1       | 0 |
| PTEN | MAGI2       | 0 |
| PTEN | MAGI3       | 0 |
| PTEN | Mast1       | 0 |
| PTEN | Mast2       | 0 |
| PTEN | Mast3       | 0 |
| PTEN | NHERF 1     | 0 |
| PTEN | NHERF2      | 0 |
| PTEN | Par3        | 0 |
| PTEN | 5-HTR2C     | 0 |
| PTEN | Sharpin     | 0 |

## Topological Analysis of Network

| Gene name | Protein name | Centrality Score |
|-----------|--------------|------------------|
| TP53      | TP53         | 0.503            |
| SMAD3     | SMAD3        | 0.267            |
| MDM2      | MDM2         | 0.175            |
| SMAD2     | SMAD2        | 0.148            |
| PTEN      | PTEN         | 0.119            |
| BRCA1     | BRCA1        | 0.073            |
| SUMO1     | SUMO1        | 0.067            |
| DAXX      | DAXX         | 0.056            |
| TGFB1     | TGFB1        | 0.009            |
| AR        | AR           | 0.008            |

**SUPPLEMENTARY TABLE S8**  
**DISORDER SCORES FOR KINASES THAT PHOSPHORYLATE PTEN**

| Uniprot ID | Name of Kinase                     | Total no. of amino acids | No. of disordered amino acids | No. of disordered stretches >30 | Disordered or Ordered | Position of disordered amino acids                                                                                                                                                                                                                                                                                                                                       | Kinase domain                                    |
|------------|------------------------------------|--------------------------|-------------------------------|---------------------------------|-----------------------|--------------------------------------------------------------------------------------------------------------------------------------------------------------------------------------------------------------------------------------------------------------------------------------------------------------------------------------------------------------------------|--------------------------------------------------|
| P12931     | Src                                | 536                      | 86                            | 1                               | D                     | 1-64; 68-75; 77-78; 522; 526-536                                                                                                                                                                                                                                                                                                                                         | 270-523                                          |
| P68400     | Casein Kinase II subunit $\alpha$  | 391                      | 80                            | 1                               | D                     | 1-18; 77-78; 332-391                                                                                                                                                                                                                                                                                                                                                     | 39-324                                           |
| P19784     | Casein Kinase II subunit $\alpha'$ | 350                      | 25                            | 0                               | O                     | 1-14; 77-81; 345-350                                                                                                                                                                                                                                                                                                                                                     | 40-325                                           |
| P67870     | Casein Kinase II subunit $\beta$   | 215                      | 41                            | 0                               | O                     | 1-14; 59-75; 206-215                                                                                                                                                                                                                                                                                                                                                     | Not applicable (Interacts with $\alpha$ subunit) |
| P42685     | RAK                                | 505                      | 30                            | 0                               | O                     | 1-13; 89-92; 493-505                                                                                                                                                                                                                                                                                                                                                     | 234-491                                          |
| P49841     | GSK 3 $\beta$                      | 420                      | 101                           | 2                               | D                     | 1-54; 56; 376-420                                                                                                                                                                                                                                                                                                                                                        | 56-340                                           |
| Q9H4B4     | PLK3                               | 646                      | 156                           | 2                               | D                     | 1-64; 354-428; 632-646                                                                                                                                                                                                                                                                                                                                                   | 62-314                                           |
| Q9R1L5     | MAST1                              | 1570                     | 960                           | 7                               | D                     | 23-28; 33-80; 89-125; 134; 138-170; 173-174; 339-370; 373-374; 681-683; 686-704; 717-967; 1016-1020; 1022; 1027-1029; 1033; 1036-1037; 1054-1104; 1107-1570                                                                                                                                                                                                              | 375-648                                          |
| Q60592     | MAST2                              | 1734                     | 1049                          | 10                              | D                     | 24; 30-31; 38-40; 64-66; 70-78; 85-96; 103-104; 112-114; 118-160; 167; 169-201; 203-205; 209-210; 212-245; 264-267; 272; 274-279; 335-336; 418-447; 451-452; 690-691; 696-697; 699; 703; 752-754; 756-778; 800-834; 847-962; 964-985; 1004-1032; 1080-1083; 1086-1101; 1109-1110; 1122; 1126-1177; 1180-1559; 1565-1567; 1570; 1575-1586; 1590-1600; 1603-1734           | 453-726                                          |
| O60307     | MAST3                              | 1309                     | 676                           | 7                               | D                     | 1-63; 70-72; 86-120; 129-130; 136-163; 182; 250-252; 333; 335-358; 627; 670-696; 719-740; 757-786; 788-896; 898-904; 908; 911-950; 990; 996-1000; 1035-1039; 1041-1084; 1086-1309                                                                                                                                                                                        | 367-640                                          |
| O15021     | MAST4                              | 2626                     | 1922                          | 15                              | D                     | 1-81; 86-174; 178; 181-184; 186-223; 225-277; 286-319; 321-323; 343-361; 385; 394; 538-561; 799; 803; 805-811; 816-817; 872-899; 919-1086; 1106; 1108-1144; 1193; 1228-1277; 1281-1288; 1291-1502; 1503-1505; 1507-1535; 1537-1568; 1581-1677; 1692-1694; 1702-1714; 1716-1747; 1749; 1756; 1758; 1761-1793; 1795-1798; 1810-1867; 1871; 1873-1874; 1876-1882; 1884-2626 | 573-846                                          |
| Q15831     | STK11                              | 433                      | 82                            | 1                               | D                     | 212; 215-218; 312-329; 331-334; 365-418; 421                                                                                                                                                                                                                                                                                                                             | 49-309                                           |
| P48729     | Casein Kinase I subunit $\alpha$   | 337                      | 33                            | 0                               | O                     | 172-173; 175; 235; 309-337                                                                                                                                                                                                                                                                                                                                               | 17-285                                           |
